# Supplementary material
Source: PubMed Central journal article supplement (PMC3528805)
Supplement: NIHMS426051-supplement-1_si_001.pdf [file NIHMS426051-supplement-1_si_001.pdf]

# Supporting Information

For

## Enantioselective Iodolactonization of Disubstituted Olefinic Acids Using a Bifunctional Catalyst

Chao Fang, Daniel H. Paull, J. Caleb Hethcox, Christopher R. Shugrue, and Stephen F.  
Martin\*

Department of Chemistry and Biochemistry, The University of Texas at Austin, Austin, Texas  
78712

*[sfmartin@mail.utexas.edu](mailto:sfmartin@mail.utexas.edu)*

## Table of Contents

|                                                                                           |     |
|-------------------------------------------------------------------------------------------|-----|
| General methods.....                                                                      | S3  |
| Synthesis of olefinic acids.....                                                          | S4  |
| Enantioselective iodolactonization procedure, characterization data, and HPLC traces..... | S5  |
| NMR spectra .....                                                                         | S24 |
| References.....                                                                           | S67 |

## General

Solvents were purified before use as follows unless otherwise noted. Dichloromethane and benzene were distilled from calcium hydride immediately prior to use. Tetrahydrofuran and diethyl ether were dried by filtration through two columns of activated, neutral alumina according to the procedure described by Grubbs.<sup>1</sup> Methanol (MeOH), acetonitrile (MeCN), and dimethylformamide (DMF) were dried by filtration through two columns of activated molecular sieves, and toluene was dried by filtration through one column of activated, neutral alumina followed by one column of Q5 reactant. These solvents were determined to have less than 50 ppm H<sub>2</sub>O by Karl Fischer coulometric moisture analysis. Reagents were reagent grade and used without purification unless otherwise noted. *N*-iodosuccinimide (NIS) was freshly prepared from NCS and NaI,<sup>2</sup> and triturated from dioxane/CCl<sub>4</sub> (1:2). All reactions were performed in flame-dried glassware under nitrogen or argon; reaction temperatures refer to the temperature of the cooling/heating bath.

Analytical HPLC separations were performed using a Pirkle Covalent (S,S) Whelk-O1 (Regis Technologies, Inc.), or a Chiralcel OD-H (Daicel Chemical Industries, Ltd.) column, as indicated. Infrared (IR) spectra were obtained neat on sodium chloride and reported as wavenumbers (cm<sup>-1</sup>). Proton nuclear magnetic resonance (<sup>1</sup>H NMR) and carbon nuclear magnetic resonance (<sup>13</sup>C NMR) spectra were obtained at the indicated field as solutions in CDCl<sub>3</sub> unless otherwise indicated. Chemical shifts are referenced to the deuterated solvent (*e.g.*, for CDCl<sub>3</sub>,  $\delta = 7.26$  ppm and 77.0 ppm for <sup>1</sup>H and <sup>13</sup>C NMR, respectively) and are reported in parts per million (ppm,  $\delta$ ) relative to tetramethylsilane (TMS,  $\delta = 0.00$  ppm). Coupling constants (*J*) are reported in Hz and the splitting abbreviations used are: s, singlet; d, doublet; t, triplet; q, quartet; m, multiplet; comp, overlapping multiplets of magnetically nonequivalent protons; br, broad; app, apparent.

## Synthesis of Olefinic Acids

Catalyst **4** was prepared according to our previously reported method.<sup>3</sup> All olefinic acids were made by literature procedures as follows: 5-Substituted-4(*Z*)-pentenoic acids **5a-h** and 6-Substituted-5(*Z*)-hexanoic acids **7a-d** were made by the method of Yeung, et al.;<sup>4</sup> (*E*)-6-methylhept-4-enoic acid (**9a**) was made by the method of Kaga, et al.;<sup>5</sup> 5-Aryl-4(*E*)-pentenoic acid (**9b-d**) were made of the method of Yeung, et al.<sup>4</sup> Characterization data is reported below for new compounds.

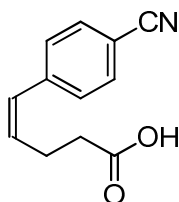

**(Z)-5-(4-Cyanophenyl)pent-4-enoic acid (5f)**: white solid; > 20:1 *Z/E* ratio; mp 62–64 °C; <sup>1</sup>H NMR (CDCl<sub>3</sub>, 400 MHz) δ 11.0 (br s, 1 H), 7.63 (d, *J* = 8.4 Hz, 2 H), 7.36 (d, *J* = 8.0 Hz, 1 H), 6.49 (d, *J* = 12.0 Hz, 1 H), 5.78 (dt, *J* = 11.6, 7.2 Hz, 1 H), 2.67–2.62 (m, 2 H), 2.52 (t, *J* = 7.2 Hz, 2 H); <sup>13</sup>C NMR (CDCl<sub>3</sub>, 75 MHz) δ 179.0, 141.2, 133.0, 132.0, 129.2, 128.9, 118.8, 110.2, 33.7, 23.6; IR (neat) 3020, 2919, 2228, 1711, 1605, 1416, 1287, 1213, 855 cm<sup>-1</sup>; HRMS (ESI) *m/z* calcd for [C<sub>12</sub>H<sub>11</sub>NNaO<sub>2</sub>]<sup>+</sup> (M+Na), 224.0682; found 224.0681.

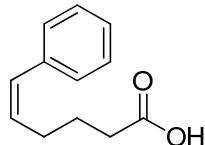

**(Z)-6-Phenylhex-5-enoic acid (7a)**: clear, colorless oil; 14:1 *Z/E* ratio; <sup>1</sup>H NMR (CDCl<sub>3</sub>, 300 MHz) δ 10.2 (br s, 1 H), 7.36–7.19 (comp, 5 H), 6.47 (d, *J* = 11.7 Hz, 1 H), 5.63 (dt, *J* = 11.7, 7.2 Hz, 1 H), 2.44–3.25 (comp, 4 H), 1.85–1.74 (m, 2H); <sup>13</sup>C NMR (CDCl<sub>3</sub>, 75 MHz) δ 179.8, 137.7, 131.3, 129.9, 128.7, 128.1, 126.6, 33.4, 27.8, 24.8; IR (neat) 3012, 2938, 1709, 1412, 1240, 768, 700 cm<sup>-1</sup>; HRMS (CI) *m/z* calcd for [C<sub>12</sub>H<sub>13</sub>O<sub>2</sub>]<sup>-</sup> (M-H), 189.0921; found 189.0918.

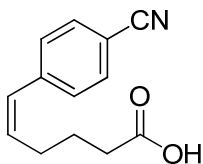

**(Z)-6-(4-Cyanophenyl)hex-5-enoic acid (7b)**: white solid; 20:1 *Z/E* ratio; mp 86–88 °C; <sup>1</sup>H NMR (CDCl<sub>3</sub>, 300 MHz) δ 10.8 (br s, 1 H), 7.61 (d, *J* = 6.6 Hz, 2 H), 7.35 (d, *J* = 8.1 Hz, 2 H), 6.47 (d, *J* = 11.7 Hz, 1 H), 5.80 (dt, *J* = 11.7, 7.5 Hz, 1 H), 2.42–2.33 (comp, 4 H), 1.86–1.76 (m, 2 H); <sup>13</sup>C NMR (CDCl<sub>3</sub>, 75 MHz) δ 179.6, 142.0, 134.5, 132.0, 129.3, 128.5, 119.0, 110.1, 33.2, 27.8, 24.4; IR (neat) 3019, 2935, 2908, 2223, 1699, 1604,



1411, 1319, 1242, 1205, 946, 849  $\text{cm}^{-1}$ ; HRMS (CI)  $m/z$  calcd for  $[\text{C}_{13}\text{H}_{12}\text{NO}_2]^-$  (M-H), 214.0874; found 214.0871.

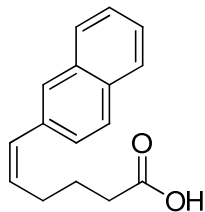

**(Z)-6-(Naphthalen-2-yl)hex-5-enoic acid (7c)** white solid; 72–73 °C; > 20:1 *Z/E* ratio;  $^1\text{H}$  NMR ( $\text{CDCl}_3$ , 300 MHz)  $\delta$  11.1 (br s, 1 H), 7.80–7.76 (comp, 3 H), 7.69 (s, 1 H), 7.47–7.37 (comp, 3 H), 6.59 (d,  $J = 11.7$  Hz, 1 H), 5.69 (dt,  $J = 11.7, 7.2$  Hz, 1 H), 2.49–2.34 (m, 2 H), 2.36 (t,  $J = 7.5$  Hz, 2 H), 1.85–1.78 (m, 2 H);  $^{13}\text{C}$  NMR ( $\text{CDCl}_3$ , 75 MHz)  $\delta$  180.0, 134.9, 133.3, 132.2, 131.8, 130.0, 127.9, 127.6, 127.5, 127.4, 127.1, 126.0, 125.7, 33.5, 27.9, 24.7; IR (neat) 3050, 2945, 1704, 1330, 1242, 950, 897, 860, 821, 716  $\text{cm}^{-1}$ ; HRMS (CI)  $m/z$  calcd for  $[\text{C}_{16}\text{H}_{15}\text{O}_2]^-$  (M-H), 239.1078; found 239.1076.

## General Procedure for Enantioselective Iodolactonizations

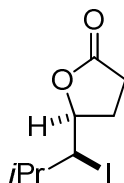

**(S)-5-[(S)-1-Iodo-2-methylpropyl]dihydrofuran-2(3H)-one (6a)**. NIS (0.135 g, 0.600 mmol) was added to a solution of **5a** (0.071 g, 0.500 mmol) and catalyst **4** (0.026 g, 0.050 mmol) in toluene (10 mL) and  $\text{CH}_2\text{Cl}_2$  (5 mL) at  $-20$  °C. The solution was stirred for 14 h, whereupon saturated aqueous  $\text{Na}_2\text{S}_2\text{O}_3$  (5 mL) was added, and the mixture was warmed to room temperature with vigorous stirring. The layers were separated, and the aqueous layer was extracted with  $\text{CH}_2\text{Cl}_2$  ( $2 \times 10$  mL). The combined organic layers were dried ( $\text{Na}_2\text{SO}_4$ ), filtered and concentrated under reduced pressure. The crude residue was purified by column chromatography, eluting with hexanes/EtOAc (5:1, v/v) to give 0.127 g (95%) of **6a** as a clear, colorless oil:  $^1\text{H}$  NMR ( $\text{CDCl}_3$ , 300 MHz)  $\delta$  4.36–4.25 (m, 1 H), 4.08 (dd,  $J = 5.1, 4.6$  Hz, 1 H), 2.80–2.66 (m, 1 H), 2.64–2.49 (m, 1 H), 2.48–2.34 (m, 1 H), 2.14–2.00 (m, 1 H), 1.70–1.58 (m, 1 H), 1.07 (app dd,  $J = 6.5, 1.0$  Hz, 6 H);  $^{13}\text{C}$  NMR ( $\text{CDCl}_3$ , 75 MHz)  $\delta$  176.0, 81.0, 51.5, 33.6, 28.6, 28.5, 22.9, 22.1; IR (neat) 1775  $\text{cm}^{-1}$ ; HRMS (ESI)  $m/z$  calcd for  $[\text{C}_8\text{H}_{13}\text{INaO}_2]^+$  (M+Na), 290.9852; found 290.9851;  $[\alpha]_D^{25} +84.6$  ( $c = 1.0$ ,  $\text{CHCl}_3$ ); HPLC (259 nm): Whelk-O1 (20% *i*-PrOH / hexanes, 1.2 mL/min) 20.1 min (minor), 23.5 min (major); 97.5:2.5 er.

Racemic:

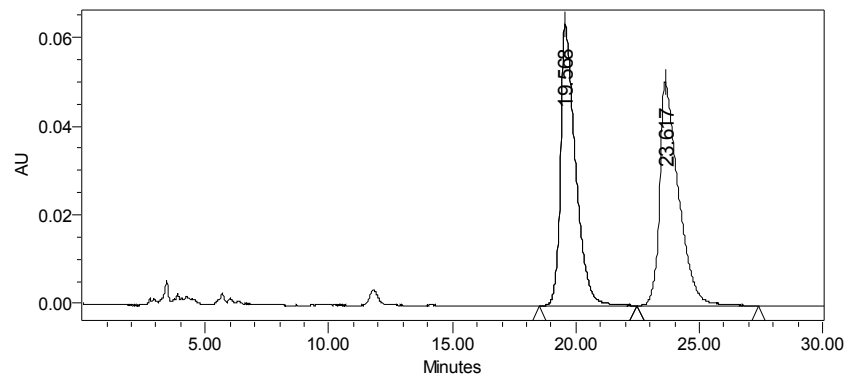

Enantiomeric:

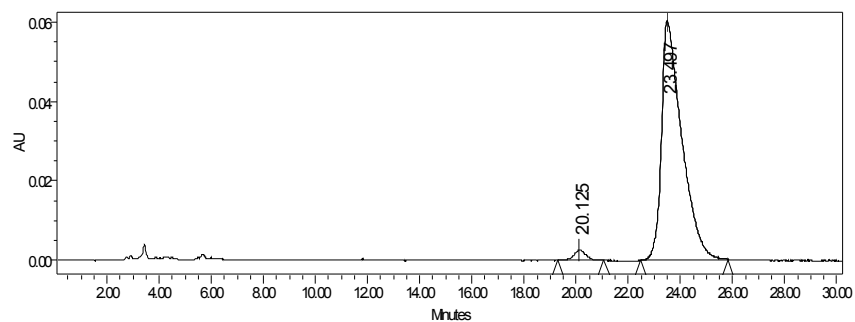

|   | Name | Retention Time | Area    | % Area | Height | Int Type |
|---|------|----------------|---------|--------|--------|----------|
| 1 |      | 20.125         | 83389   | 2.48   | 2580   | bb       |
| 2 |      | 23.497         | 3273933 | 97.52  | 60407  | bb       |

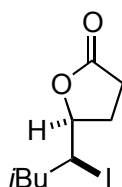

**(S)-5-[(S)-1-Iodo-3-methylbutyl]dihydrofuran-2(3H)-one (6b).** Isolated 0.027 g (94%) of **6b** as a clear, colorless oil:  $^1\text{H}$  NMR ( $\text{CDCl}_3$ , 400 MHz)  $\delta$  4.38–4.32 (m, 1 H), 4.25–4.18 (m, 1 H), 2.78–2.64 (m, 1 H), 2.62–2.51 (m, 1 H), 2.49–2.37 (m, 1 H), 2.18–2.07 (m, 1 H), 2.00–1.82 (comp, 2 H), 1.46–1.38 (m, 1 H), 0.98 (d,  $J = 6.8$  Hz, 3 H), 0.88 (d,  $J = 6.8$  Hz, 3 H);  $^{13}\text{C}$  NMR ( $\text{CDCl}_3$ , 100 MHz)  $\delta$  176.4, 82.0, 43.9, 37.6, 28.6, 27.9, 26.8, 22.9, 20.6; IR (neat)  $1780\text{ cm}^{-1}$ ; HRMS (CI)  $m/z$  calcd for  $[\text{C}_9\text{H}_{16}\text{IO}_2]^+$  (M+H), 283.0195; found 283.0192;  $[\alpha]_D^{26} -16.5$  ( $c = 0.6$ ,  $\text{CHCl}_3$ ); HPLC (258 nm): Whelk-O1 (20% *i*-PrOH / hexanes, 1.2 mL/min) 13.0 min (minor), 18.8 min (major); 98:2 er

Racemic:

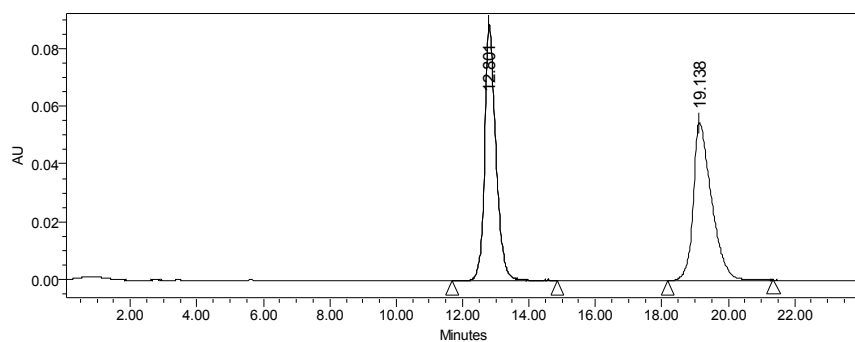

Enantiomeric:

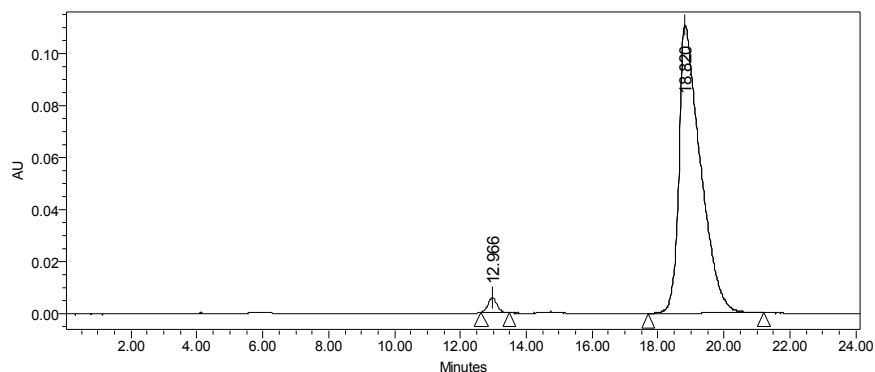

|   | Name | Retention Time | Area    | % Area | Height | Int Type |
|---|------|----------------|---------|--------|--------|----------|
| 1 |      | 12.966         | 107170  | 2.10   | 5675   | bb       |
| 2 |      | 18.820         | 4998329 | 97.90  | 110750 | bb       |

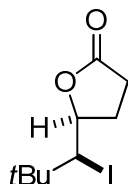

**(S)-5-[(S)-1-Iodo-2,2-dimethylpropyl]dihydrofuran-2(3H)-one (6c).** Isolated 0.028 g (99%) of **6c** as a white solid: mp 99-100 °C;  $^1\text{H}$  NMR ( $\text{CDCl}_3$ , 300 MHz)  $\delta$  4.21 (t,  $J = 7.5$  Hz, 1 H), 4.06 (s, 1 H), 2.75–2.65 (m, 1 H), 2.56–2.31 (comp, 2 H), 2.13–2.01 (m, 1 H), 1.18 (s, 9 H);  $^{13}\text{C}$  NMR ( $\text{CDCl}_3$ , 75 MHz)  $\delta$  176.6, 77.7, 60.0, 36.6, 29.6, 29.5, 27.8; IR (neat) 2960, 1768, 1463, 1352, 1176, 914  $\text{cm}^{-1}$ ; HRMS (CI)  $m/z$  calcd for  $[\text{C}_9\text{H}_{16}\text{O}_2\text{I}]^+$  (M+H), 283.0195; found 283.0196;  $[\alpha]^{25}_{\text{D}} +41.7$  ( $c = 1.0$ ,  $\text{CHCl}_3$ ); HPLC (259 nm): Whelk-O1 (20% *i*-PrOH / hexanes, 1.2 mL/min) 11.1 min (minor), 15.4 min (major); 97:3 er.

Racemic:

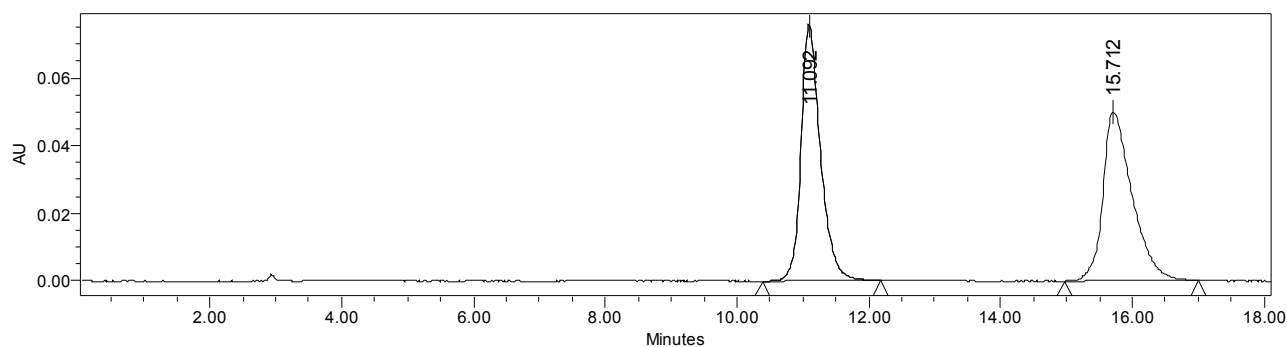

Enantiomeric:

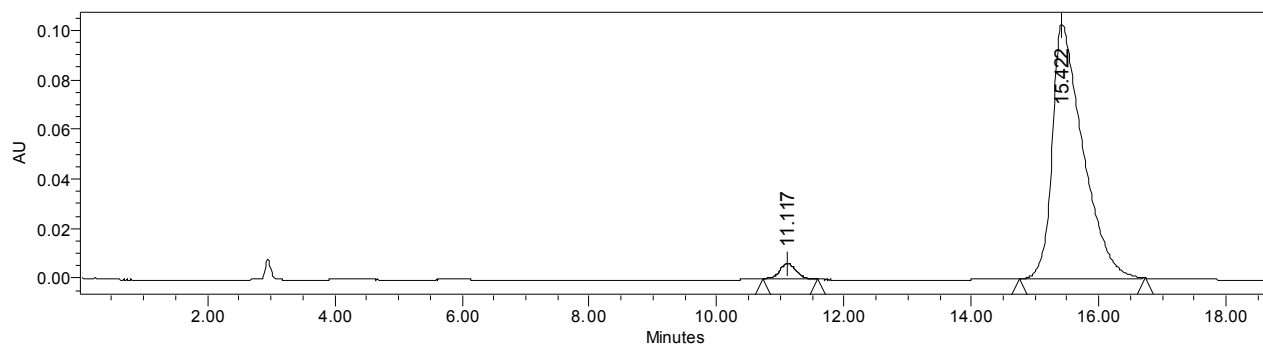

|   | Name | Retention Time | Area    | % Area | Height | Int Type |
|---|------|----------------|---------|--------|--------|----------|
| 1 |      | 11.117         | 109249  | 3.09   | 6152   | bb       |
| 2 |      | 15.422         | 3431261 | 96.91  | 102376 | bb       |

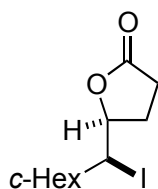

**(S)-5-[(S)-Iodo(cyclohexyl)methyl]dihydrofuran-2(3H)-one (6d).** Isolated 0.030 g (97%) of **6d** as a white solid: mp: 111-112 °C;  $^1\text{H}$  NMR ( $\text{CDCl}_3$ , 400 MHz)  $\delta$  4.31 (ddd,  $J = 7.2, 7.2, 3.2$  Hz, 1 H), 4.05 (dd,  $J = 6.0, 3.6$  Hz, 1 H), 2.76–2.68 (m, 1 H), 2.58–2.50 (m, 1 H), 2.43–2.34 (m, 1 H), 2.13–2.03 (m, 1 H), 1.99–1.96 (m, 1 H), 1.86–1.83 (m, 1 H), 1.79–1.73 (comp, 2 H), 1.68–1.63 (m, 1 H), 1.44–1.38 (m, 1 H), 1.36–1.24 (comp, 4 H), 1.21–1.07 (comp, 2 H);  $^{13}\text{C}$  NMR ( $\text{CDCl}_3$ , 100 MHz)  $\delta$  176.2, 79.8, 50.8, 43.3, 33.3, 32.7, 28.7, 28.4, 26.1, 26.0; IR (neat) 2924, 1768, 1453, 1178  $\text{cm}^{-1}$ ; HRMS (CI)  $m/z$  calcd for  $[\text{C}_{11}\text{H}_{18}\text{IO}_2]^+$  (M+H), 309.0352; found 309.0353;  $[\alpha]_D^{25} +38.0$  ( $c = 1.0, \text{CHCl}_3$ ); HPLC (259 nm): Whelk-O1 (20% *i*-PrOH / hexanes, 1.2 mL/min) 19.5 min (minor), 27.7 min (major); 98:2 er.

Racemic:

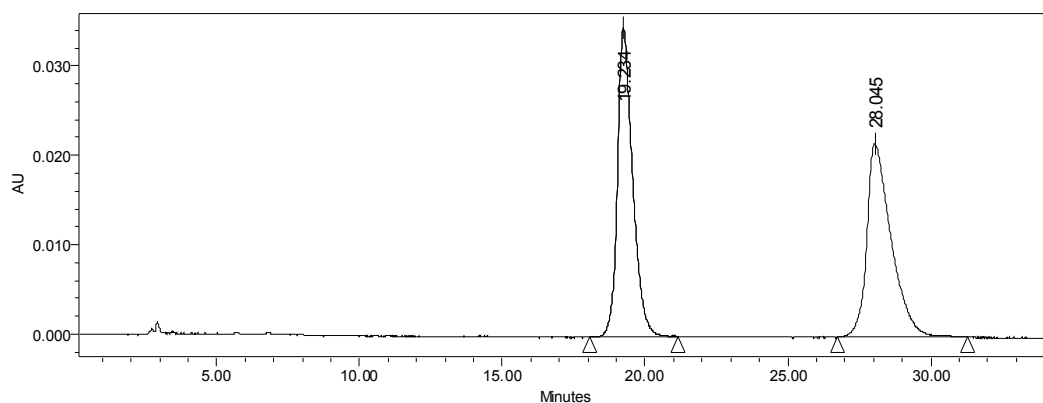

Enantiomeric:

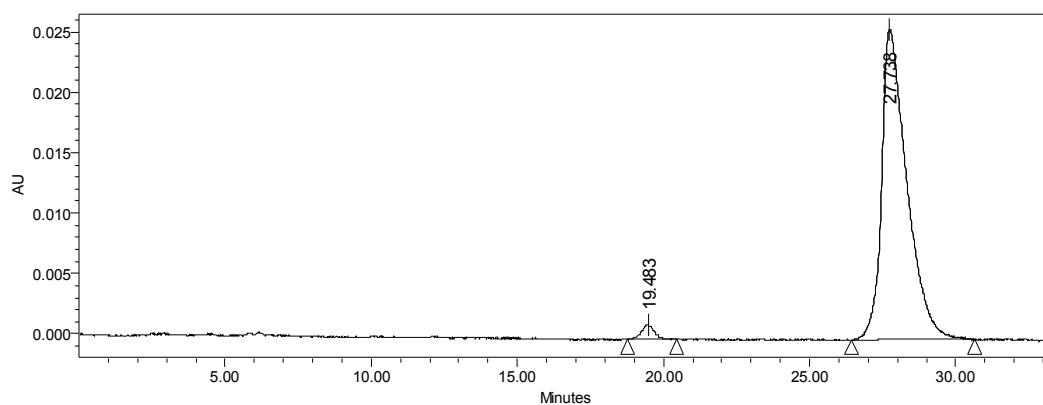

|   | Name | Retention Time | Area    | % Area | Height | Int Type |
|---|------|----------------|---------|--------|--------|----------|
| 1 |      | 19.483         | 35980   | 2.28   | 1181   | bb       |
| 2 |      | 27.738         | 1540393 | 97.72  | 25634  | bb       |

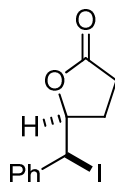

**(S)-5-[(S)-Iodo(phenyl)methyl]dihydrofuran-2(3H)-one (6e).** Isolated 0.028 g (93%) of **6e** as white solid: mp 95 °C (decomposition);  $^1\text{H}$  NMR ( $\text{CDCl}_3$ , 300 MHz)  $\delta$  7.47–7.44 (comp, 2 H), 7.33–7.30 (comp, 3 H), 5.13 (d,  $J$  = 6.0 Hz, 1 H), 4.70–4.64 (m, 1 H), 2.55–2.49 (comp, 2 H), 2.35–2.23 (m, 1 H), 2.04–1.91 (m, 1 H);  $^{13}\text{C}$  NMR ( $\text{CDCl}_3$ , 75 MHz)  $\delta$  175.7, 139.1, 128.9, 128.7, 128.5, 82.8, 34.1, 28.7, 26.9; IR (neat) 2938, 1780, 1455, 1177, 701  $\text{cm}^{-1}$ ; HRMS (ESI)  $m/z$  calcd for  $[\text{C}_{11}\text{H}_{11}\text{INaO}_2]^+$  (M+Na), 324.9696; found 324.9698;  $[\alpha]_D^{25} +123$  ( $c$  = 1.0,  $\text{CHCl}_3$ ); HPLC (214 nm): Whelk-O1 (3%  $\text{CH}_3\text{CN}$ , 20% *i*-PrOH / hexanes, 1.2 mL/min) 12.0 min (minor), 13.5 min (major); 98:2 er.

Racemic:

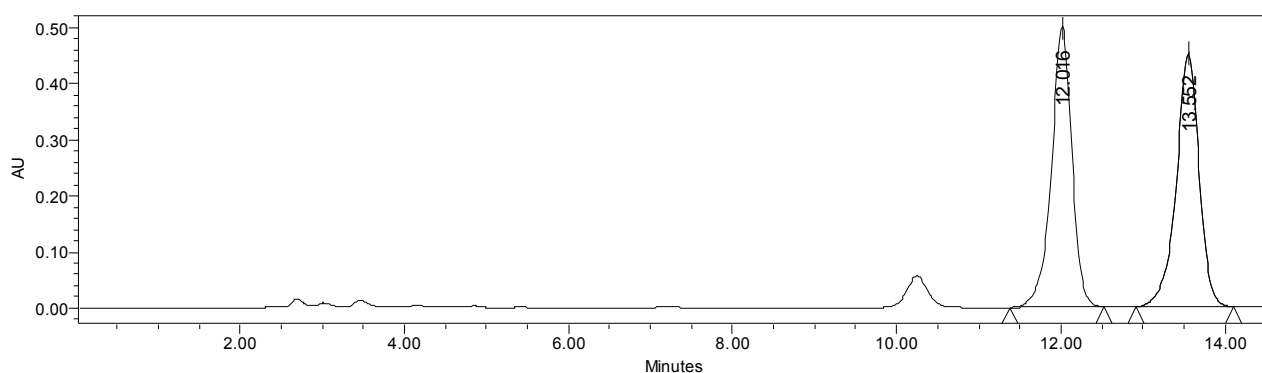

Enantiomeric:

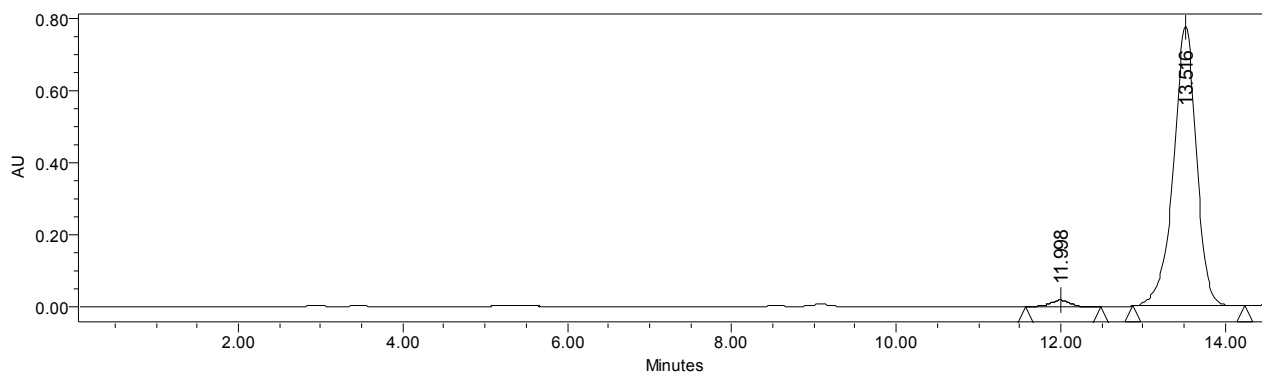

|   | Name | Retention Time | Area     | % Area | Height | Int Type |
|---|------|----------------|----------|--------|--------|----------|
| 1 |      | 11.998         | 320617   | 2.09   | 19106  | bb       |
| 2 |      | 13.516         | 15003314 | 97.91  | 777312 | bb       |

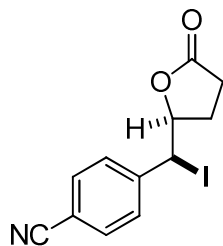

**4-((S)-Iodo[(S)-5-oxotetrahydrofuran-2-yl]methyl)benzonitrile (6f).** Isolated 0.031 g (95%) of **6f** as white solid: mp 159 °C (decomposition);  $^1\text{H}$  NMR ( $\text{CDCl}_3$ , 400 MHz)  $\delta$  7.64–7.59 (comp, 4 H), 5.15 (d,  $J = 4.4$  Hz, 1 H), 4.45 (dt,  $J = 7.6, 4.8$  Hz, 1 H), 2.69–2.54 (comp, 2 H), 2.44–2.35 (m, 1 H), 2.06–1.96 (m, 1 H);  $^{13}\text{C}$  NMR ( $\text{CDCl}_3$ , 100 MHz)  $\delta$  175.3, 144.8, 132.6, 129.3, 118.1, 112.4, 81.3, 33.0, 28.4, 27.5; IR (neat) 2956, 2230, 1775, 1606, 1182, 1025, 916  $\text{cm}^{-1}$ ; HRMS (ESI)  $m/z$  calcd for  $[\text{C}_{12}\text{H}_{10}\text{INNaO}_2]^+$  ( $\text{M}+\text{Na}$ ), 349.9648; found 349.9645;  $[\alpha]_D^{25} +180$  ( $c = 1.0$ ,  $\text{CHCl}_3$ ); HPLC (239 nm): Whelk-O1 (3%  $\text{CH}_3\text{CN}$ , 20% *i*-PrOH / hexanes, 1.2 mL/min) 22.8 min (minor), 26.2 min (major); 99:1 er.

Racemic:

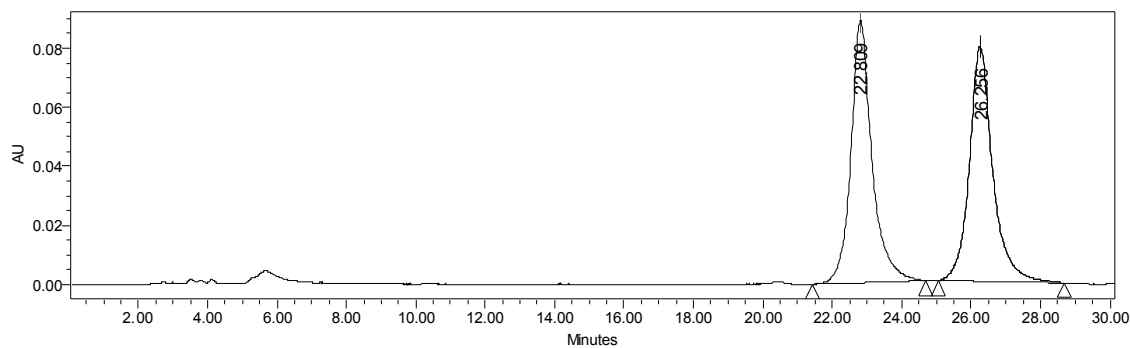

Enantiomeric:

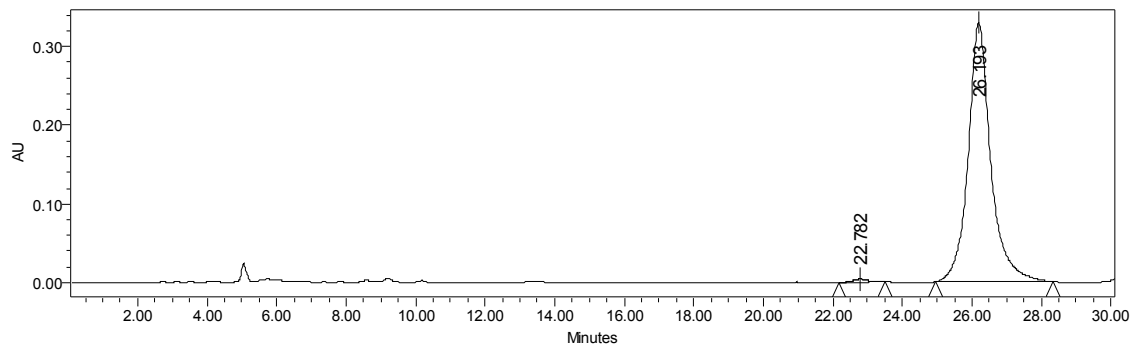

|   | Name | Retention Time | Area     | % Area | Height | Int Type |
|---|------|----------------|----------|--------|--------|----------|
| 1 |      | 22.782         | 127625   | 0.85   | 4026   | bb       |
| 2 |      | 26.193         | 14934805 | 99.15  | 328726 | bb       |

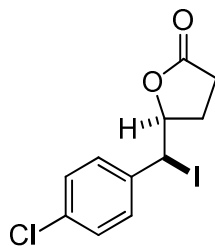

**4-((S)-Iodo[(S)-5-oxotetrahydrofuran-2-yl]methyl)benzamide (6g).** Isolated 0.030 g (89%) of **6g** as semi-solid:  $^1\text{H NMR}$  ( $\text{CDCl}_3$ , 400 MHz)  $\delta$  7.42–7.40 (comp, 2 H), 7.31–7.29 (comp, 2 H), 5.10 (d,  $J = 6.0$  Hz, 1 H), 4.54 (ddd,  $J = 7.6, 7.6, 5.2$  Hz, 1 H), 2.58–2.54 (comp, 2 H), 2.38–2.29 (m, 1 H), 2.03–1.93 (m, 1 H);  $^{13}\text{C NMR}$  ( $\text{CDCl}_3$ , 75 MHz)  $\delta$  175.5, 137.9, 134.5, 129.8, 129.1, 82.3, 33.3, 28.6, 27.1; IR (neat) 1779, 1491, 1178, 1154, 1015  $\text{cm}^{-1}$ ; HRMS (ESI)  $m/z$  calcd for  $[\text{C}_{11}\text{H}_{10}\text{ClINaO}_2]^+$  ( $\text{M}+\text{Na}$ ), 358.9306; found 358.9307;  $[\alpha]_D^{25} +141$  ( $c = 1.0$ ,  $\text{CHCl}_3$ ); HPLC (236 nm): Whelk-O1 (3%  $\text{CH}_3\text{CN}$ , 20% *i*-PrOH / hexanes, 1.2 mL/min) 12.2 min (minor), 13.7 min (major); 98:2 er.

Racemic:

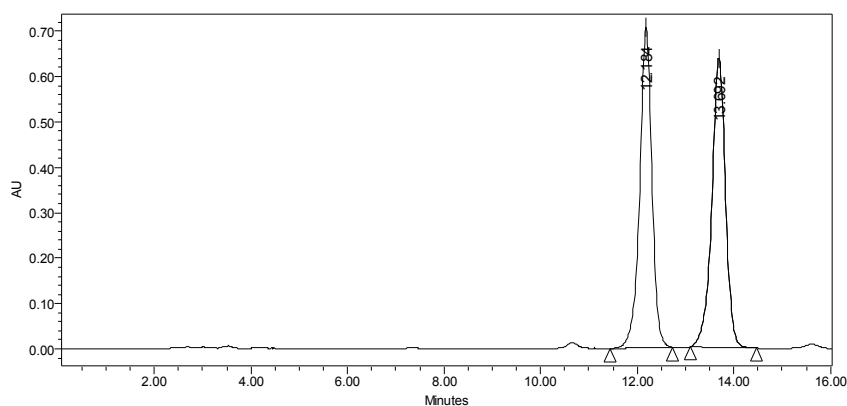

Enantiomeric:

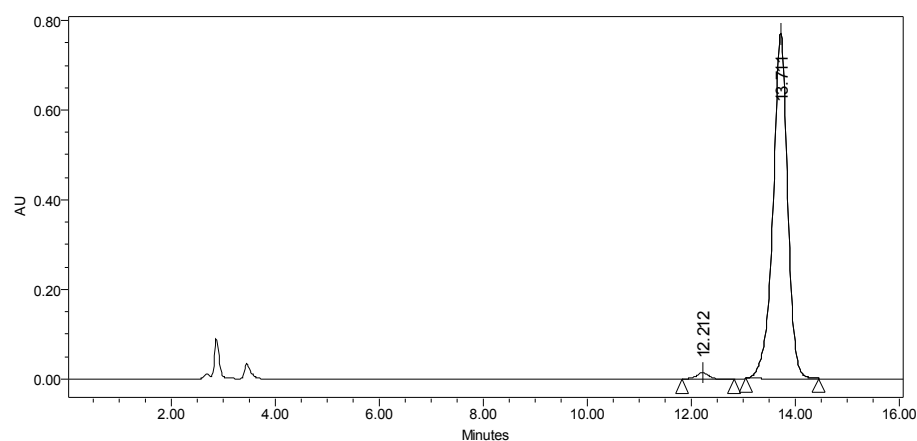

|   | Name | Retention Time | Area     | % Area | Height | Int Type |
|---|------|----------------|----------|--------|--------|----------|
| 1 |      | 12.212         | 244891   | 1.59   | 14675  | bb       |
| 2 |      | 13.711         | 15165503 | 98.41  | 771260 | bb       |



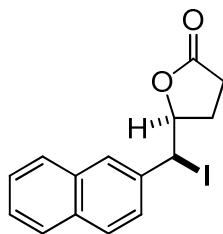

**(S)-5-[(S)-Iodo(naphthalene-2-yl)methyl]dihydrofuran-2(3H)-one (6h).** Isolated 0.033 g (94%) of **6h** as white solid: mp 87 °C (decomposition);  $^1\text{H}$  NMR ( $\text{CDCl}_3$ , 400 MHz)  $\delta$  7.87 (d,  $J = 1.6$  Hz, 1 H), 7.83–7.81 (comp, 3 H), 7.57 (dd,  $J = 8.8, 2.0$  Hz, 1 H), 7.52–7.50 (comp, 2 H), 5.29 (d,  $J = 6.0$  Hz, 1 H), 4.75 (dt,  $J = 7.2, 5.6$  Hz, 1 H), 2.59–2.54 (comp, 2 H), 2.34–2.25 (m, 1 H), 2.05–1.95 (m, 1 H);  $^{13}\text{C}$  NMR ( $\text{CDCl}_3$ , 100 MHz)  $\delta$  175.7, 136.6, 133.1, 132.9, 129.0, 128.0, 127.7, 126.9, 126.8, 126.1, 82.8, 34.8, 28.8, 27.1; IR (neat) 3054, 2920, 1779, 1174, 917, 752  $\text{cm}^{-1}$ ; HRMS (ESI)  $m/z$  calcd for  $[\text{C}_{15}\text{H}_{13}\text{INaO}_2]^+$  ( $\text{M}+\text{Na}$ ), 374.9852; found 374.9851;  $[\alpha]_D^{24} +151$  ( $c = 1.0, \text{CHCl}_3$ ); HPLC (226 nm): Whelk-O1 (3%  $\text{CH}_3\text{CN}$ , 20% *i*-PrOH / hexanes, 1.2 mL/min) 21.0 min (minor), 23.5min (major); 98:2 er.

Racemic:

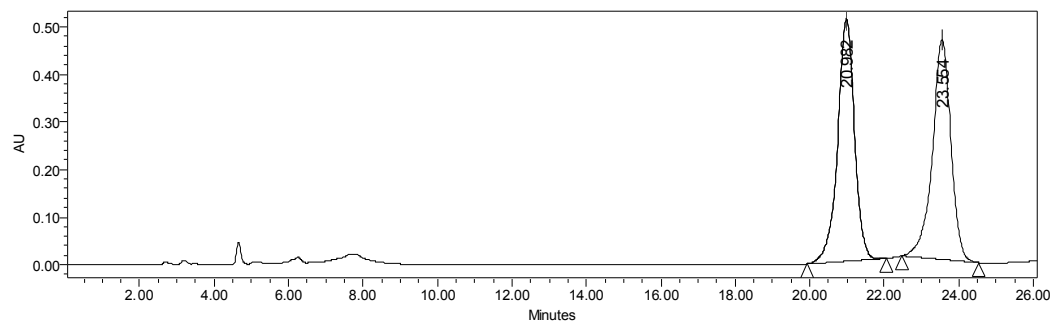

Enantiomeric:

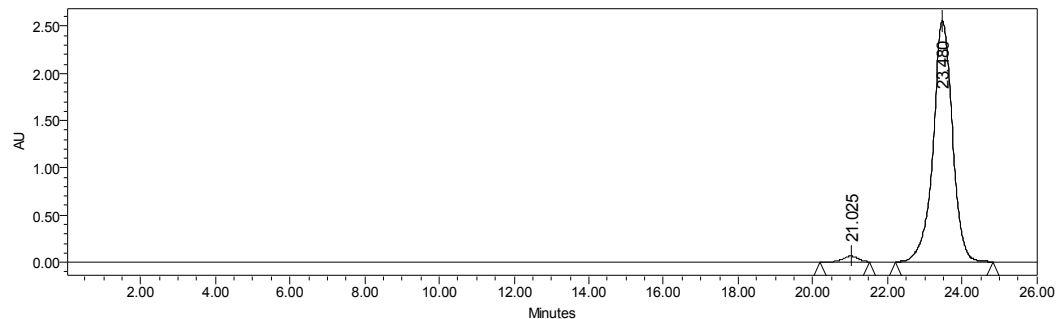

|   | Name | Retention Time | Area     | % Area | Height  | Int Type |
|---|------|----------------|----------|--------|---------|----------|
| 1 |      | 21.025         | 1891443  | 2.02   | 64208   | bb       |
| 2 |      | 23.480         | 91780163 | 97.98  | 2552433 | bb       |

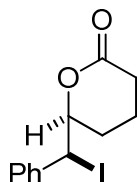

**(S)-6-[(S)-Iodo(phenyl)methyl]tetrahydro-2H-pyran-2-one (8a).** Isolated 0.028 g (89%) of **8a** as white solid: mp 97 °C (decomposition);  $^1\text{H}$  NMR ( $\text{CDCl}_3$ , 300 MHz)  $\delta$  7.47–7.44 (comp, 2 H), 7.35–7.26 (comp, 3 H), 5.07 (d,  $J = 6.3$  Hz, 1 H), 4.40 (ddd,  $J = 9.3, 6.0, 2.7$  Hz, 1 H), 2.66–2.56 (m, 1 H), 2.50–2.39 (m, 1 H), 1.98–1.80 (m, 3 H), 1.61–1.48 (m, 1 H);  $^{13}\text{C}$  NMR ( $\text{CDCl}_3$ , 75 MHz)  $\delta$  170.4, 139.7, 128.8, 128.5, 128.5, 82.9, 34.4, 29.4, 26.9, 18.1; IR (neat) 2955, 1735, 1234, 1052  $\text{cm}^{-1}$ ; HRMS (ESI)  $m/z$  calcd for  $[\text{C}_{12}\text{H}_{13}\text{INaO}_2]^+$  (M+Na), 338.9852; found 338.9850;  $[\alpha]_D^{24} +203$  ( $c = 1.0$ ,  $\text{CHCl}_3$ ); HPLC (230 nm): Whelk-O1 (20% *i*-PrOH / hexanes, 1.2 mL/min) 65.3 min (minor), 75.5 min (major); 99:1 er.

Racemic:

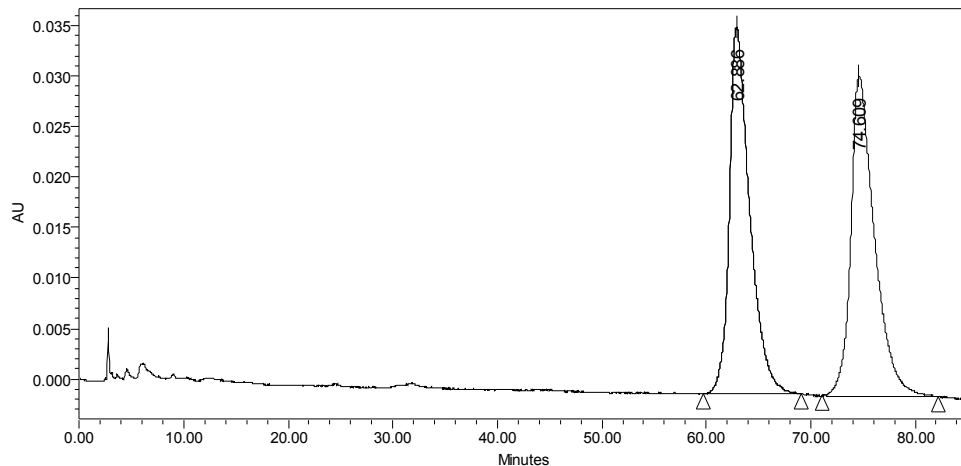

Enantiomeric:

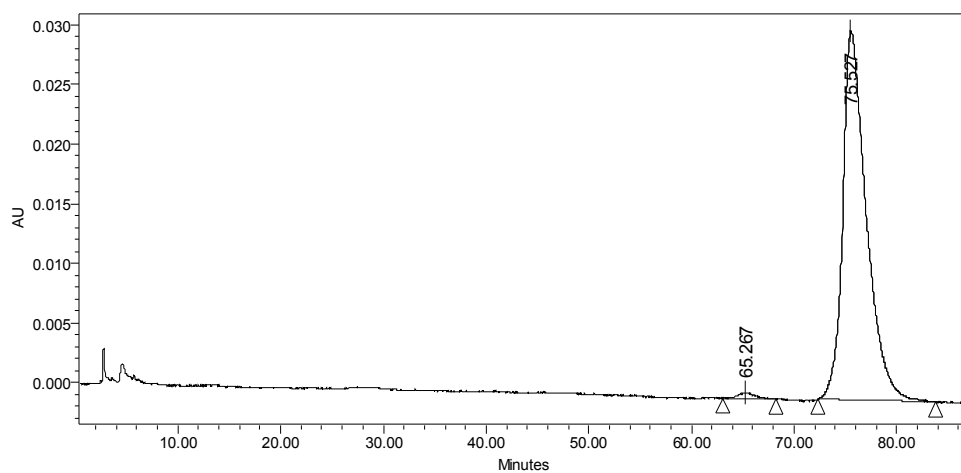

|   | Retention Time | Area    | % Area | Height | Int Type |
|---|----------------|---------|--------|--------|----------|
| 1 | 65.267         | 53655   | 1.08   | 474    | bb       |
| 2 | 75.527         | 4927341 | 98.92  | 30903  | bb       |

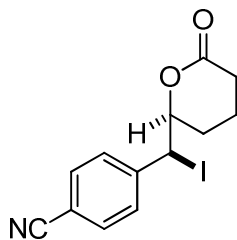

**4-((S)-Iodo[(S)-6-oxotetrahydro-2H-pyran-2-yl]methyl}benzonitrile (8b).** Isolated 0.030 g (88%) of **8b** as semi-solid:  $^1\text{H NMR}$  ( $\text{CDCl}_3$ , 300 MHz)  $\delta$  7.62 (m, 4 H), 5.07 (d,  $J = 4.8$  Hz, 1 H), 4.40 (ddd,  $J = 7.8, 4.8, 3.0$  Hz, 1 H), 2.69–2.59 (m, 1 H), 2.53–2.42 (m, 1 H), 2.05–1.86 (m, 3 H), 1.72–1.58 (m, 1 H);  $^{13}\text{C NMR}$  ( $\text{CDCl}_3$ , 75 MHz)  $\delta$  170.0, 145.0, 132.5, 129.5, 118.2, 112.3, 81.8, 32.6, 29.4, 27.6, 18.1; IR (neat) 2958, 2228, 1740, 1236, 1056  $\text{cm}^{-1}$ ; HRMS (ESI)  $m/z$  calcd for  $[\text{C}_{13}\text{H}_{12}\text{INaO}_2]^+$  ( $\text{M}+\text{Na}$ ), 363.9805; found 363.9808;  $[\alpha]_D^{24} +123$  ( $c = 1.0, \text{CHCl}_3$ ); HPLC (239 nm): Whelk-O1 (3%  $\text{CH}_3\text{CN}$ , 20% *i*-PrOH / hexanes, 1.2 mL/min) 31.6 min (minor), 34.3 min (major); 99:1 er.

Racemic:

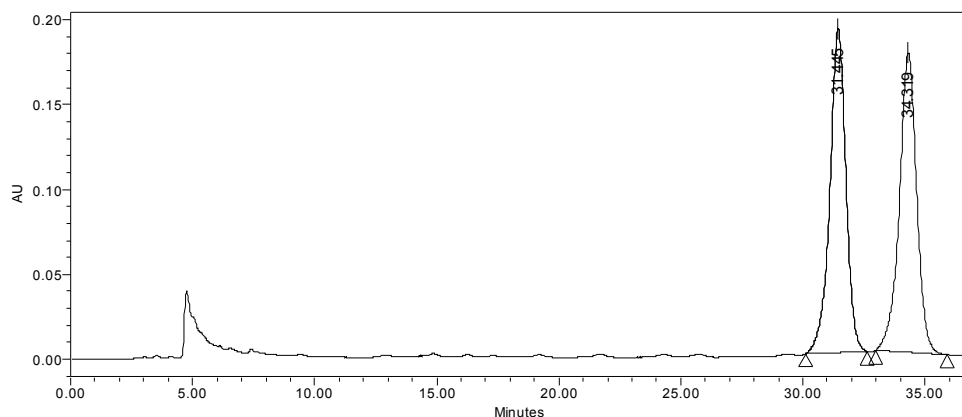

Enantiomeric:

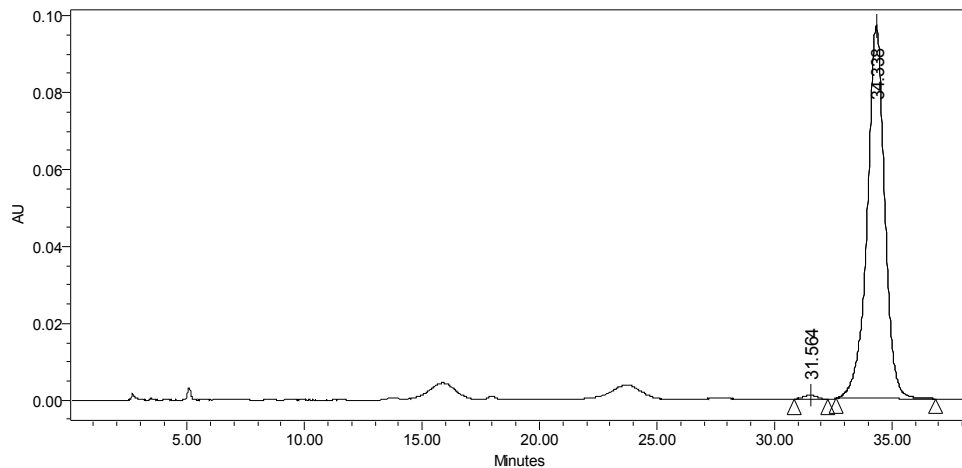

|   | Retention Time | Area    | % Area | Height | Int Type |
|---|----------------|---------|--------|--------|----------|
| 1 | 31.564         | 36009   | 0.71   | 917    | bb       |
| 2 | 34.338         | 5037000 | 99.29  | 96940  | bb       |

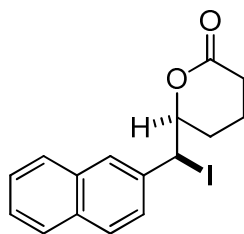

**(S)-6-[(S)-Iodo(naphthalene-2-yl)methyl]tetrahydro-2H-pyran-2-one (8c).** Isolated 0.034 g (93%) of **8c** as white solid: mp 85 °C (decomposition);  $^1\text{H}$  NMR ( $\text{CDCl}_3$ , 300 MHz)  $\delta$  7.84–7.80 (comp, 4 H), 7.59 (dd,  $J$  = 8.4, 1.8 Hz, 1 H), 7.52–7.48 (comp, 2 H), 5.25 (d,  $J$  = 6.3 Hz, 1 H), 4.53 (ddd,  $J$  = 9.6, 6.6, 3.0 Hz, 1 H), 2.67–2.57 (m, 1 H), 2.51–2.40 (m, 1 H), 1.97–1.80 (m, 3 H), 1.64–1.51 (m, 1 H);  $^{13}\text{C}$  NMR ( $\text{CDCl}_3$ , 75 MHz)  $\delta$  170.4, 137.0, 133.1, 132.9, 128.9, 128.0, 127.7, 126.8, 126.7, 126.7, 126.3, 82.9, 34.9, 29.4, 27.0, 18.1; IR (neat) 2958, 1740, 1234, 1055, 751  $\text{cm}^{-1}$ ; HRMS (ESI)  $m/z$  calcd for  $[\text{C}_{16}\text{H}_{15}\text{I}\text{NaO}_2]^+$  (M+Na), 389.0009; found 389.0011;  $[\alpha]_{\text{D}}^{23} +155$  ( $c$  = 1.0,  $\text{CHCl}_3$ ); HPLC (226 nm): Whelk-O1 (3%  $\text{CH}_3\text{CN}$ , 20% *i*-PrOH / hexanes, 1.2 mL/min) 30.6 min (minor), 42.2 min (major); 98.5:1.5 er.

Racemic:

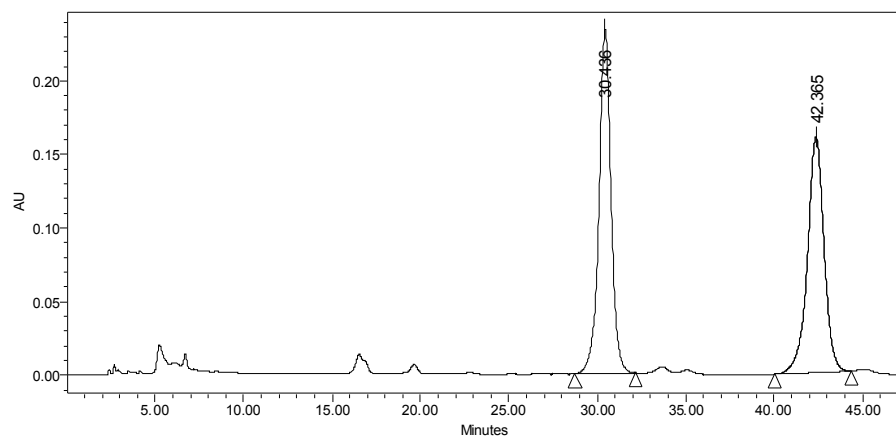

Enantiomeric:

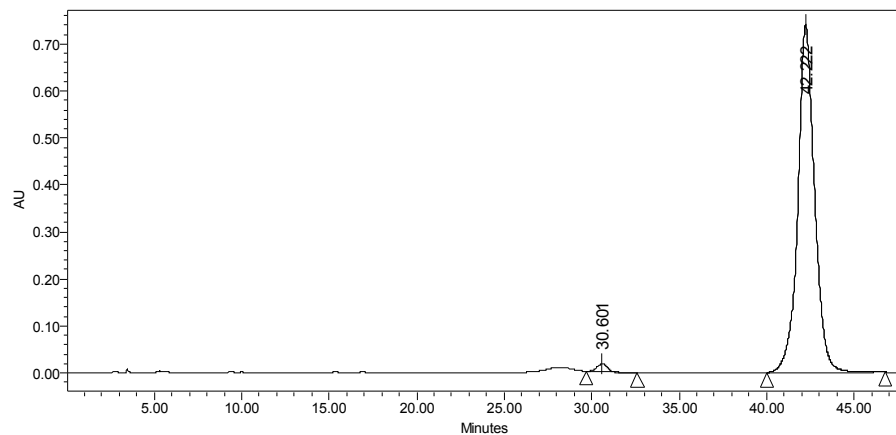

|   | Name | Retention Time | Area     | % Area | Height | Int Type |
|---|------|----------------|----------|--------|--------|----------|
| 1 |      | 30.601         | 728584   | 1.45   | 16994  | bb       |
| 2 |      | 42.222         | 49463828 | 98.55  | 739456 | bb       |

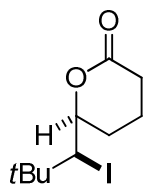

**(R)-6-[(R)-1-Iodo-2,2-dimethylpropyl]tetrahydro-2H-pyran-2-one (8d).** Isolated 0.029 (98%) of **8d** as a clear, colorless oil.  $^1\text{H}$  NMR (300 MHz;  $\text{CDCl}_3$ ):  $\delta$  4.03 (d,  $J = 1.0$  Hz, 1 H), 3.96 (dd,  $J = 10.2, 3.4$  Hz, 1 H), 2.67–2.58 (m, 1 H), 2.53–2.41 (m, 1 H), 2.09–1.78 (comp, 4 H), 1.21 (s, 9 H);  $^{13}\text{C}$  NMR (75 MHz;  $\text{CDCl}_3$ ):  $\delta$  170.5, 78.5, 58.2, 36.6, 31.1, 29.96, 29.91, 18.5; IR (neat) 2959, 1737, 1240, 1177  $\text{cm}^{-1}$ ; HRMS (CI)  $m/z$  calcd for  $[\text{C}_{10}\text{H}_{18}\text{O}_2\text{I}]^+$  (M+H), 297.0352; found 297.0354;  $[\alpha]^{23}_{\text{D}} -17$  ( $c = 1.0, \text{CHCl}_3$ ); HPLC (254 nm): Whelk-O1 (20% *i*-PrOH / hexanes, 1.2 mL/min) 13.4 min (minor), 18.2 min (major); 98:2 er.

Racemic:

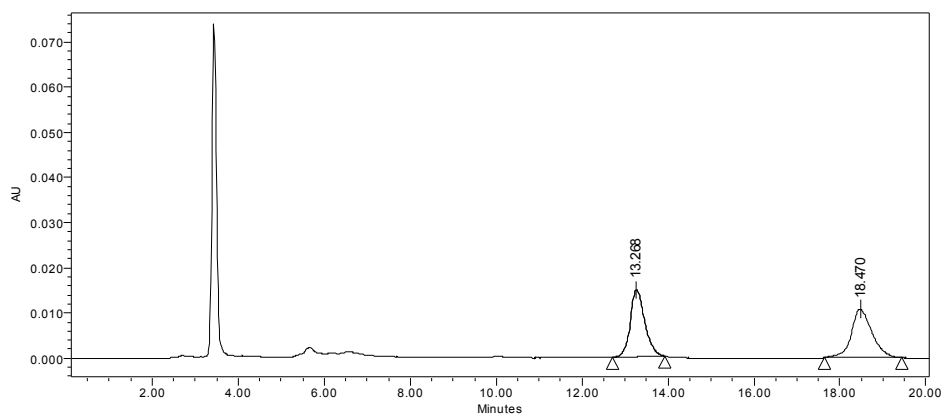

Enantiomeric:

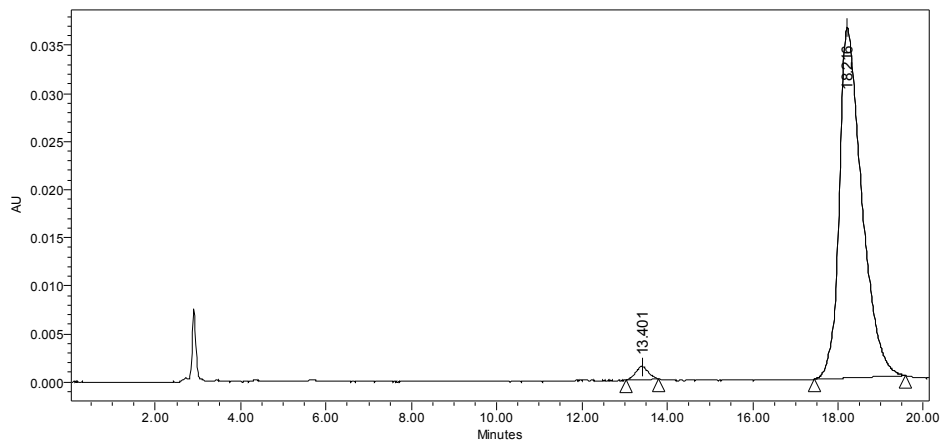

|   | Retention Time | Area    | % Area | Height | Int Type |
|---|----------------|---------|--------|--------|----------|
| 1 | 13.401         | 28276   | 2.07   | 1352   | bb       |
| 2 | 18.216         | 1339975 | 97.93  | 36429  | bb       |

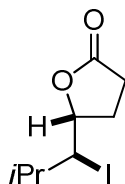

**(R)-5-[(S)-1-Iodo-2-methylpropyl]dihydrofuran-2(3H)-one (10a).** Isolated 0.021 g (78%) of **10a** as a clear, colorless oil:  $^1\text{H}$  NMR ( $\text{CDCl}_3$ , 400 MHz)  $\delta$  4.66–4.58 (m, 1 H), 4.08 (dd,  $J = 10.0, 2.8$  Hz, 1 H), 2.64–2.45 (comp, 3 H), 2.23–2.16 (m, 1 H), 1.57–1.45 (m, 1 H), 0.97 (d,  $J = 6.4$  Hz, 3 H), 0.92 (d,  $J = 6.4$  Hz, 3 H);  $^{13}\text{C}$  NMR ( $\text{CDCl}_3$ , 100 MHz)  $\delta$  176.6, 80.6, 51.4, 30.1, 29.9, 29.1, 23.6, 19.0; IR (neat)  $1783\text{ cm}^{-1}$ ; HRMS (ESI)  $m/z$  calcd for  $[\text{C}_8\text{H}_{13}\text{INaO}_2]^+$  (M+Na), 290.9852; found 290.9851;  $[\alpha]_D^{23} +14.0$  ( $c = 0.5$ ,  $\text{CHCl}_3$ ); HPLC (259 nm): OD-H (0.75% *i*-PrOH / hexanes, 1.0 mL/min) 26.5 min (major), 28.2 min (minor); 67:33 er.

Racemic:

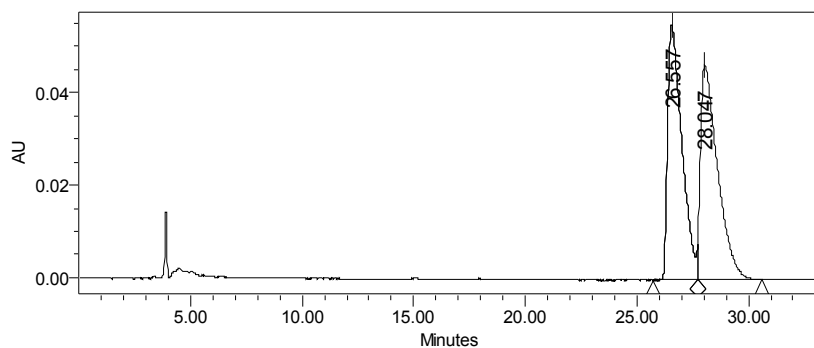

Enantiomeric:

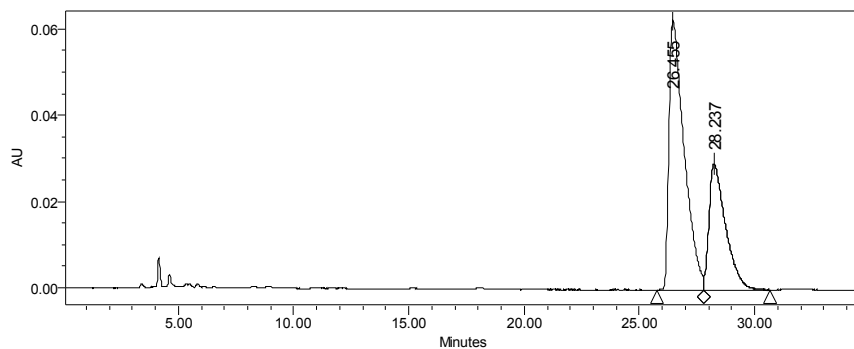

|   | Name | Retention Time | Area    | % Area | Height | Int Type |
|---|------|----------------|---------|--------|--------|----------|
| 1 |      | 26.455         | 2875482 | 66.36  | 62425  | bv       |
| 2 |      | 28.237         | 1457571 | 33.64  | 29208  | vb       |

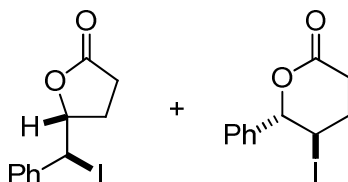

**(R)-5-[(S)-Iodo(phenyl)methyl]dihydrofuran-2(3H)-one (10b)** and **(5R, 6S)-5-Iodo-6-phenyltetrahydro-2H-pyran-2-one (11b)**. Isolated 0.027 g (89%) of **10b** and **11b** as a white solid, and the yields of **10b** and **11b** were based on NMR integrals:  $^1\text{H}$  NMR ( $\text{CDCl}_3$ , 400 MHz)  $\delta$  7.43–7.39 (comp, 2.4 H), 7.34–7.26 (comp, 2.6 H), 5.56 (d,  $J = 8.0$  Hz, 0.4 H), 5.12 (d,  $J = 8.0$  Hz, 0.6 H), 4.92–4.87 (m, 0.6 H), 4.42 (ddd,  $J = 8.0, 8.0, 4.4$  Hz, 0.4 H), 2.90–2.82 (m, 0.4 H), 2.76–2.65 (m, 0.4 H), 2.65–2.62 (m, 0.4 H), 2.62–2.53 (comp, 1.2 H), 2.50–2.39 (comp, 1.2 H), 2.20–2.10 (m, 0.4 H); HPLC (214 nm): Whelk-O1 (3%  $\text{CH}_3\text{CN}$ , 20% *i*-PrOH / hexanes, 1.2 mL/min) **10b**: 13.8 min (minor), 15.2 (major); 52:48 er; **11b**: 16.0 min (minor), 25.4 min (major); 95:5 er.

Racemic:

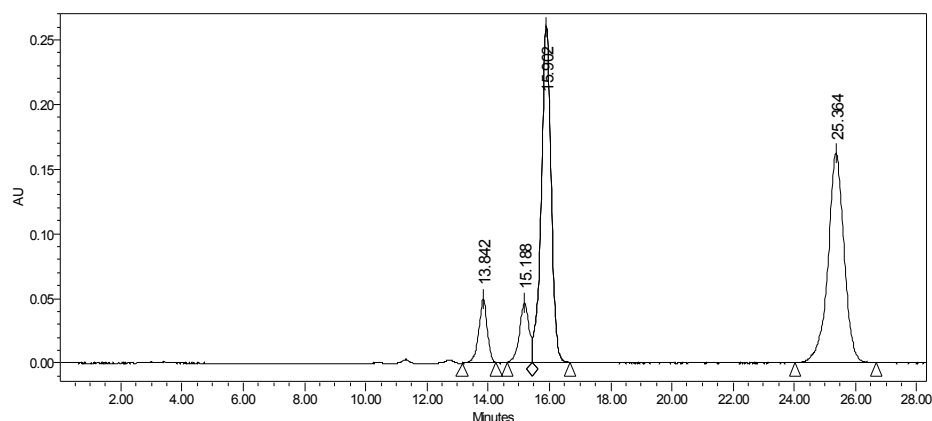

Enantiomeric:

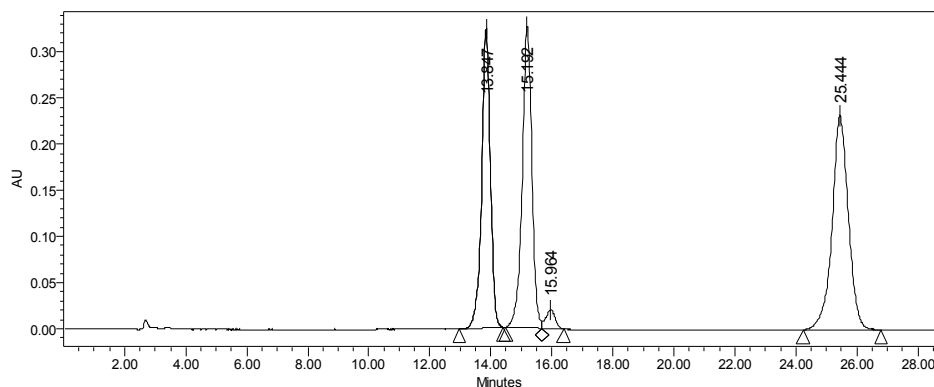

|   | Retention Time | Area    | % Area | Height | Int Type |
|---|----------------|---------|--------|--------|----------|
| 1 | 13.847         | 6430258 | 28.51  | 324294 | bb       |
| 2 | 15.192         | 7087469 | 31.43  | 326686 | bv       |
| 3 | 15.964         | 429636  | 1.91   | 20161  | vb       |
| 4 | 25.444         | 8603098 | 38.15  | 231936 | bb       |

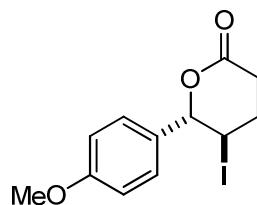

**(5R,6S)-5-Iodo-6-(4-methoxyphenyl)tetrahydro-2H-pyran-2-one (11c).** Isolated 0.030 g (89%) of **11c** as a clear, colorless oil:  $^1\text{H}$  NMR ( $\text{CDCl}_3$ , 400 MHz)  $\delta$  7.28–7.22 (m, 2 H), 6.94–6.88 (m, 2 H), 5.48 (d,  $J = 8.2$  Hz, 1 H), 4.39 (app dt,  $J = 8.2, 4.8$  Hz, 1 H), 3.82 (s, 3 H), 2.87–2.78 (m, 1 H), 2.74–2.65 (m, 1 H), 2.55–2.35 (comp, 2 H);  $^{13}\text{C}$  NMR ( $\text{CDCl}_3$ , 100 MHz)  $\delta$  169.4, 160.1, 129.8, 128.2, 114.0, 86.8, 55.3, 31.0, 30.7, 24.8; IR (neat)  $1738\text{ cm}^{-1}$ ; HRMS (ESI)  $m/z$  calcd for  $[\text{C}_{12}\text{H}_{14}\text{O}_3\text{I}]^+$  (M+H), 332.9988; found 332.9982; HPLC (229 nm): Whelk-O1 (6%  $\text{CH}_3\text{CN}$ , 20% *i*-PrOH / hexanes, 1.2 mL/min) 15.2 min (minor), 25.0 min (major); 86.5:13.5 er.

Racemic:

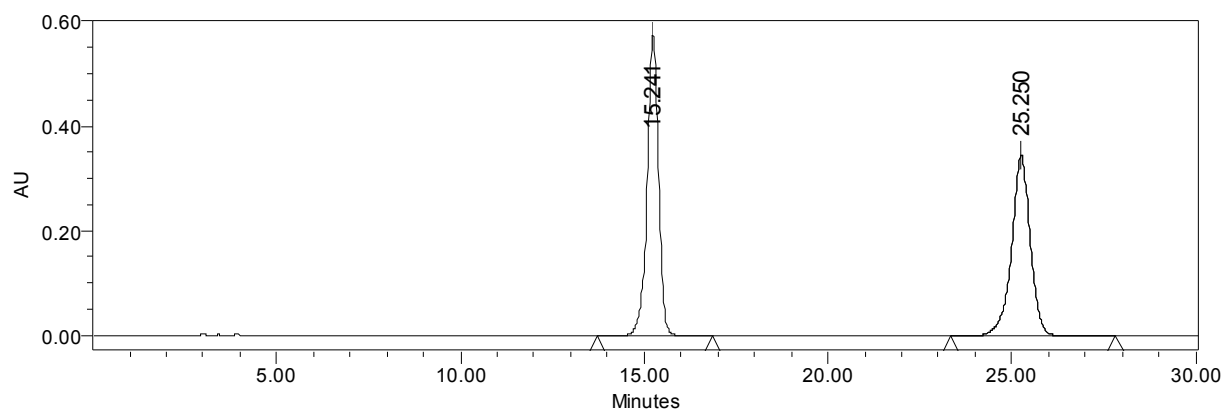

Enantiomeric:

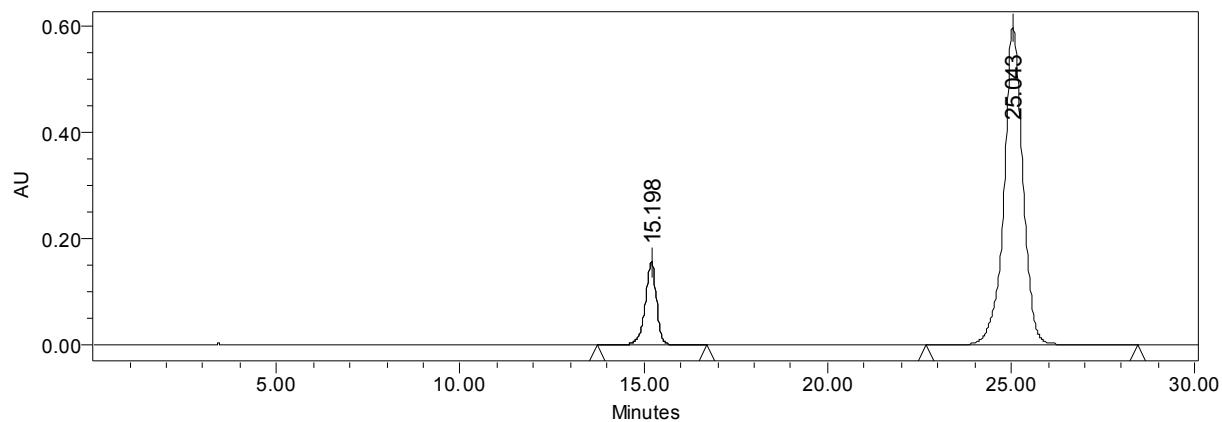

|   | Retention Time | Area     | % Area | Height | Int Type |
|---|----------------|----------|--------|--------|----------|
| 1 | 15.198         | 3298979  | 13.50  | 155763 | bb       |
| 2 | 25.043         | 21129997 | 86.50  | 596482 | bb       |



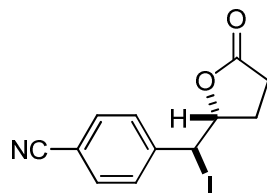

**4-((S)-Iodo[(R)-5-oxotetrahydrofuran-2-yl]methyl)benzonitrile (10d).** Reaction run in 1:1 CH<sub>2</sub>Cl<sub>2</sub>/tol for 14 h at –20 °C and 48 h at –10 °C on a 0.1 mmol scale, to give 0.031 g (94%) of **10d** as a clear, colorless oil: <sup>1</sup>H NMR (CDCl<sub>3</sub>, 400 MHz) δ 7.64–7.60 (m, 2 H), 7.54–7.49 (m, 2 H), 5.02 (d, *J* = 9.2 Hz, 1 H), 5.02–4.92 (m, 1 H), 2.77–2.67 (m, 1 H), 2.65–2.58 (comp, 2 H), 2.18–2.06 (m, 1 H); <sup>13</sup>C NMR (CDCl<sub>3</sub>, 10 MHz) δ 175.6, 144.7, 132.7, 128.8, 118.2, 112.3, 81.9, 31.1, 29.3, 29.2; IR (neat) 2229, 1778 cm<sup>-1</sup>; HRMS (ESI) *m/z* calcd for [C<sub>12</sub>H<sub>11</sub>NO<sub>2</sub>I]<sup>+</sup> (M+H), 327.9835; found 327.9836; [α]<sub>D</sub><sup>25</sup> +3.0 (c = 0.1, CHCl<sub>3</sub>); HPLC (239 nm): Whelk-O1 (6% CH<sub>3</sub>CN, 20% *i*-PrOH / hexanes, 1.2 mL/min) 17.4 min (major), 20.9 min (minor); 58:42 er.

Racemic:

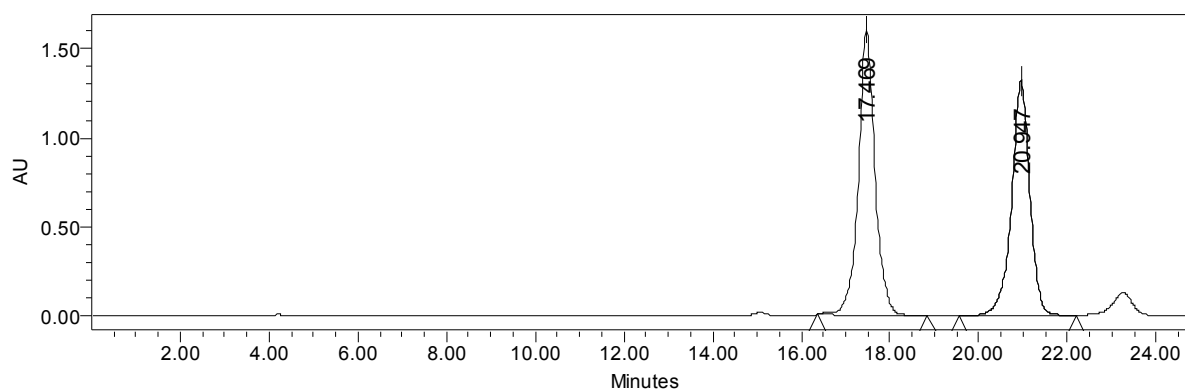

Enantiomeric:

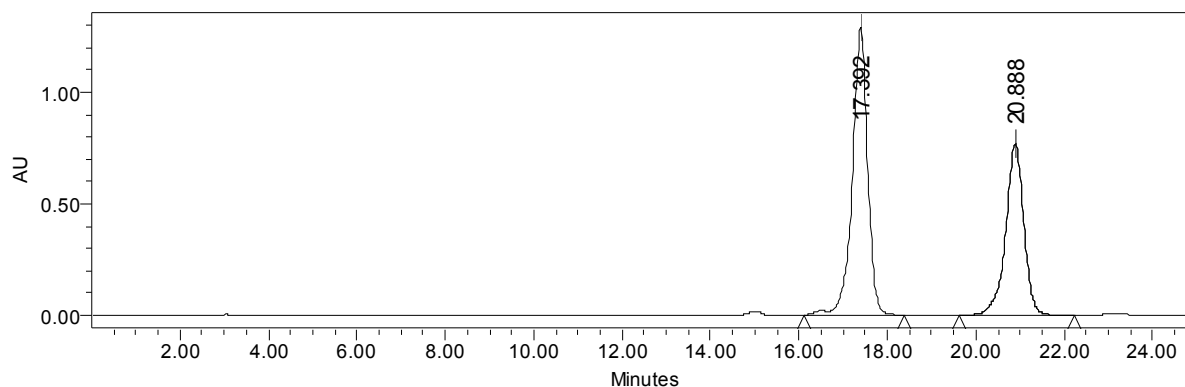

|   | Retention Time | Area     | % Area | Height  | Int Type |
|---|----------------|----------|--------|---------|----------|
| 1 | 17.392         | 29957461 | 57.96  | 1284830 | bb       |
| 2 | 20.888         | 21728455 | 42.04  | 768032  | bb       |

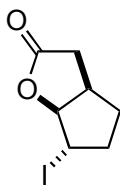

**(3aR, 6S, 6aS)-6-Iodohexahydro-2H-cyclopenta[b]furan-2-one (13).** Isolated 0.011 (44%) of **13** as a colorless oil.  $^1\text{H}$  NMR (400 MHz;  $\text{CDCl}_3$ ):  $\delta$  5.21 (d,  $J = 5.6$  Hz, 1 H), 4.48 (d,  $J = 4.4$  Hz, 1 H), 3.20–3.14 (m, 1 H), 2.90 (dd,  $J = 18.4, 10.4$  Hz, 1 H), 2.51–2.43 (m, 1 H), 2.38 (dd,  $J = 18.4, 2.0$  Hz, 1 H), 2.20–2.11 (m, 1 H), 2.08–2.03 (m, 1 H), 1.63–1.58 (m, 1 H);  $^{13}\text{C}$  NMR (100 MHz;  $\text{CDCl}_3$ ):  $\delta$  176.6, 92.4, 36.1, 34.6, 32.1, 29.4; IR (neat) 2960, 1778, 1159, 1002  $\text{cm}^{-1}$ ; HRMS (CI)  $m/z$  calcd for  $[\text{C}_7\text{H}_{10}\text{O}_2\text{I}]^+$  (M+H) $^+$ , 252.9726; found 252.9728;  $[\alpha]_D^{21} +25.2$  ( $c = 1.31, \text{CH}_2\text{Cl}_2$ ); HPLC (260 nm): Whelk-O1 (20% *i*-PrOH / hexanes, 1.2 mL/min) 17.8 min (minor), 19.6 min (major); 83:17 er.

Racemic:

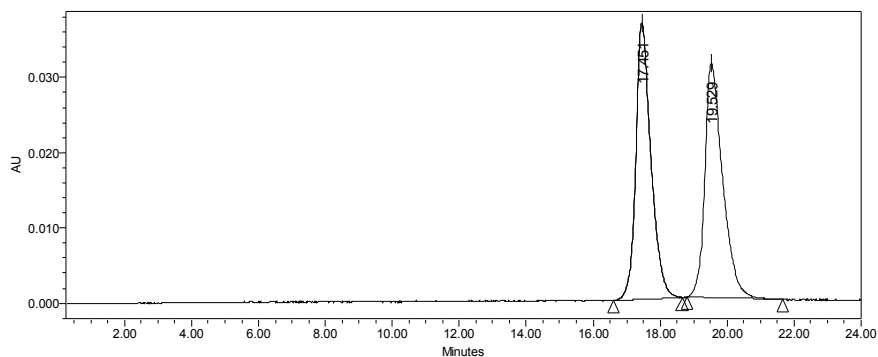

Enantiomeric:

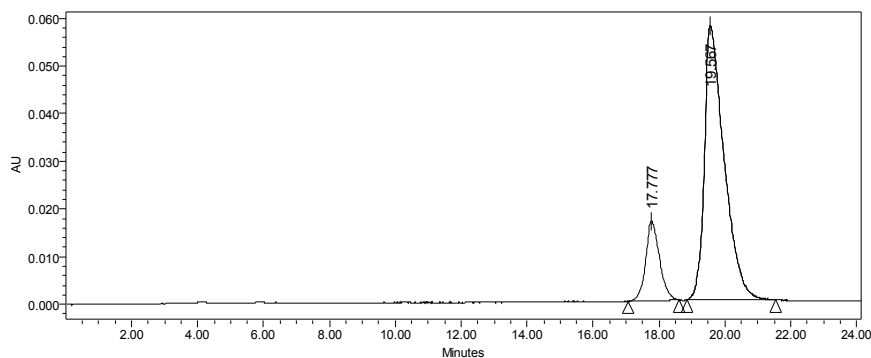

|   | Retention Time | Area    | % Area | Height | Int Type |
|---|----------------|---------|--------|--------|----------|
| 1 | 17.777         | 489414  | 16.94  | 16688  | bb       |
| 2 | 19.567         | 2400492 | 83.06  | 57485  | bb       |

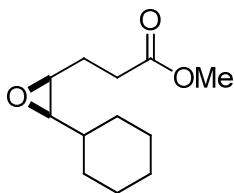

**Methyl 3-((2*S*, 3*R*)-3-cyclohexyloxiran-2-yl)propanoate (**14**).** To a stirred solution of **6d** (0.025 g, 0.081 mmol) in MeOH (1.6 mL) at room temperature was added Cs<sub>2</sub>CO<sub>3</sub> (0.053 g, 0.162 mmol), and the resulting solution was stirred for 38 h before saturated NH<sub>4</sub>Cl solution (2 mL) was added. The mixture was extracted with EtOAc (3 × 5 mL), and the combined organic layers were washed with brine (5 mL), dried (Na<sub>2</sub>SO<sub>4</sub>), filtered, and concentrated. The crude residue was purified by column chromatography, eluting with hexanes/EtOAc (10:1, v/v) to give 0.015 g (87%) of **14** as a clear, colorless oil: <sup>1</sup>H NMR (300 MHz; CDCl<sub>3</sub>): δ 3.70 (s, 3 H), 3.00–2.94 (m, 1 H), 2.68–2.64 (m, 1 H), 2.56–2.49 (comp, 2 H), 2.03–1.92 (comp, 2 H), 1.80–1.68 (comp, 4 H), 1.60–1.59 (m, 1 H), 1.26–1.07 (comp, 6 H); <sup>13</sup>C NMR (75 MHz; CDCl<sub>3</sub>): δ 173.4, 61.9, 56.1, 51.7, 36.5, 31.2, 30.7, 28.9, 26.2, 25.5, 25.4, 23.5; IR (neat) 2927, 2852, 1741, 1449, 1174 cm<sup>-1</sup>; HRMS (ESI) *m/z* calcd for [C<sub>12</sub>H<sub>20</sub>NaO<sub>3</sub>]<sup>+</sup> (M+Na)<sup>+</sup>, 235.1305; found 235.1304; [α]<sub>D</sub><sup>25</sup> -28.7 (c = 0.5, CHCl<sub>3</sub>); HPLC (214 nm): Whelk-O1 (10% *i*-PrOH / hexanes, 1.2 mL/min) 15.8 min (minor), 17.2 min (major); 97.5:2.5 er.

Racemic:

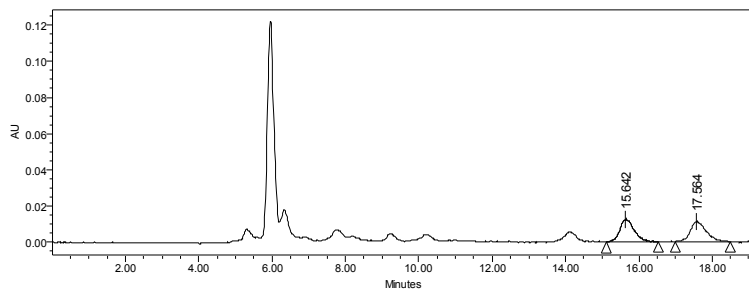

Enantiomeric:

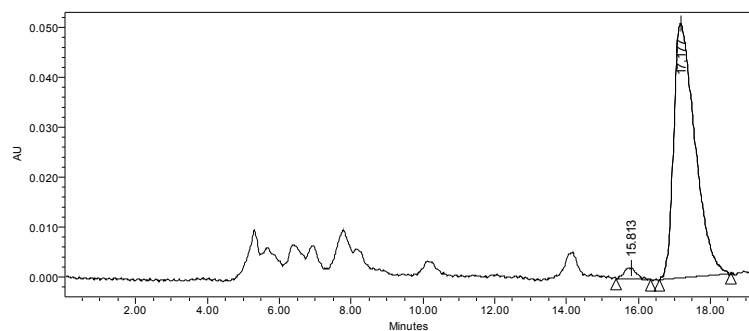

|   | Retention Time | Area    | % Area | Height | Int Type |
|---|----------------|---------|--------|--------|----------|
| 1 | 15.813         | 55000   | 2.55   | 2320   | bb       |
| 2 | 17.177         | 2105995 | 97.45  | 51108  | bb       |



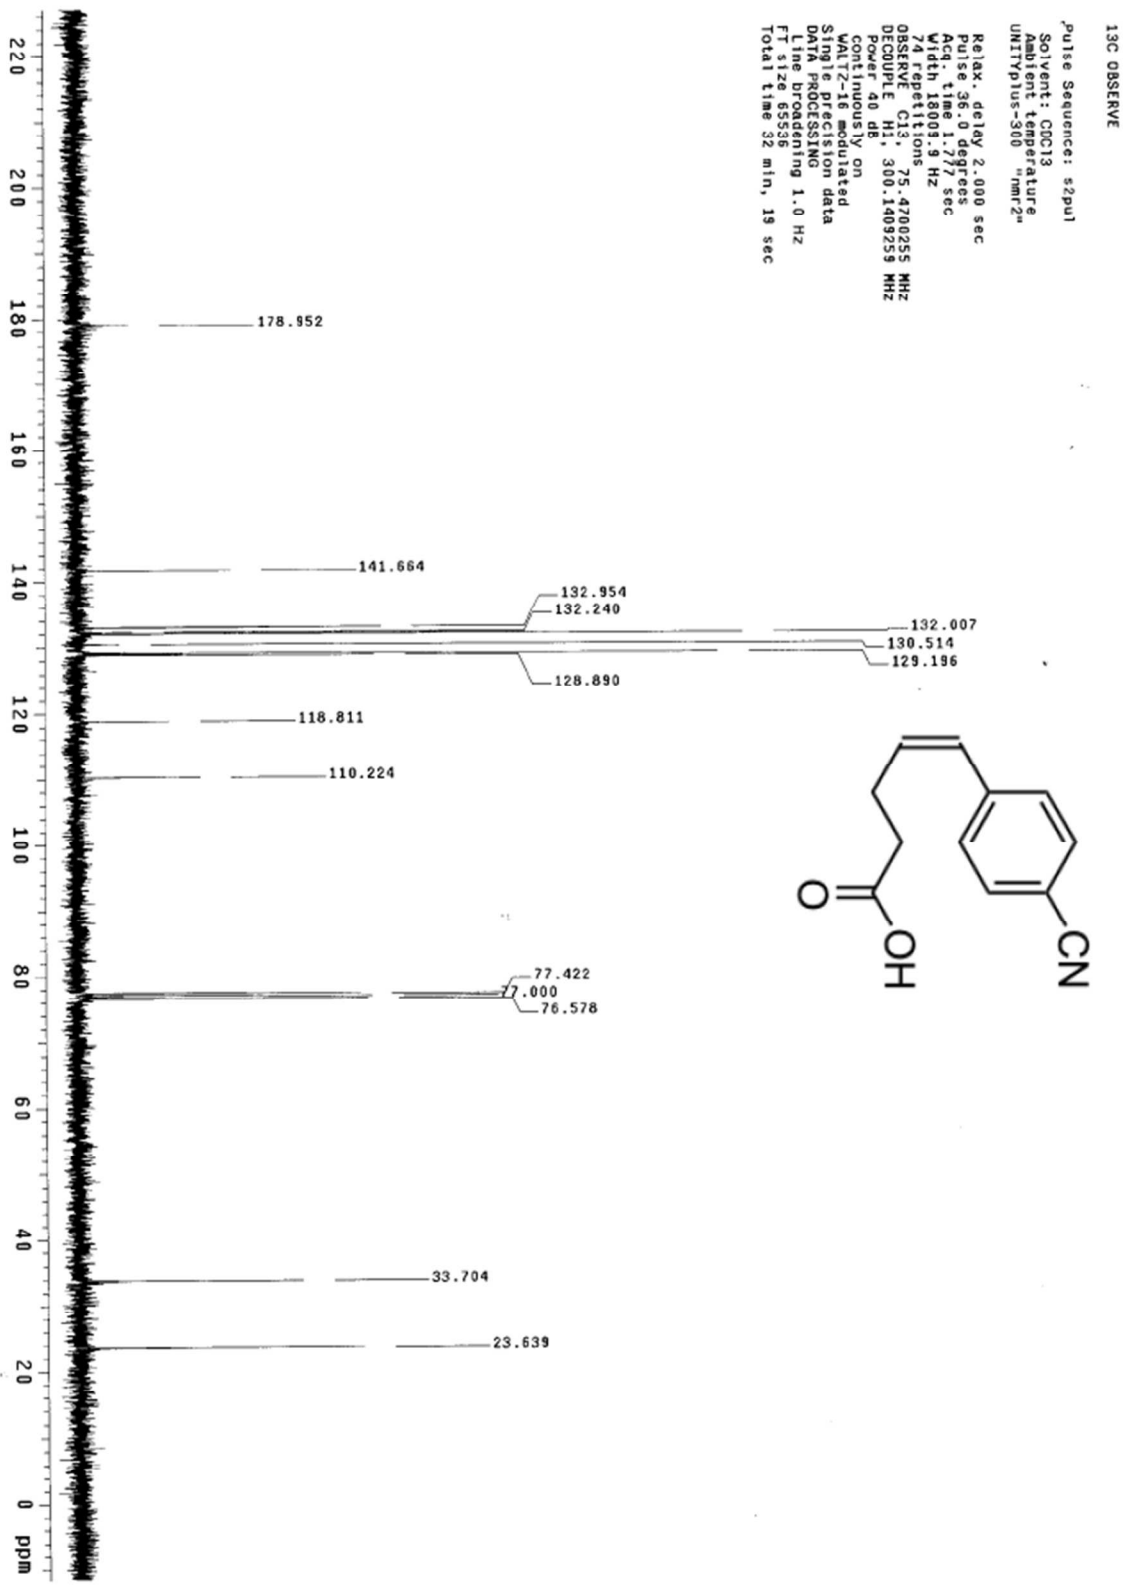

Figure S-2 <sup>13</sup>C NMR of Compound 5f

STANDARD 1H OBSERVE  
Pulse Sequence: s2pu1  
Solvent: CDCl3  
Ambient temperature  
UNITYplus-300 "nmr2"  
Relax. delay 1.000 sec  
Pulse 15.0 degrees  
Acq. time 3.813 sec  
Width 4196.4 Hz  
16 repetitions  
OBSERVE H1, 300.1390354 MHz  
DATA PROCESSING  
Line broadening 0.1 Hz  
FT size 32768  
Total time 1 min, 17 sec

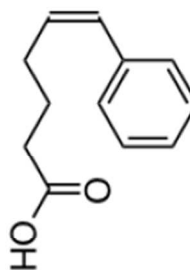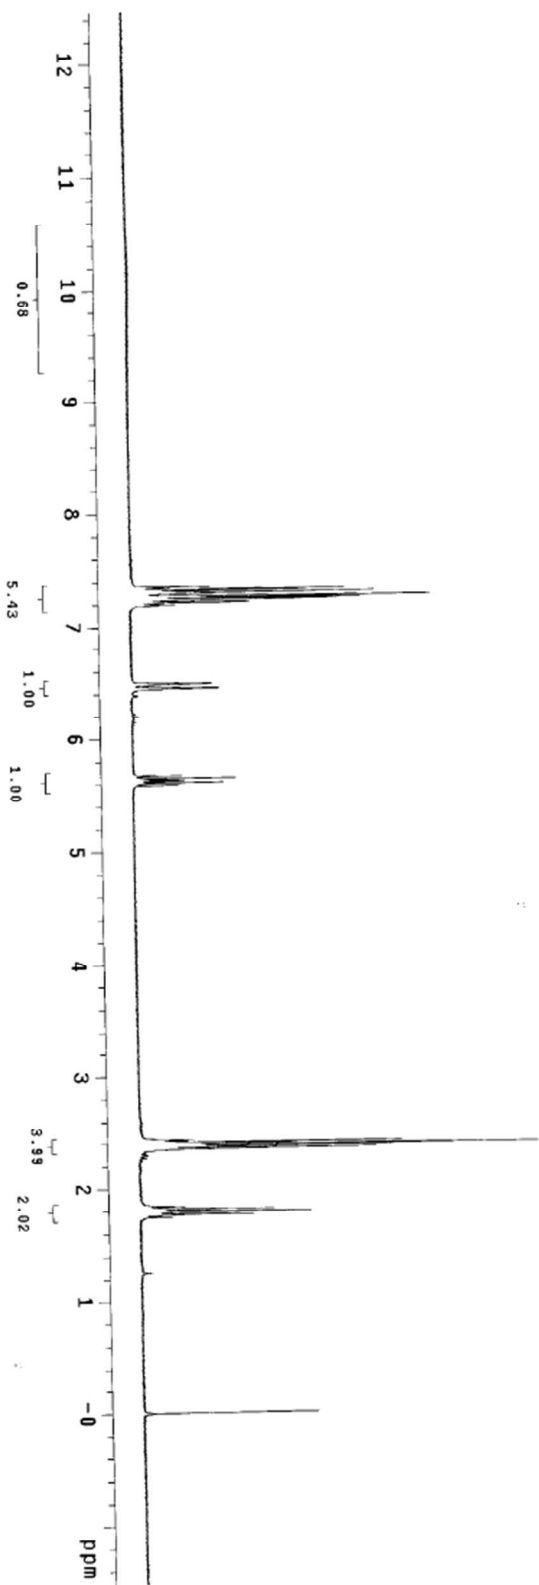

Figure S-3 <sup>1</sup>H NMR of Compound 7a

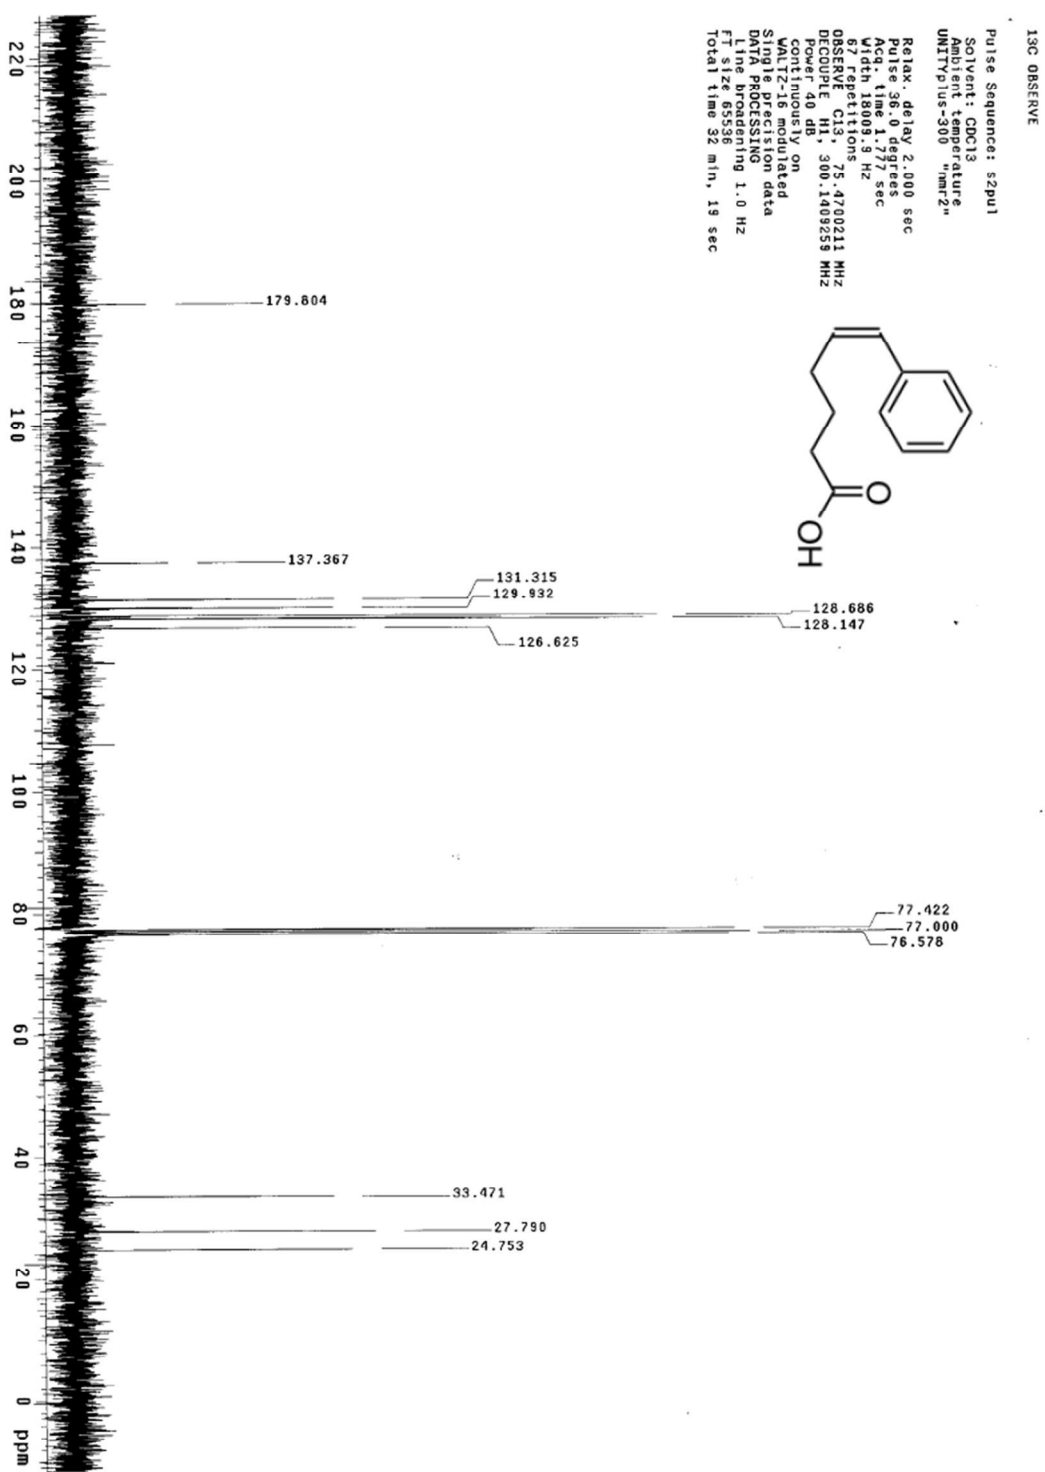

Figure S-4 <sup>13</sup>C NMR of Compound 7a

STANDARD 1H OBSERVE

Pulse Sequence: s2pu1  
 Solvent: CDCl3  
 Ambient temperature  
 UNITYplus-300 "nmr2"

Relax. delay 1.000 sec  
 Pulse 15.0 degrees  
 Acq. time 3.813 sec  
 Width 4196.4 Hz  
 16 Repetitions  
 OBSERVE 00.1390295 MHZ  
 DATA PROCESSING  
 F1 size 32768  
 Total time 1 min, 17 sec

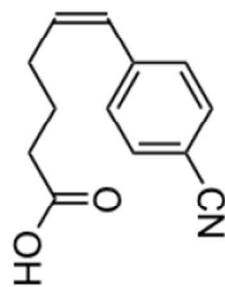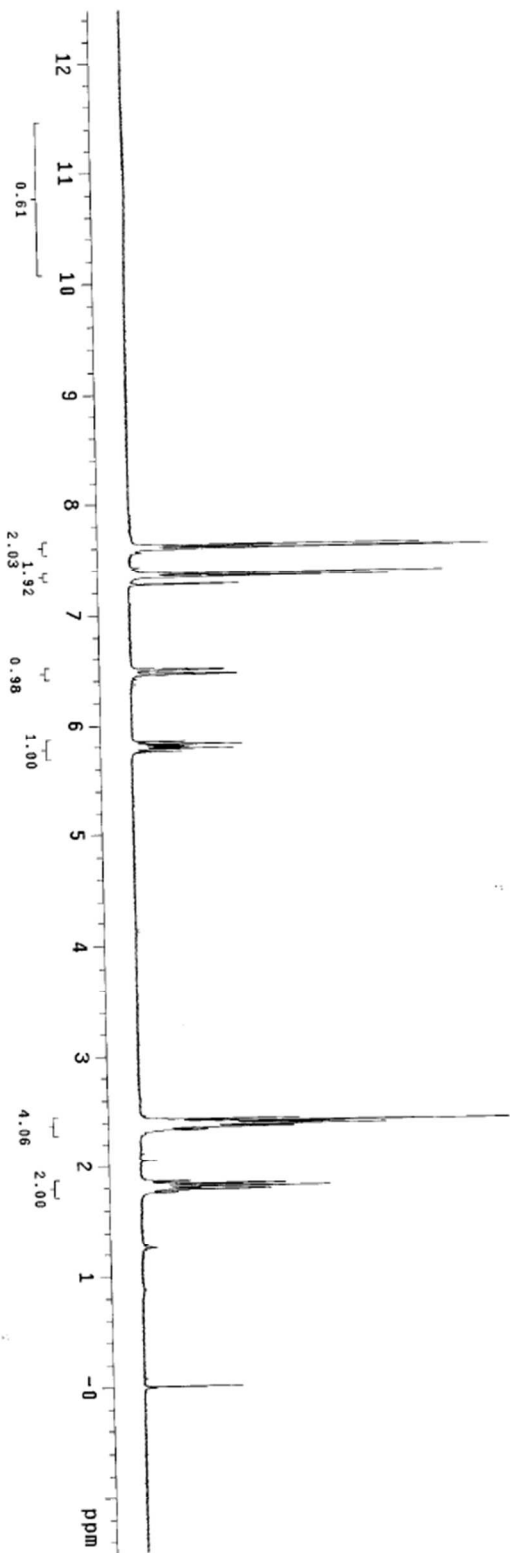

Figure S-5 <sup>1</sup>H NMR of Compound 7b



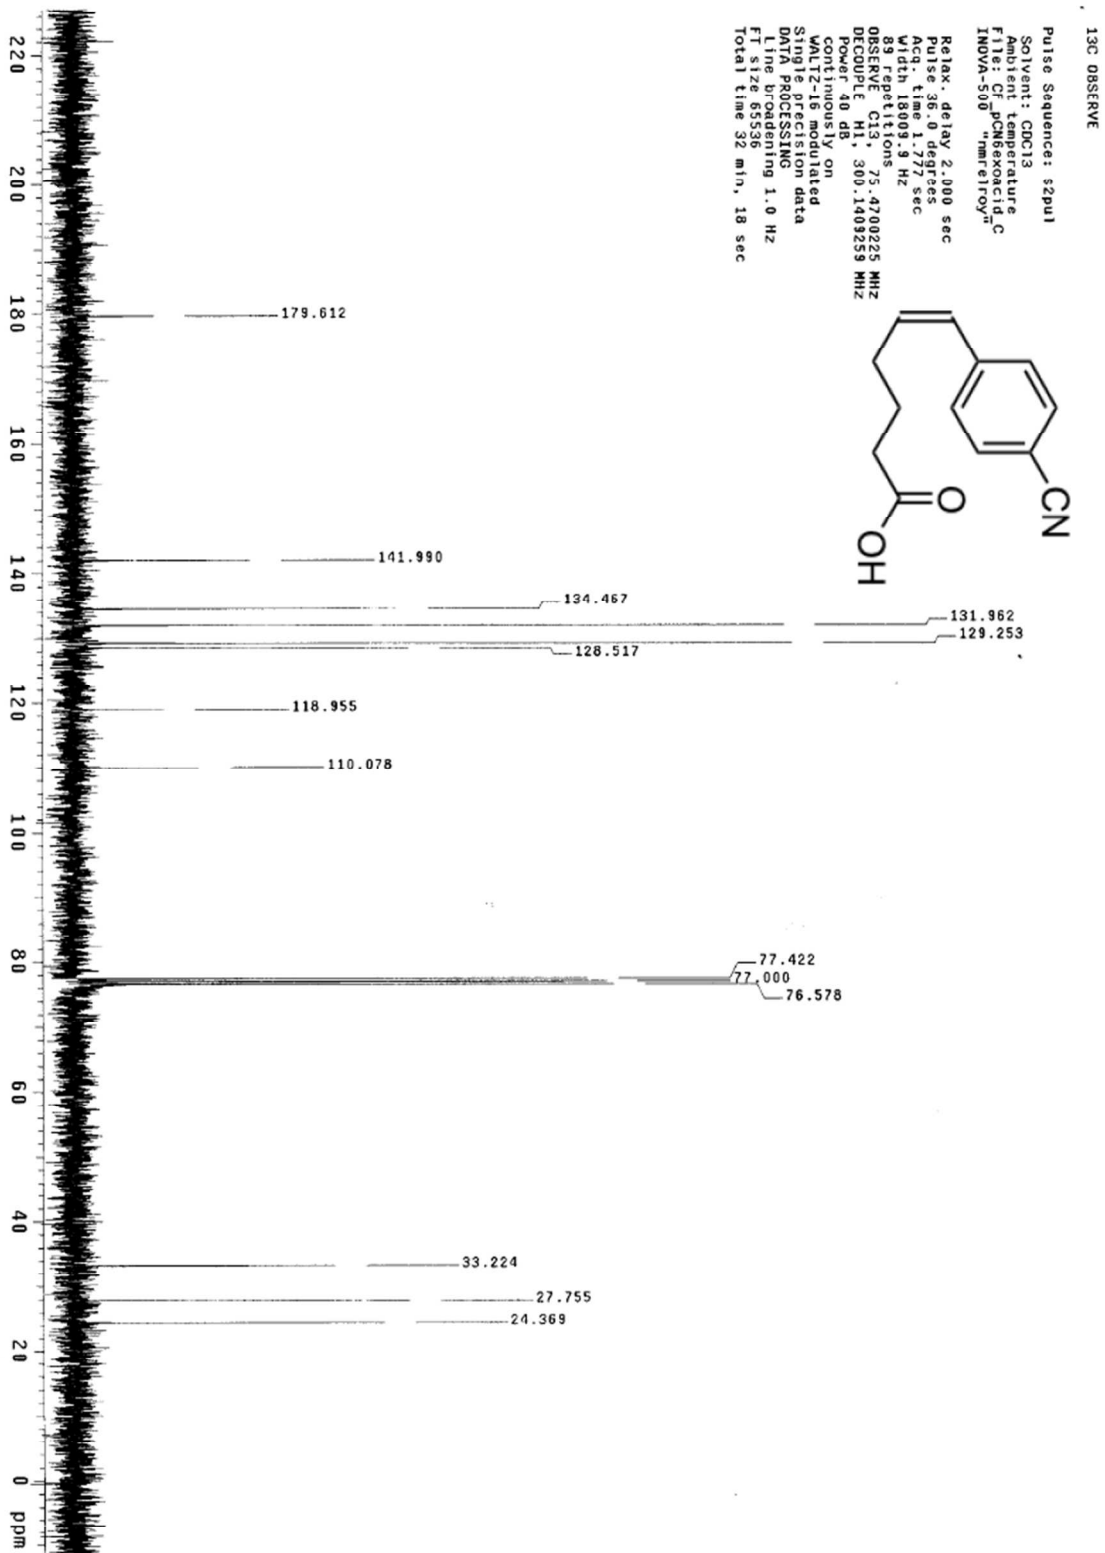

Figure S-6 <sup>13</sup>C NMR of Compound 7b

STANDARD 1H OBSERVE

Pulse Sequence: s2pu1  
Solvent: CDCl3  
Ambient temperature  
UNITYplus-300 "mm2"  
Relax. delay 1.000 sec  
Pulse 15.0 degrees  
Acq. time 3.813 sec  
Width 416.4 Hz  
Sensitivity 0.00.1380464 MHz  
OBSERVE  
DATA PROCESSING  
Line broadening 0.1 Hz  
FT size 32768  
Total time 1 min, 17 sec

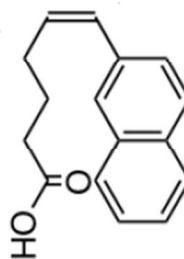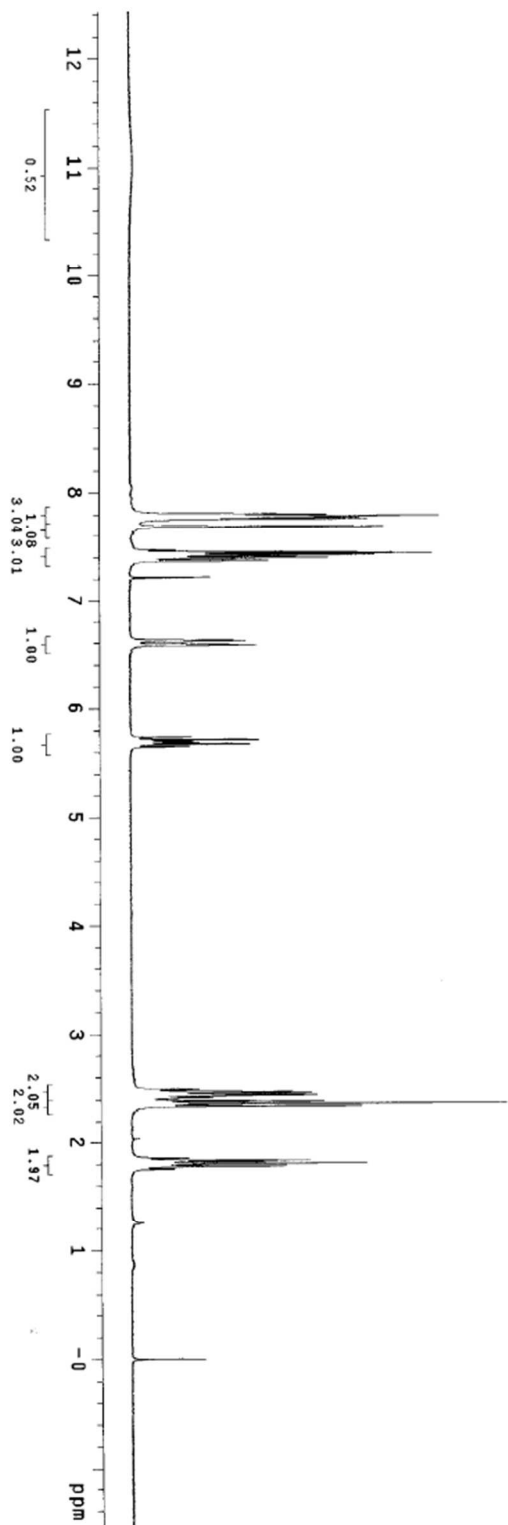

Figure S-7 <sup>1</sup>H NMR of Compound 7c

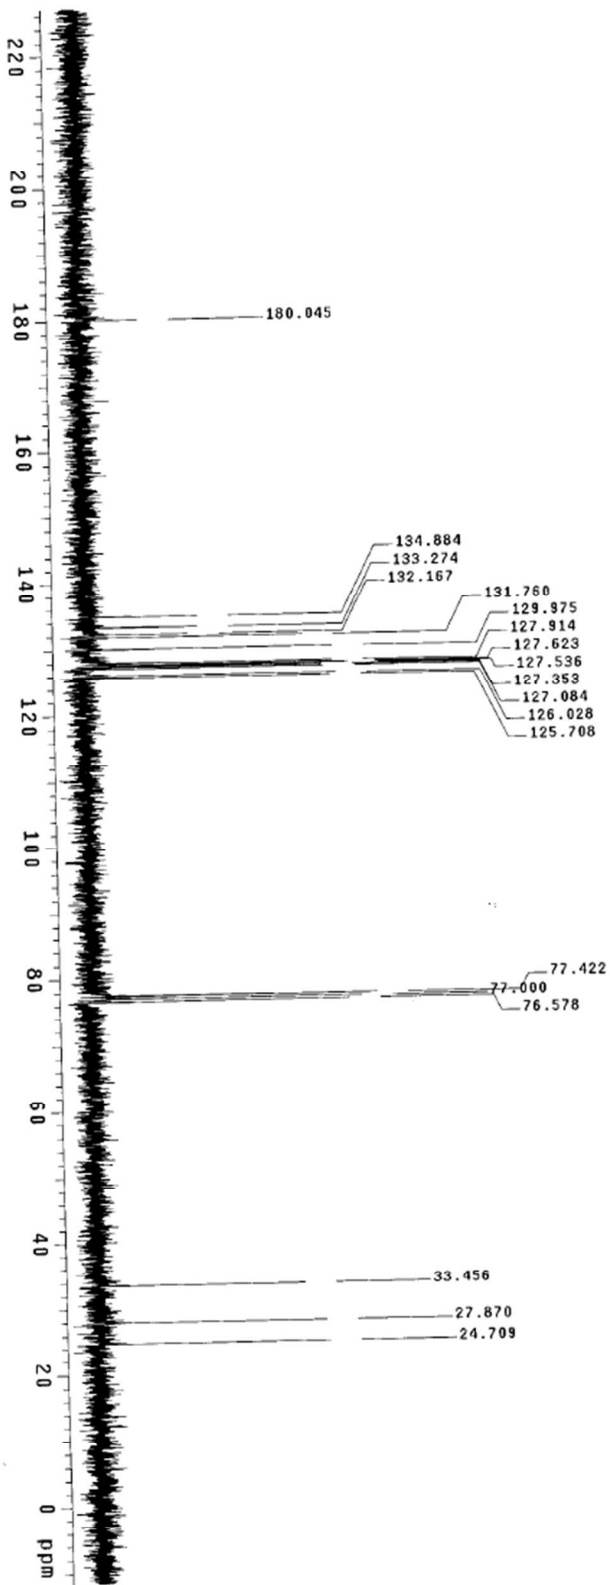

13C OBSERVE

Pulse Sequence: szpul  
 Solvent: CDCl3  
 Ambient temperature  
 UNITYplus-300 "nmr2"

Relax. delay 2.000 sec  
 Pulse 36.0 degrees  
 Acq. time 1.777 sec  
 Width 18009.9 Hz  
 32 repetitions  
 OBSERVE C13, 75.4700248 MHz  
 DECOUPLE H1, 300.1409253 MHz  
 Power 40 dB  
 continuously on  
 WALTZ-16 modulated  
 Single precision data  
 DATA PROCESSING  
 Line 04.65536  
 F1 2.165536  
 Total time 2 min, 1 sec

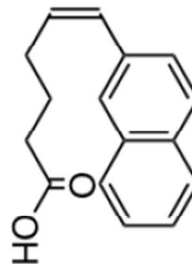

Figure S-8 <sup>13</sup>C NMR of Compound 7c

dp-5-065 (cis-*iPr*)

STANDARD 1H OBSERVE  
Pulse Sequence: s2pu1  
Solvent: CDCl3  
Ambient temperature:  
UNITYplus-300 mm/2"  
Relax. delay 1.000 sec  
Pulse 15.0 degrees  
Acq. time 3.813 sec  
Width 4196.4 Hz  
Repetitions 300.1390251 MHz  
OSKERPROCSSING  
Data Processing  
Time Broadening 0.1 Hz  
FI size 32768  
Total time 0 min, 38 sec

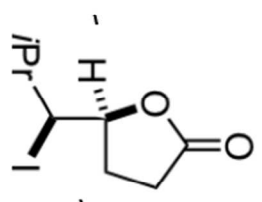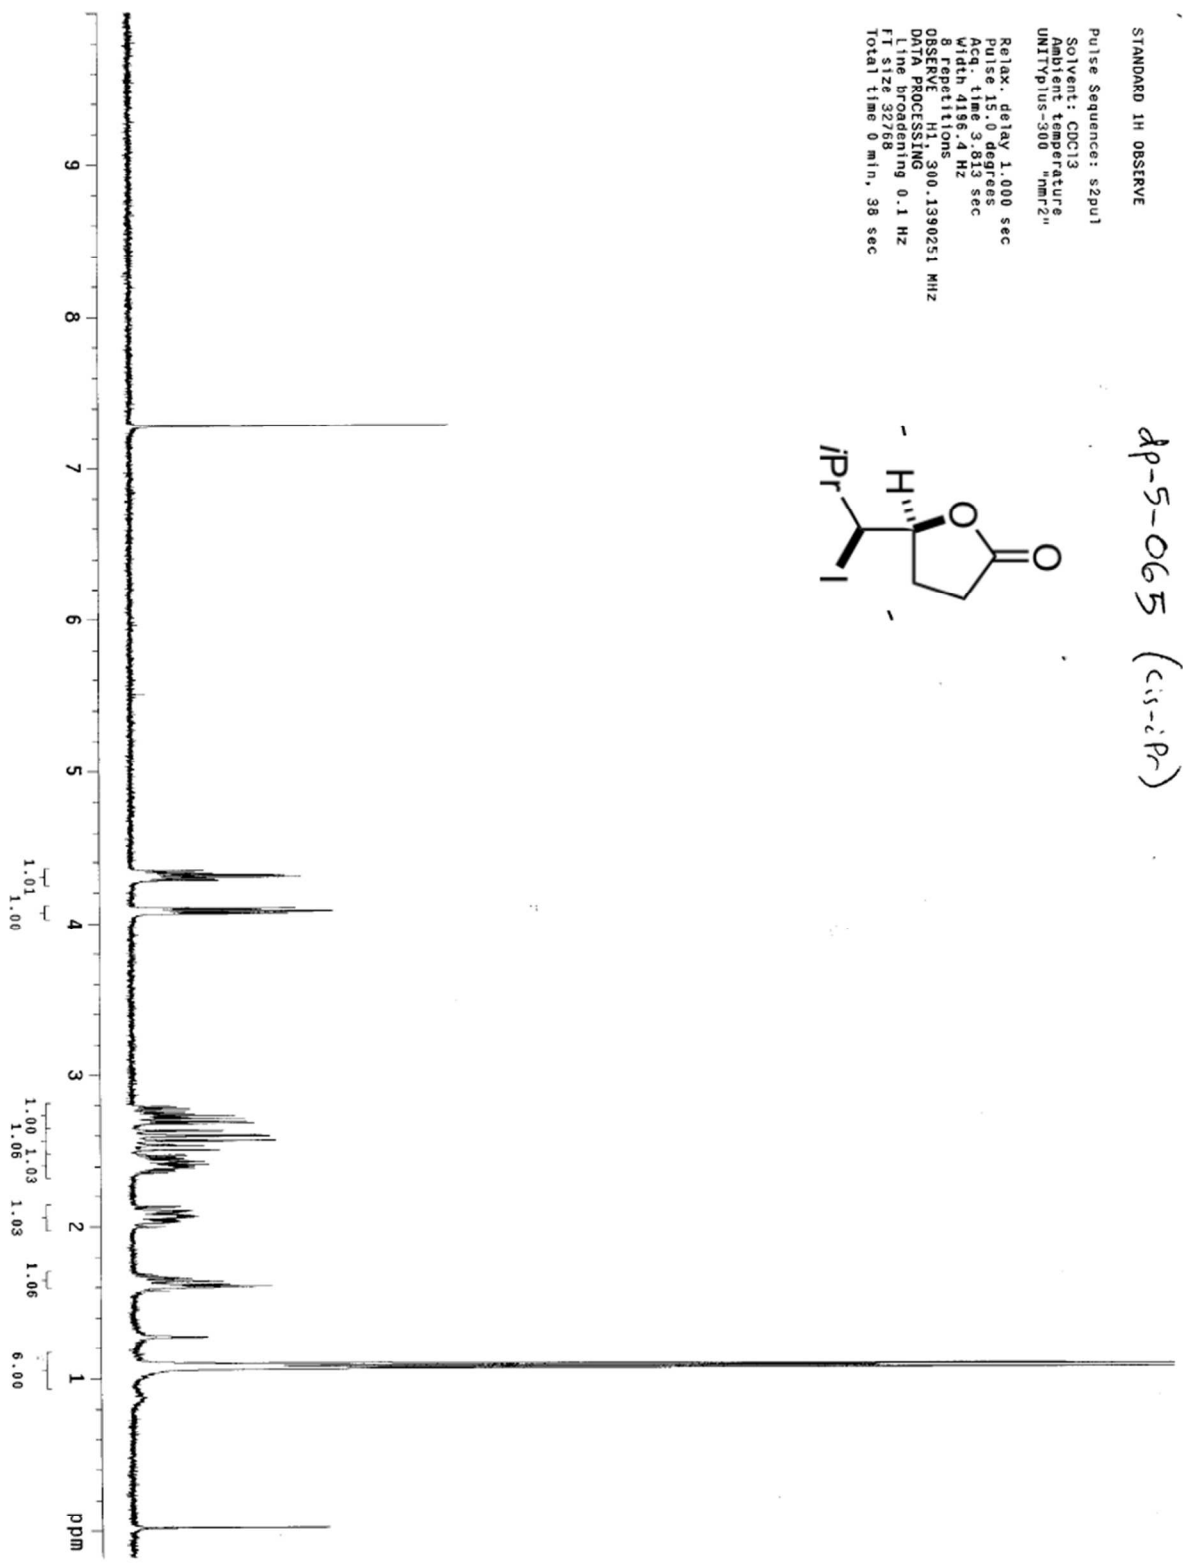

Figure S-9 <sup>1</sup>H NMR of Compound 6a

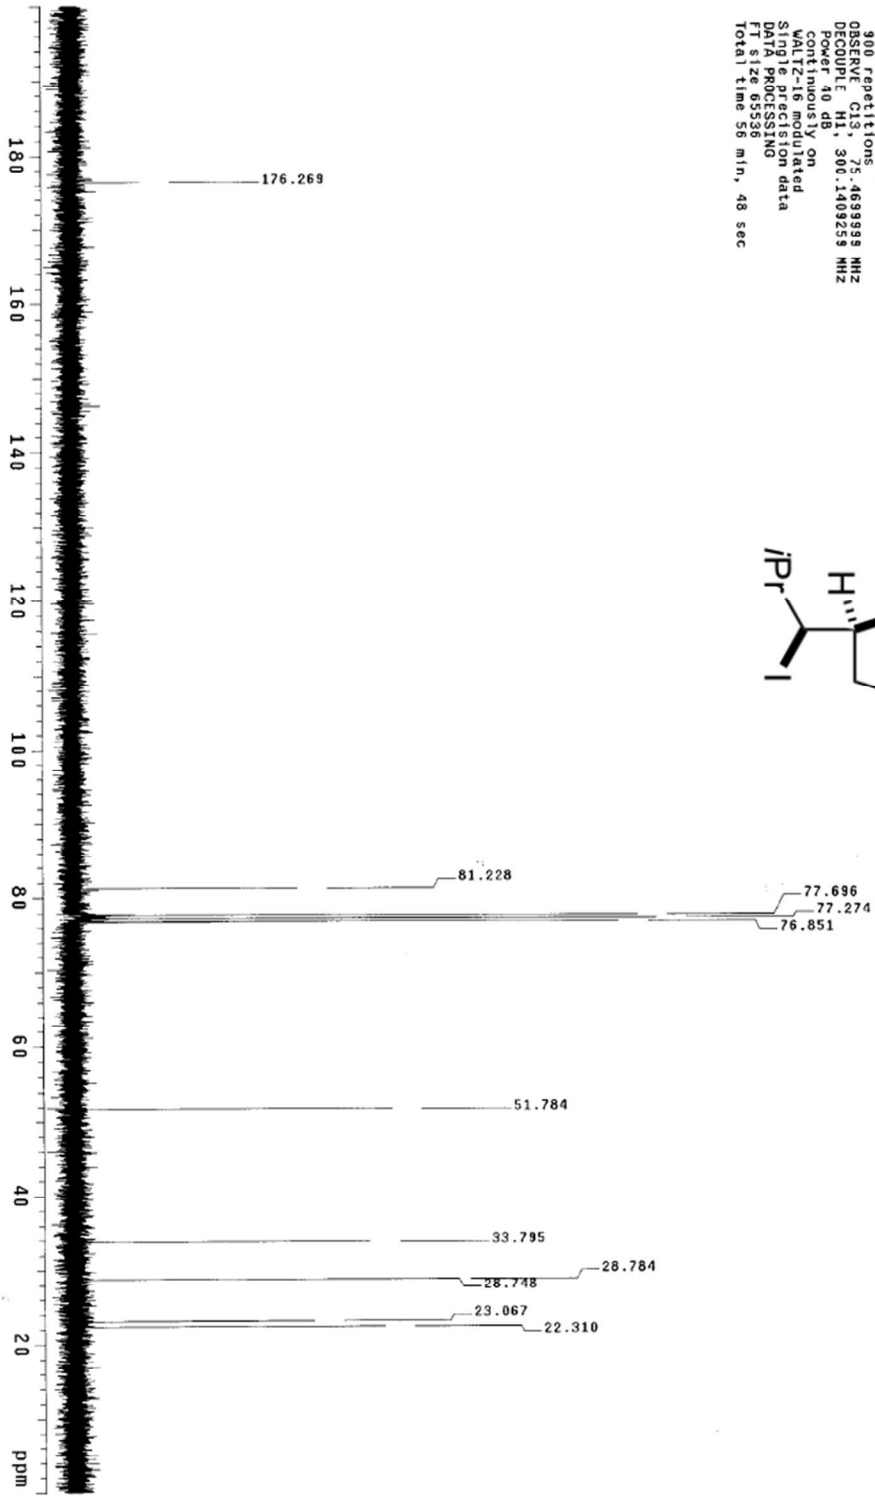

Figure S-10 <sup>13</sup>C NMR of Compound 6a

(cis-*i*Bu)

Archive directory:  
Sample directory:  
Pulse Sequence: s2pul1  
Solvent: cdcl3  
Ambient temperature  
File: 05\_DHP1073\_row7\_s2pul1\_H1  
INOVA-506 "marestroy"  
Relax. delay 2.000 sec  
Pulse 30.0 degrees  
Acq. time 4.000 sec  
Width 6410.9 Hz  
8 Repetitions  
OBSERVE H1 399.8047090 MHz  
DATA PROCESSING  
F1 size 65536  
Total time 1 min, 0 sec

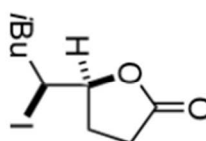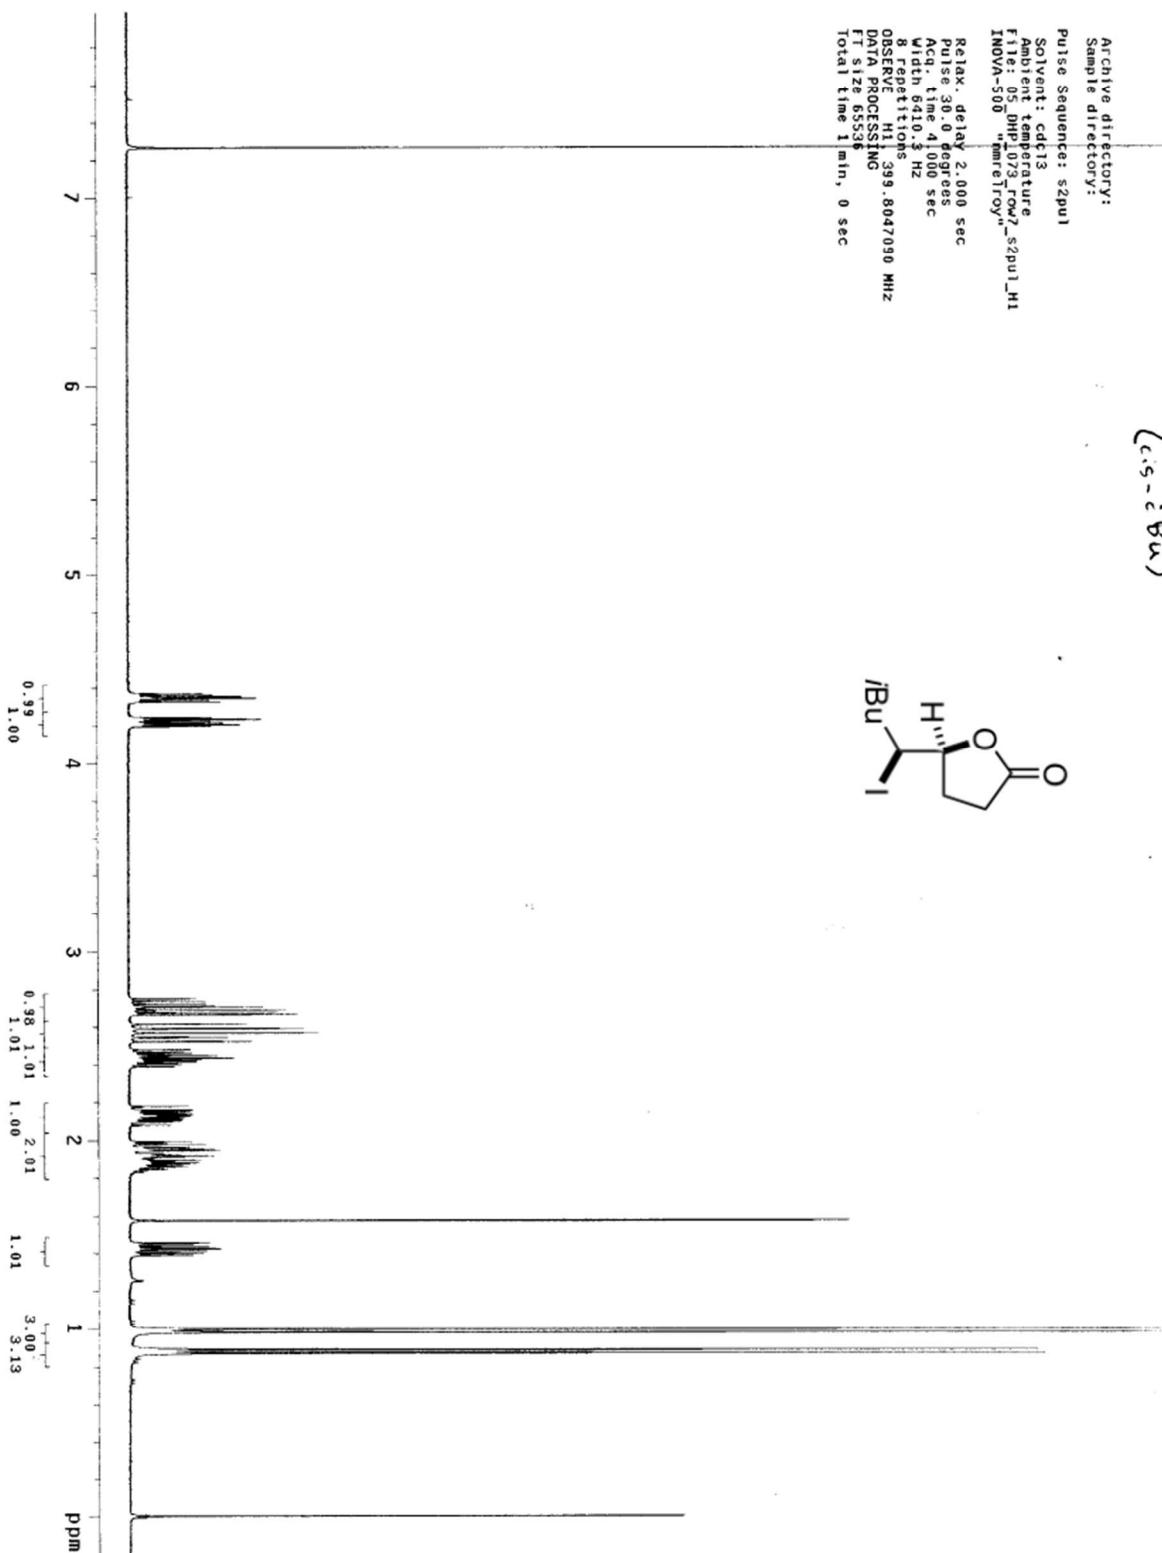

Figure S-11 <sup>1</sup>H NMR of Compound 6b

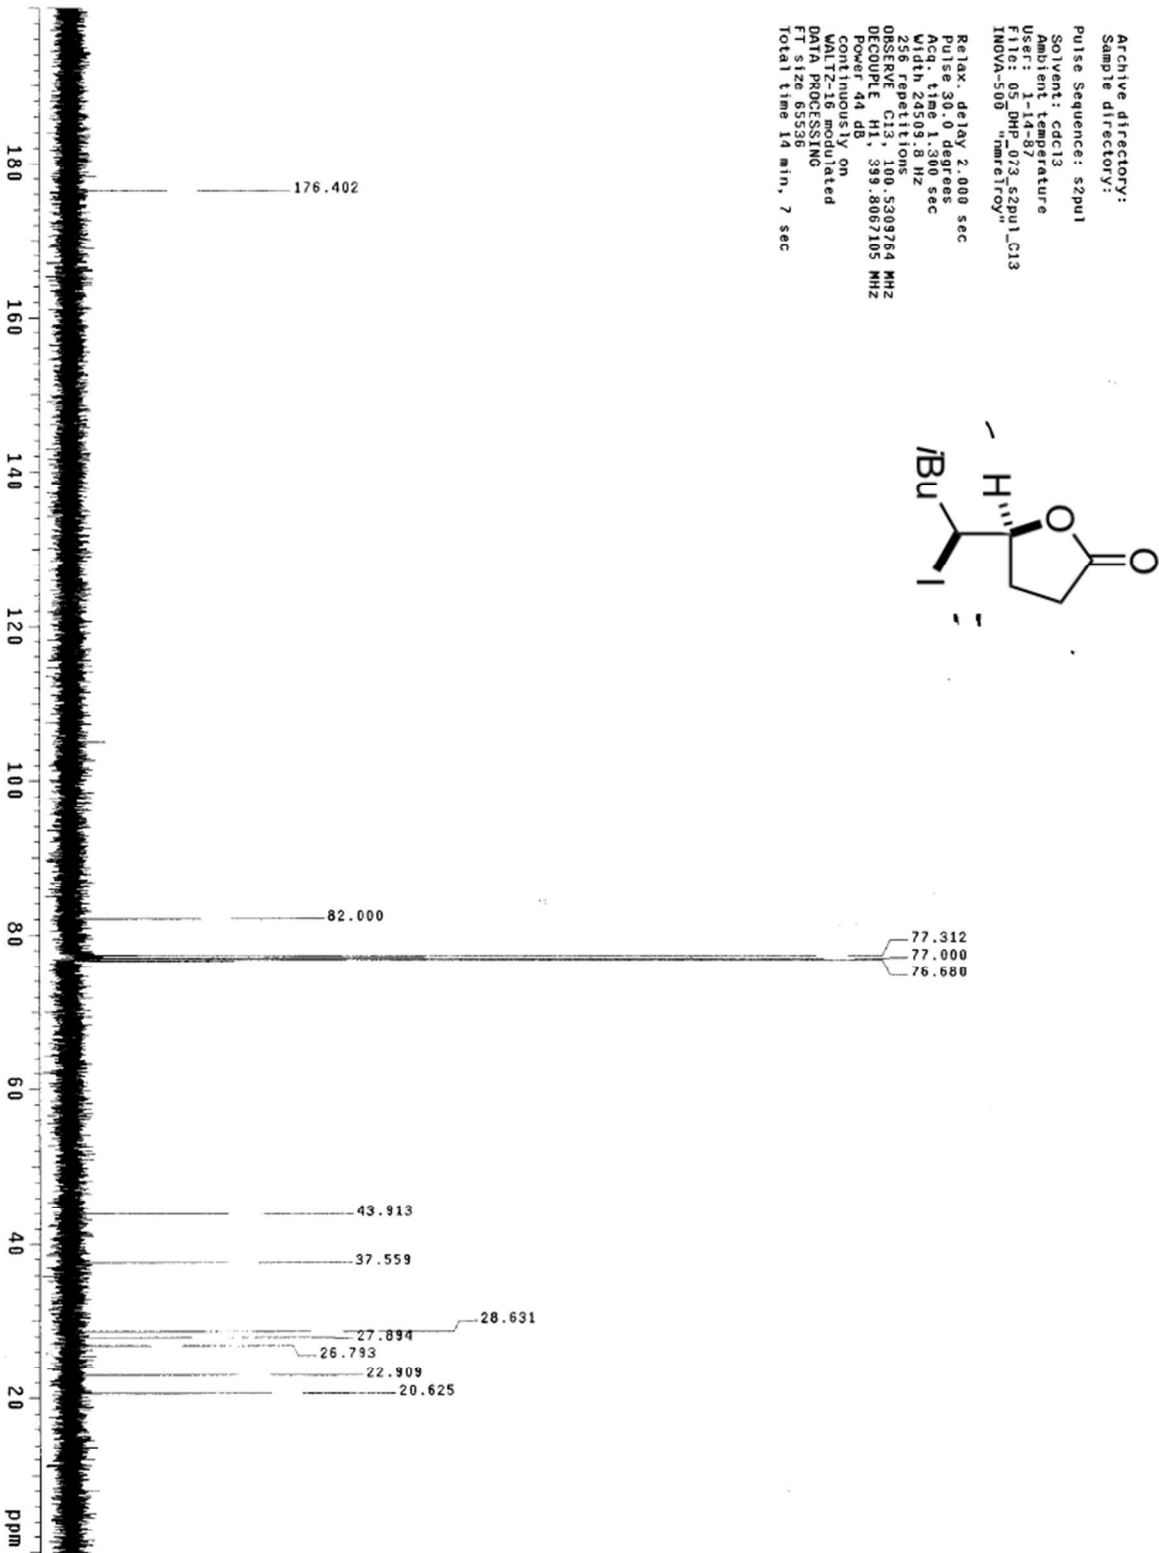

Figure S-12 <sup>13</sup>C NMR of Compound 6b

STANDARD 1H OBSERVE

Pulse Sequence: s2pul  
 Solvent: CDCl3  
 Ambient temperature  
 UNIT: Plus-300 "nmr2"

Relax. delay 1.000 sec  
 Pulse 15.0 degrees  
 Acq. time 3.813 sec  
 Width 4156.4 Hz  
 16 repetitions

OBSERVE: F1300.1390300 MHz  
 DATA PROCESSING  
 File name: 32768  
 FI size: 32768  
 Total time 1 min, 17 sec

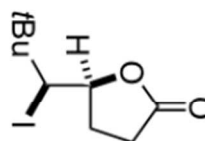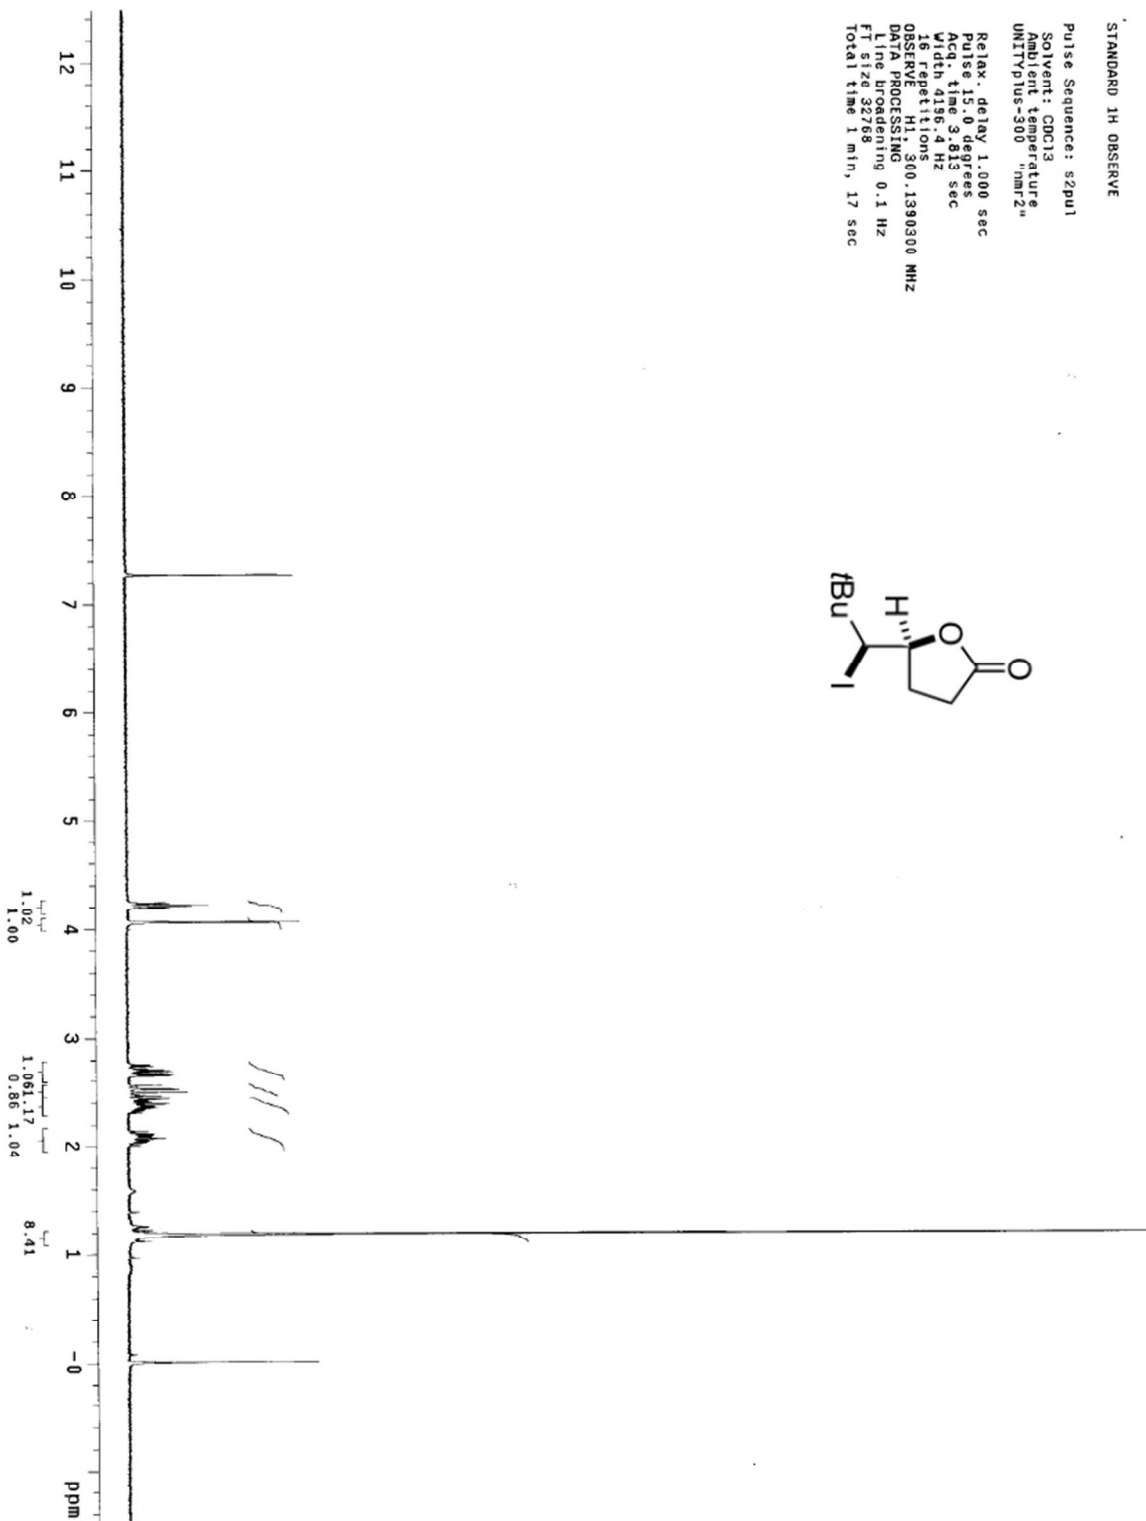

Figure S-13 <sup>1</sup>H NMR of Compound 6c



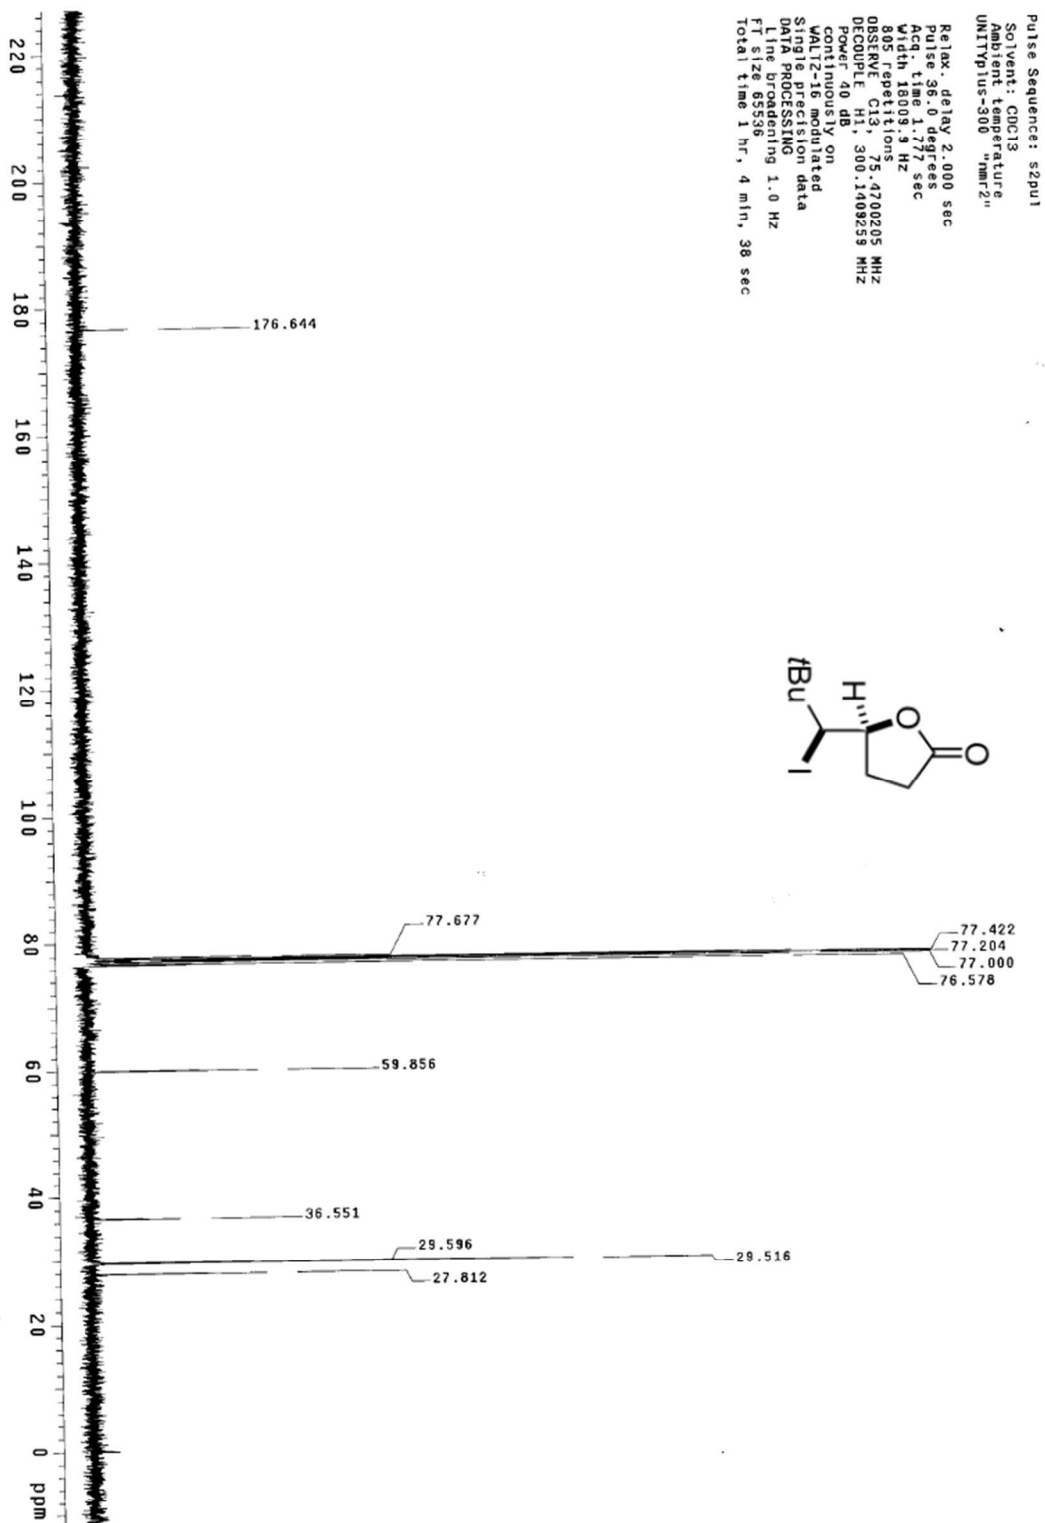

Figure S-14 <sup>13</sup>C NMR of Compound 6c

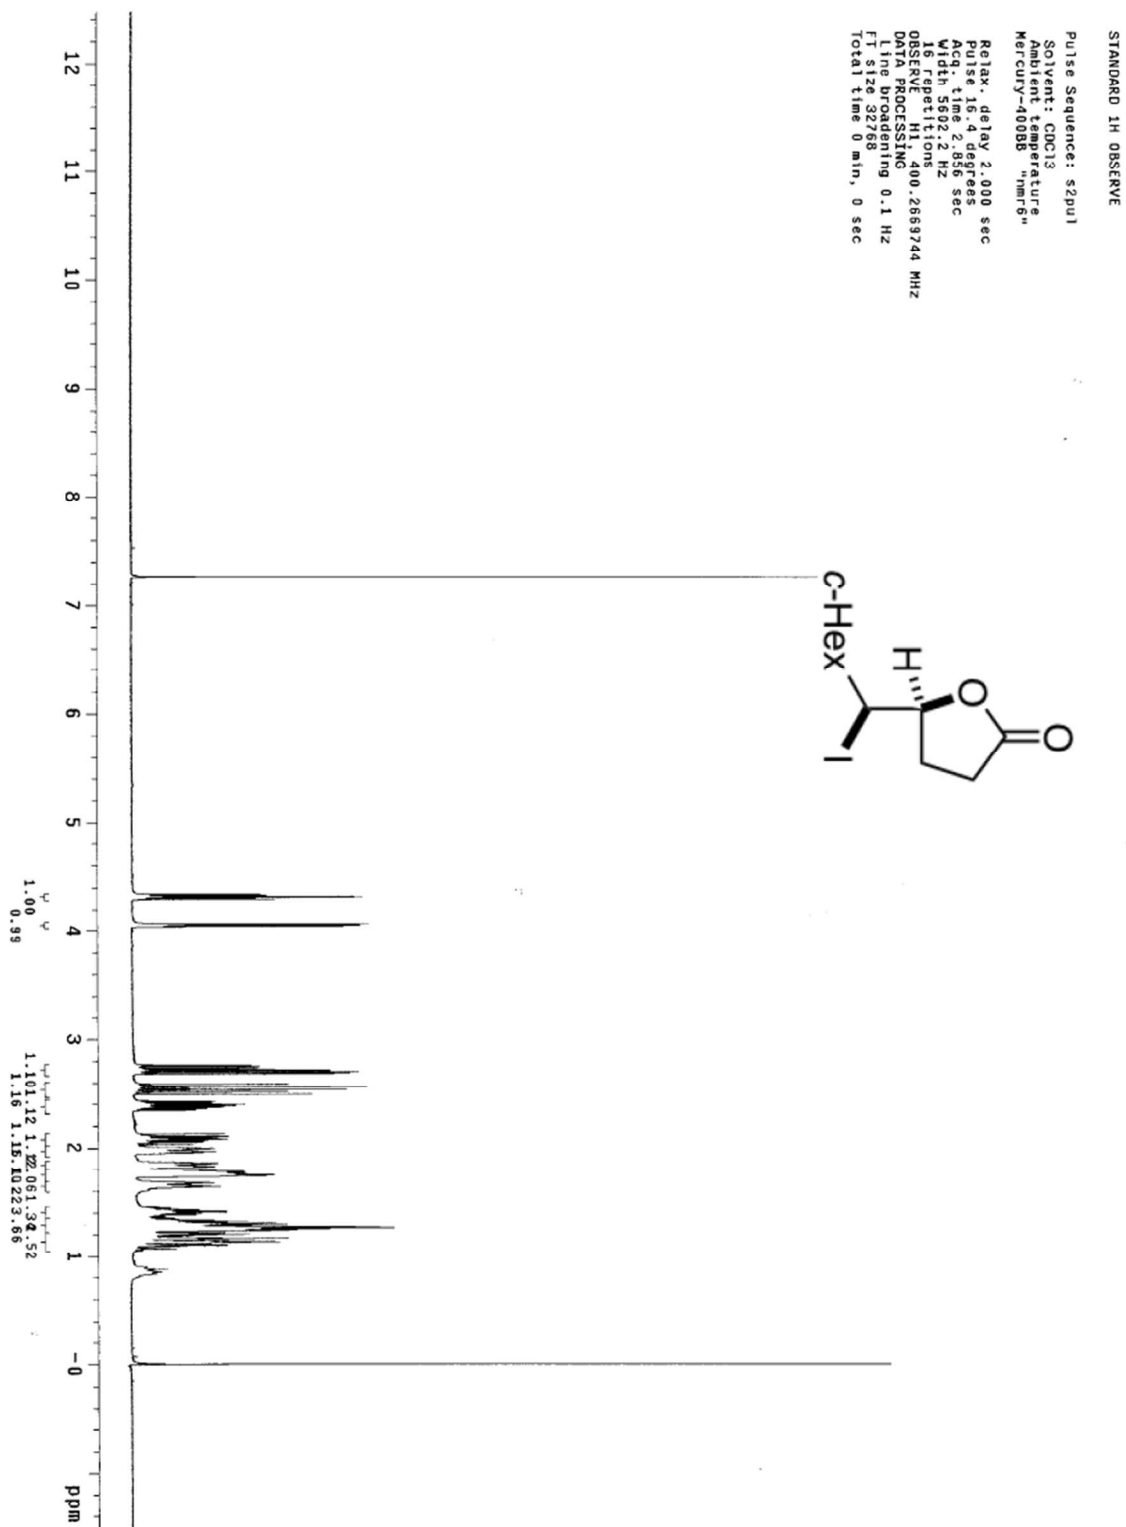

Figure S-15 <sup>1</sup>H NMR of Compound 6d



STANDARD 1H OBSERVE

Pulse Sequence: szpu1  
 Solvent: CDCl3  
 Ambient temperature  
 UNITYplus-300 "nmr2"

Relax. delay 1.000 sec  
 Pulse 15.0 degrees  
 Acq. time 3.613 sec  
 Width 4196.4 Hz  
 IS repetitions  
 OBSERVE H1: 300.1390311 MHz  
 DR1A PROCESSING 0.1 Hz  
 FI size 32758  
 Total time 1 min, 17 sec

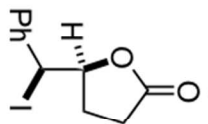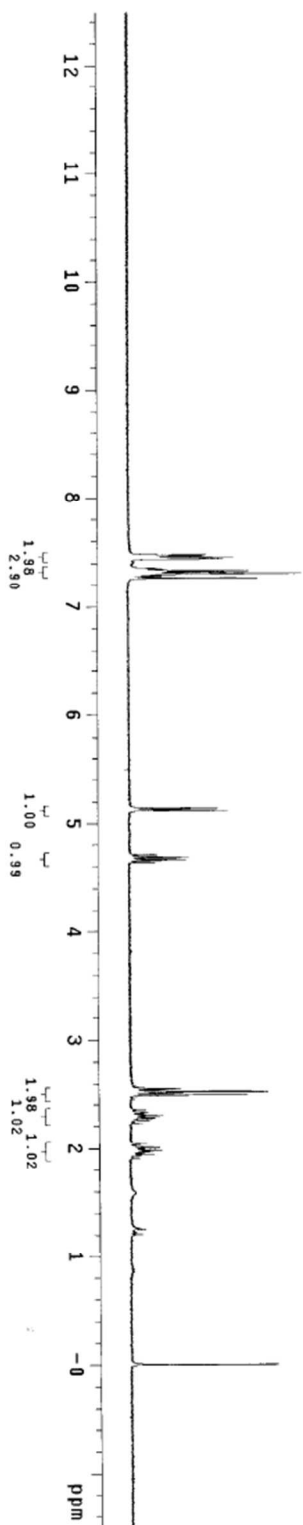

Figure S-17 <sup>1</sup>H NMR of Compound 6c

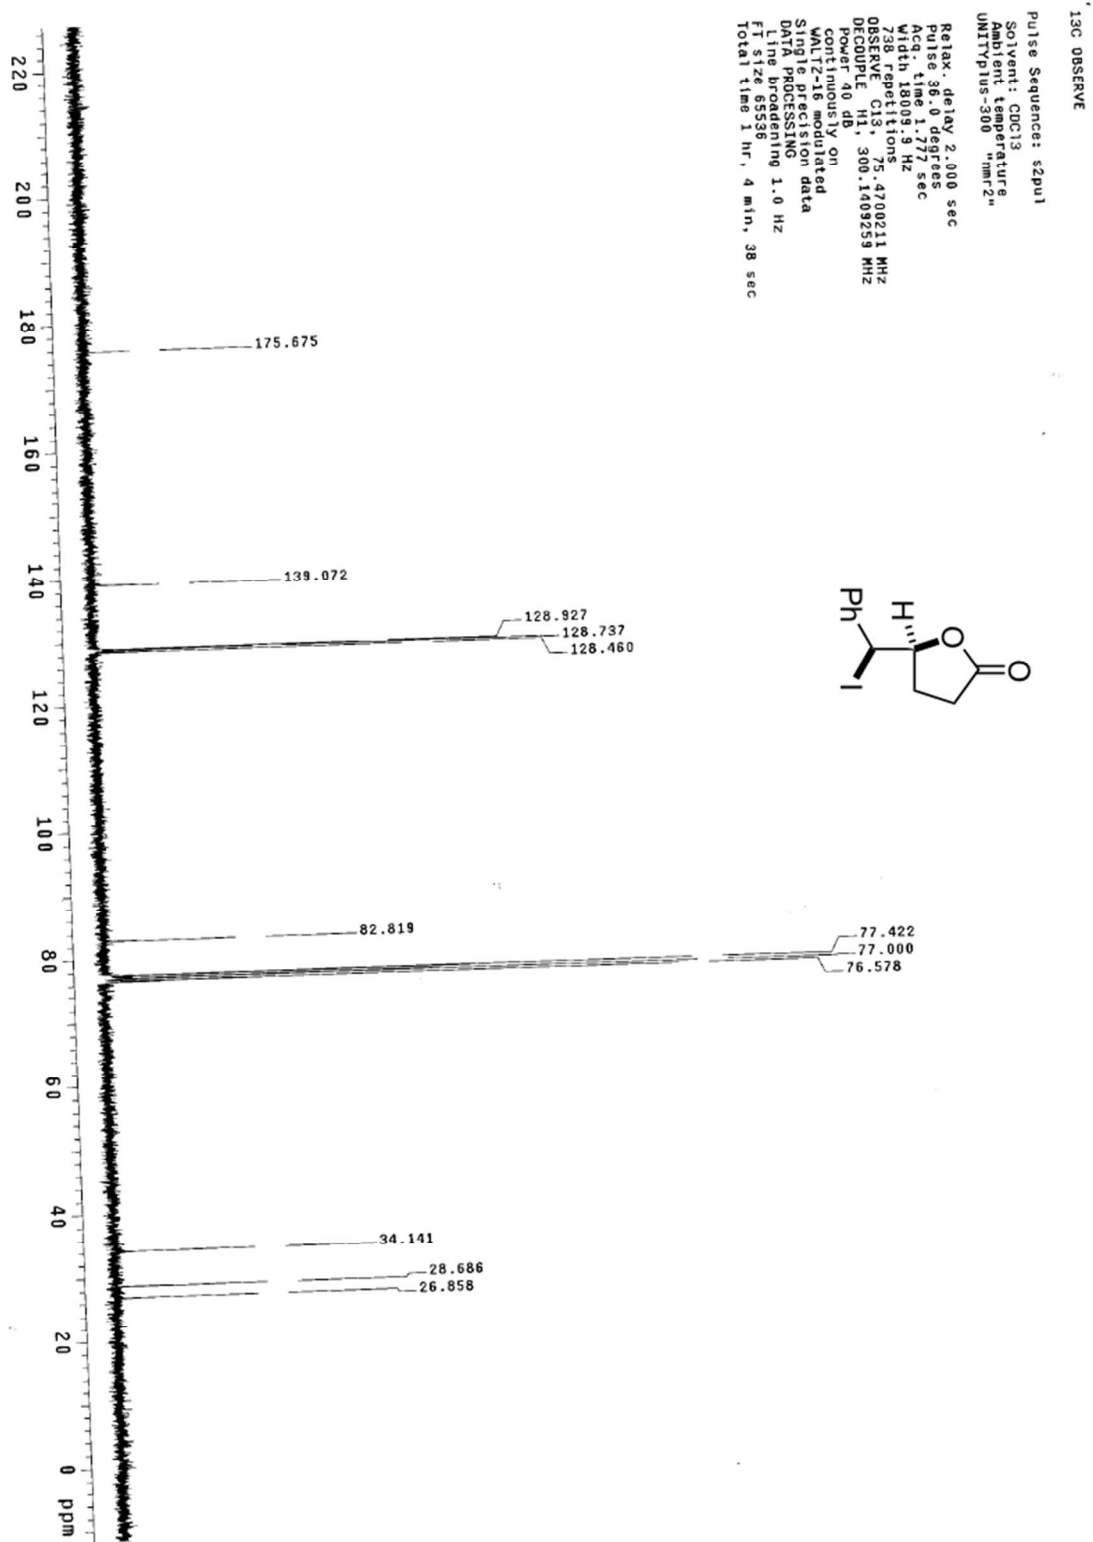

Figure S-18 <sup>13</sup>C NMR of Compound 6c

STANDARD 1H OBSERVE

Pulse Sequence: s2pul  
 Solvent: CDCl3  
 Ambient temperature  
 Mercury-40088 "mm-6"

Relax. delay 2.000 sec  
 Pulse 16.4 degrees  
 Acq. time 2.856 sec  
 Width 5602.2 Hz  
 16 repetitions  
 OBSERVE HI, 400.2689744 MHz  
 DATA PROCESSING  
 Line broadening 0.1 Hz  
 F1 size 32736  
 Total time 1 min, 20 sec

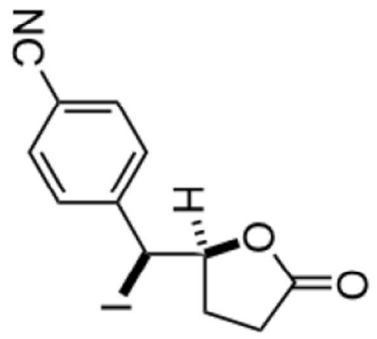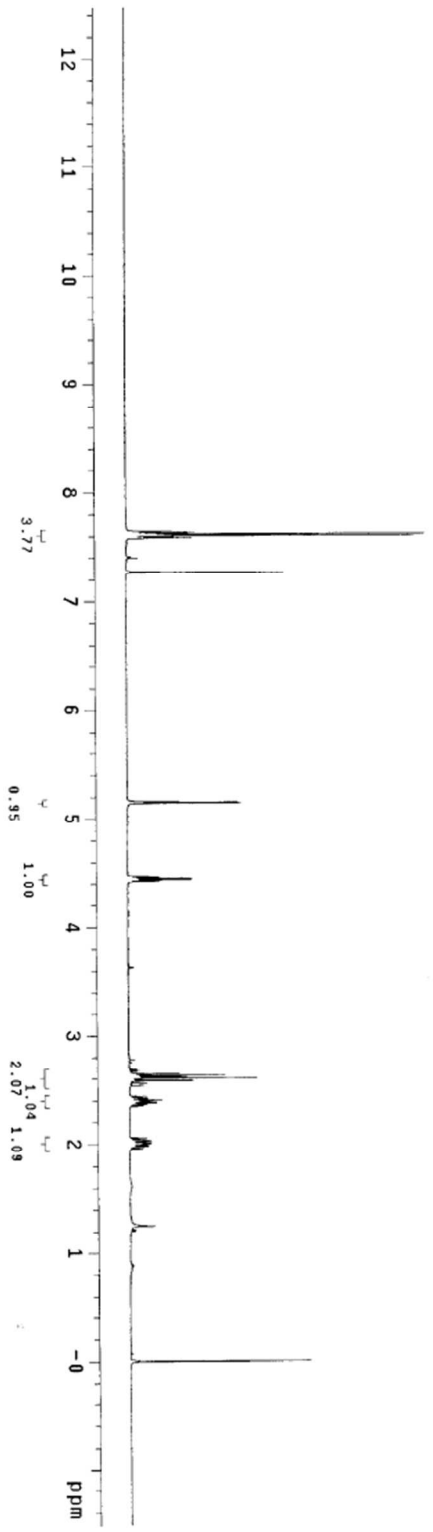

Figure S-19 <sup>1</sup>H NMR of Compound 6f

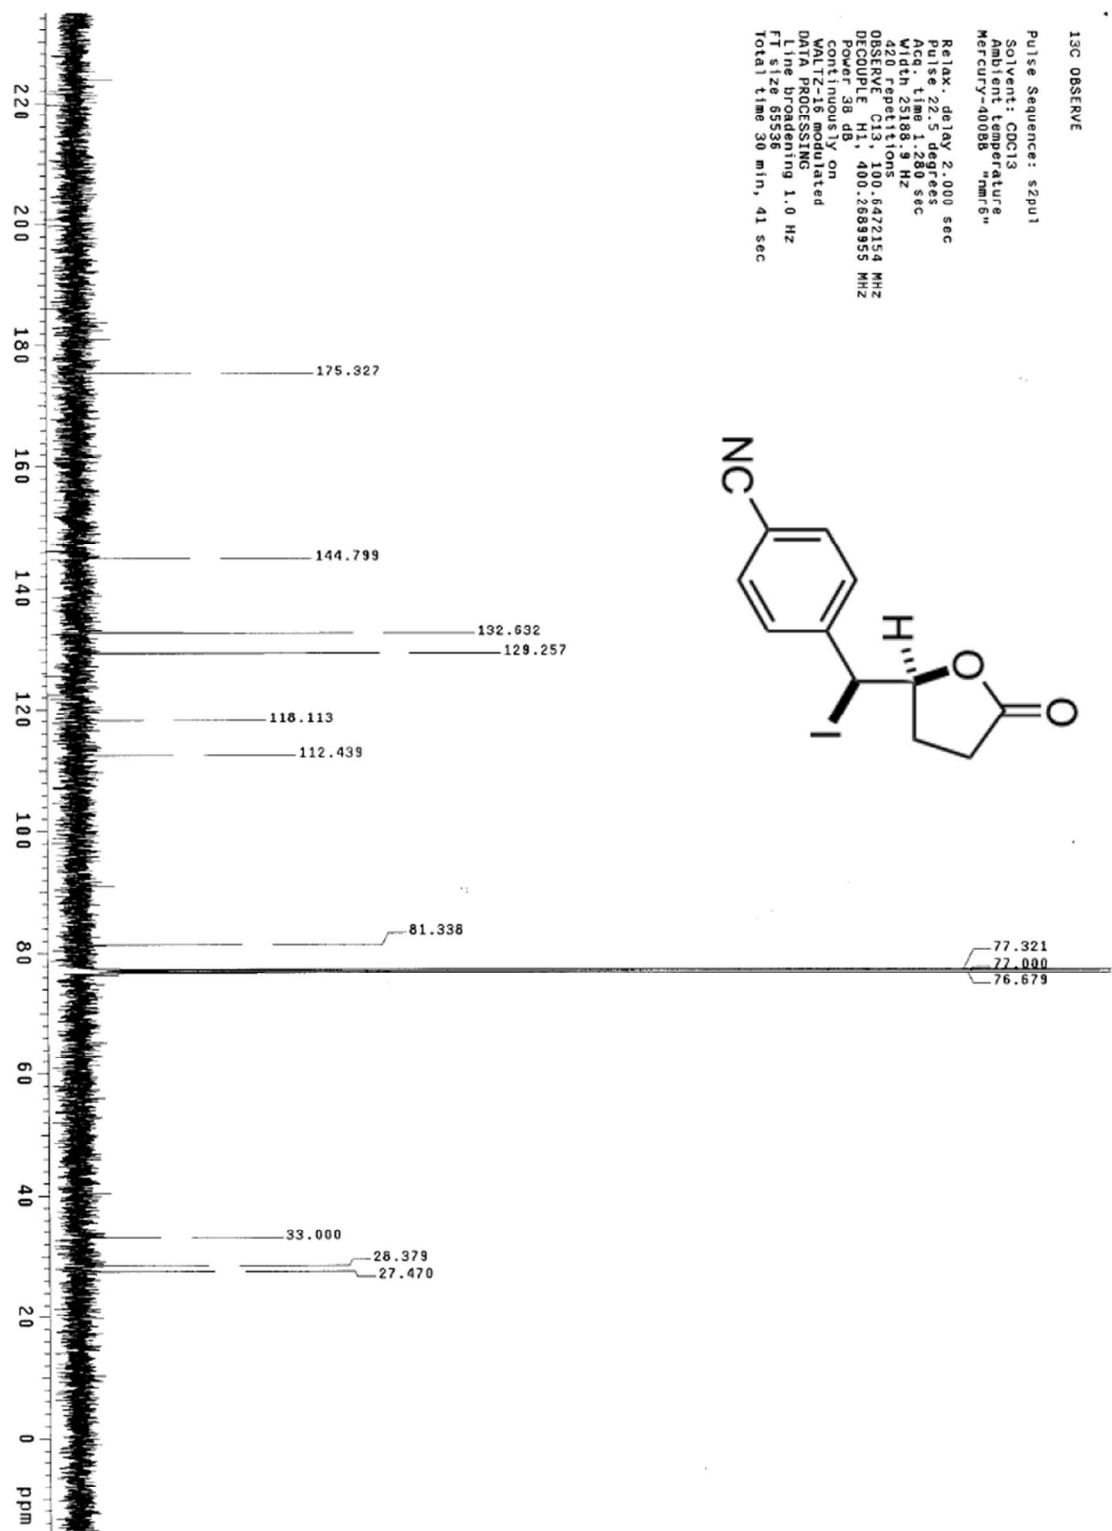

Figure S-20 <sup>13</sup>C NMR of Compound 6f

STANDARD 1H OBSERVE

Pulse Sequence: s2pul  
 Solvent: CDCl3  
 Ambient Temperature  
 Mercury-40088 "hmr6"

Relax. delay 2.000 sec  
 Pulse 16.4 degrees  
 Acq. time 2.856 sec  
 Width 5602.4 Hz  
 16 repetitions  
 OBSERVE: H1 400.2683757 MHz  
 DATA PROCESSING 0.1 Hz  
 FI size 32768  
 Total time 0 min, 0 sec

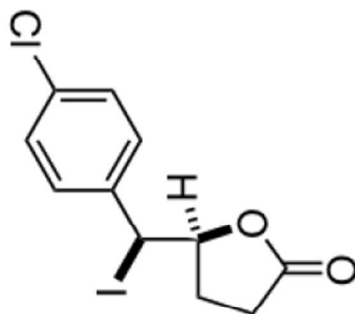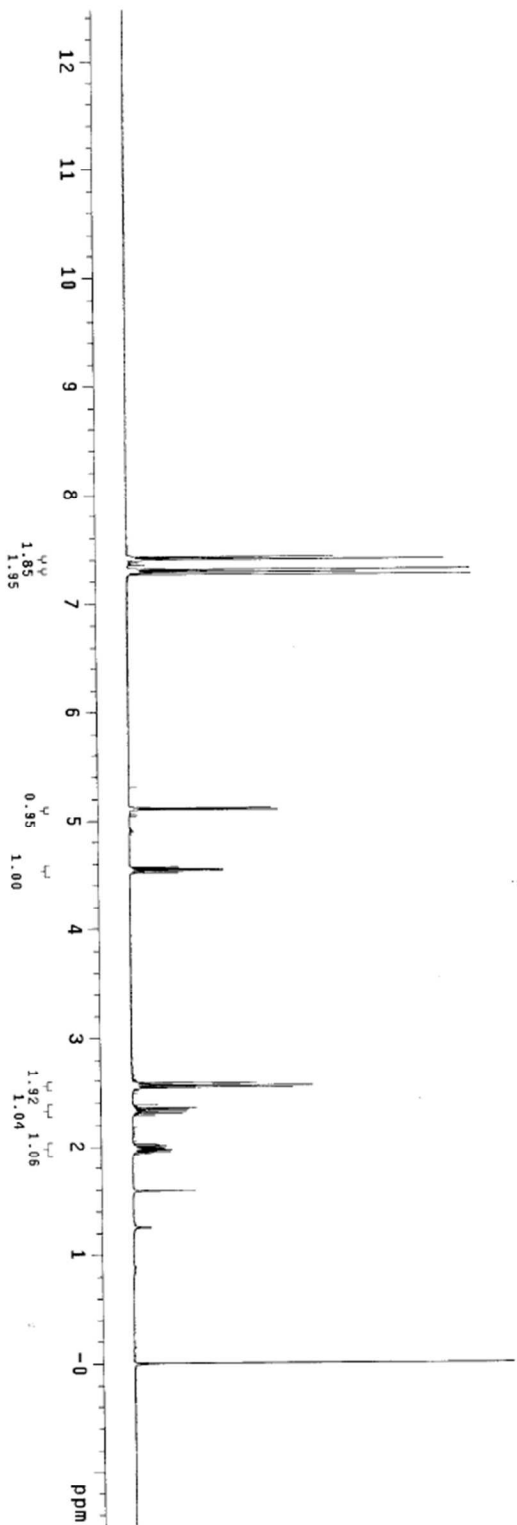

Figure S-21 <sup>1</sup>H NMR of Compound 6g



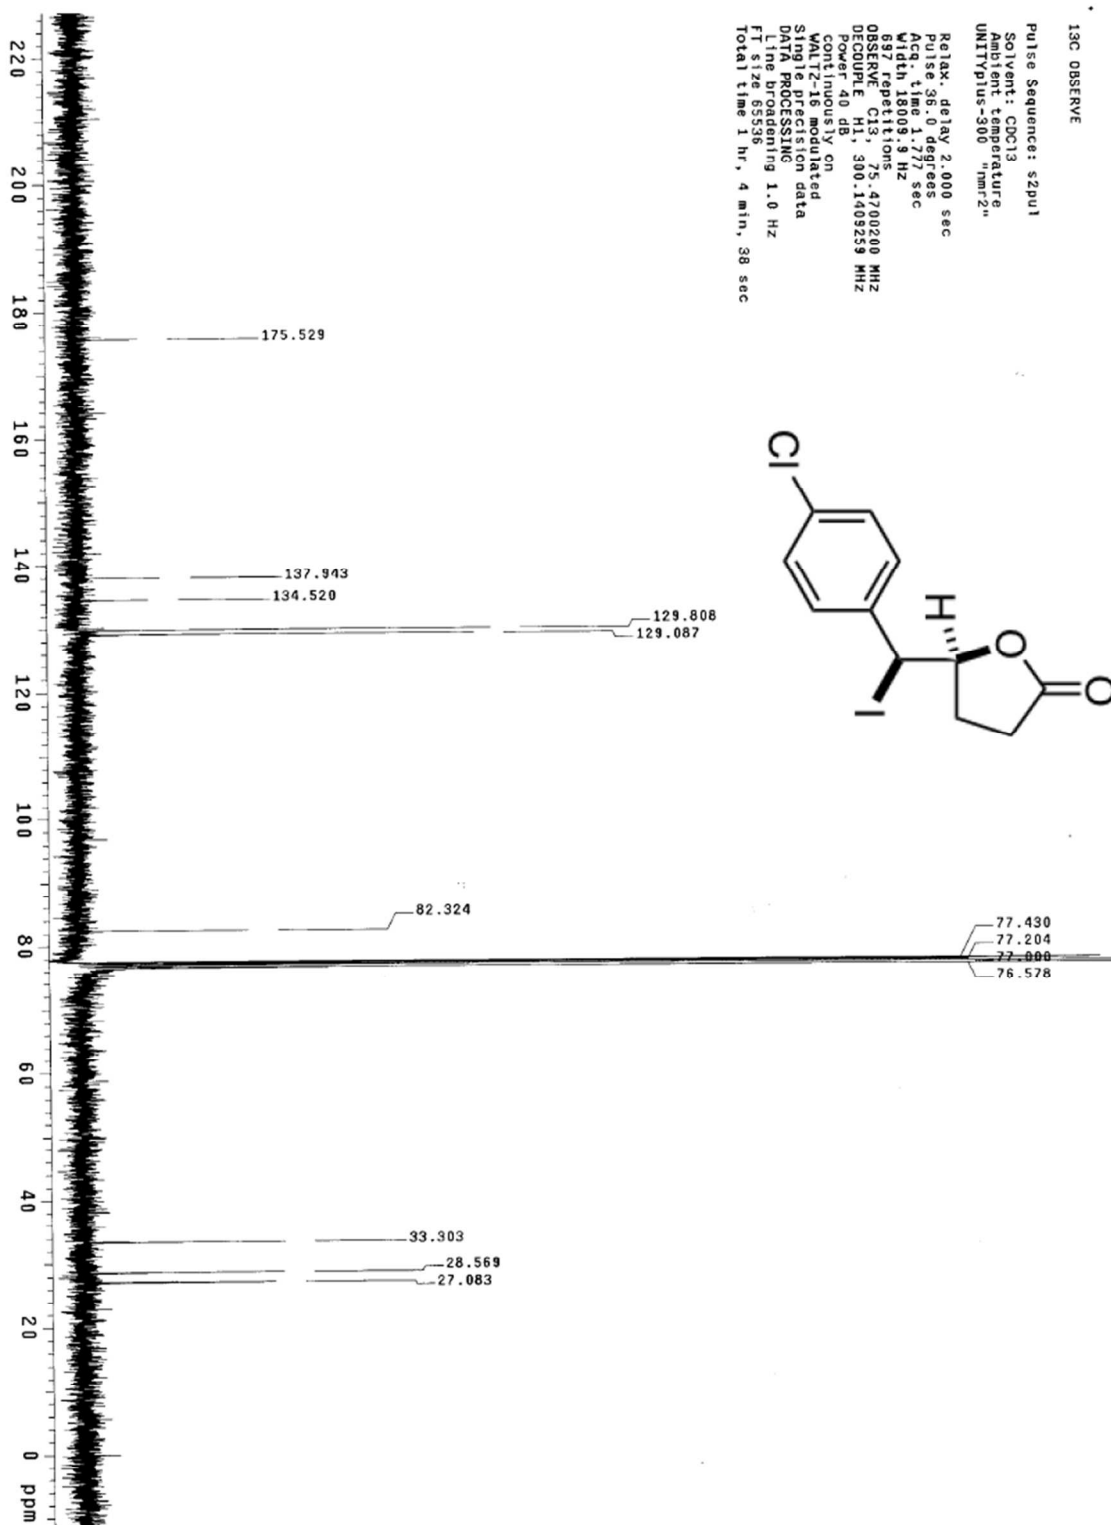

Figure S-22 <sup>13</sup>C NMR of Compound 6g

STANDARD 1H OBSERVE

Pulse Sequence: s2pu1  
Solvent: CDCl3  
Ambient temperature  
Mercury-400B8 "nmr5"  
Relax. delay 2.000 sec  
Pulse 16.4 degrees  
Acq. time 2.856 sec  
Width 5692.2 Hz  
16 repetitions  
0858K PROCESSING  
Data processing 0.1 Hz  
FT size 32768  
Total time 1 min, 20 sec

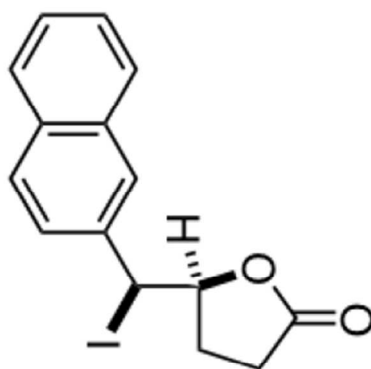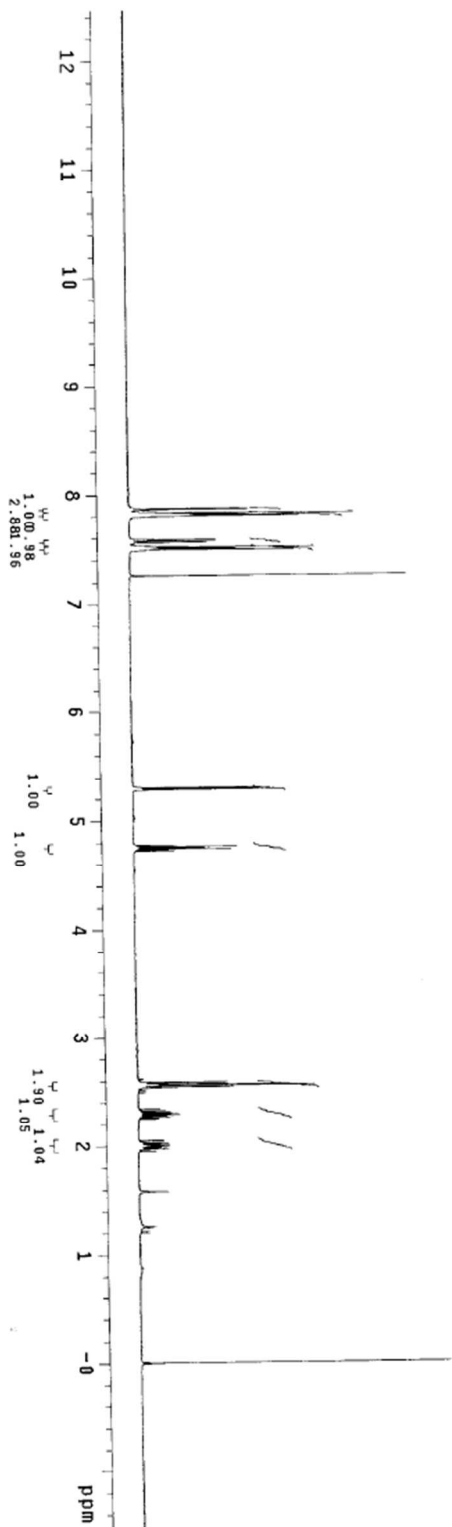

Figure S-23 <sup>1</sup>H NMR of Compound 6h

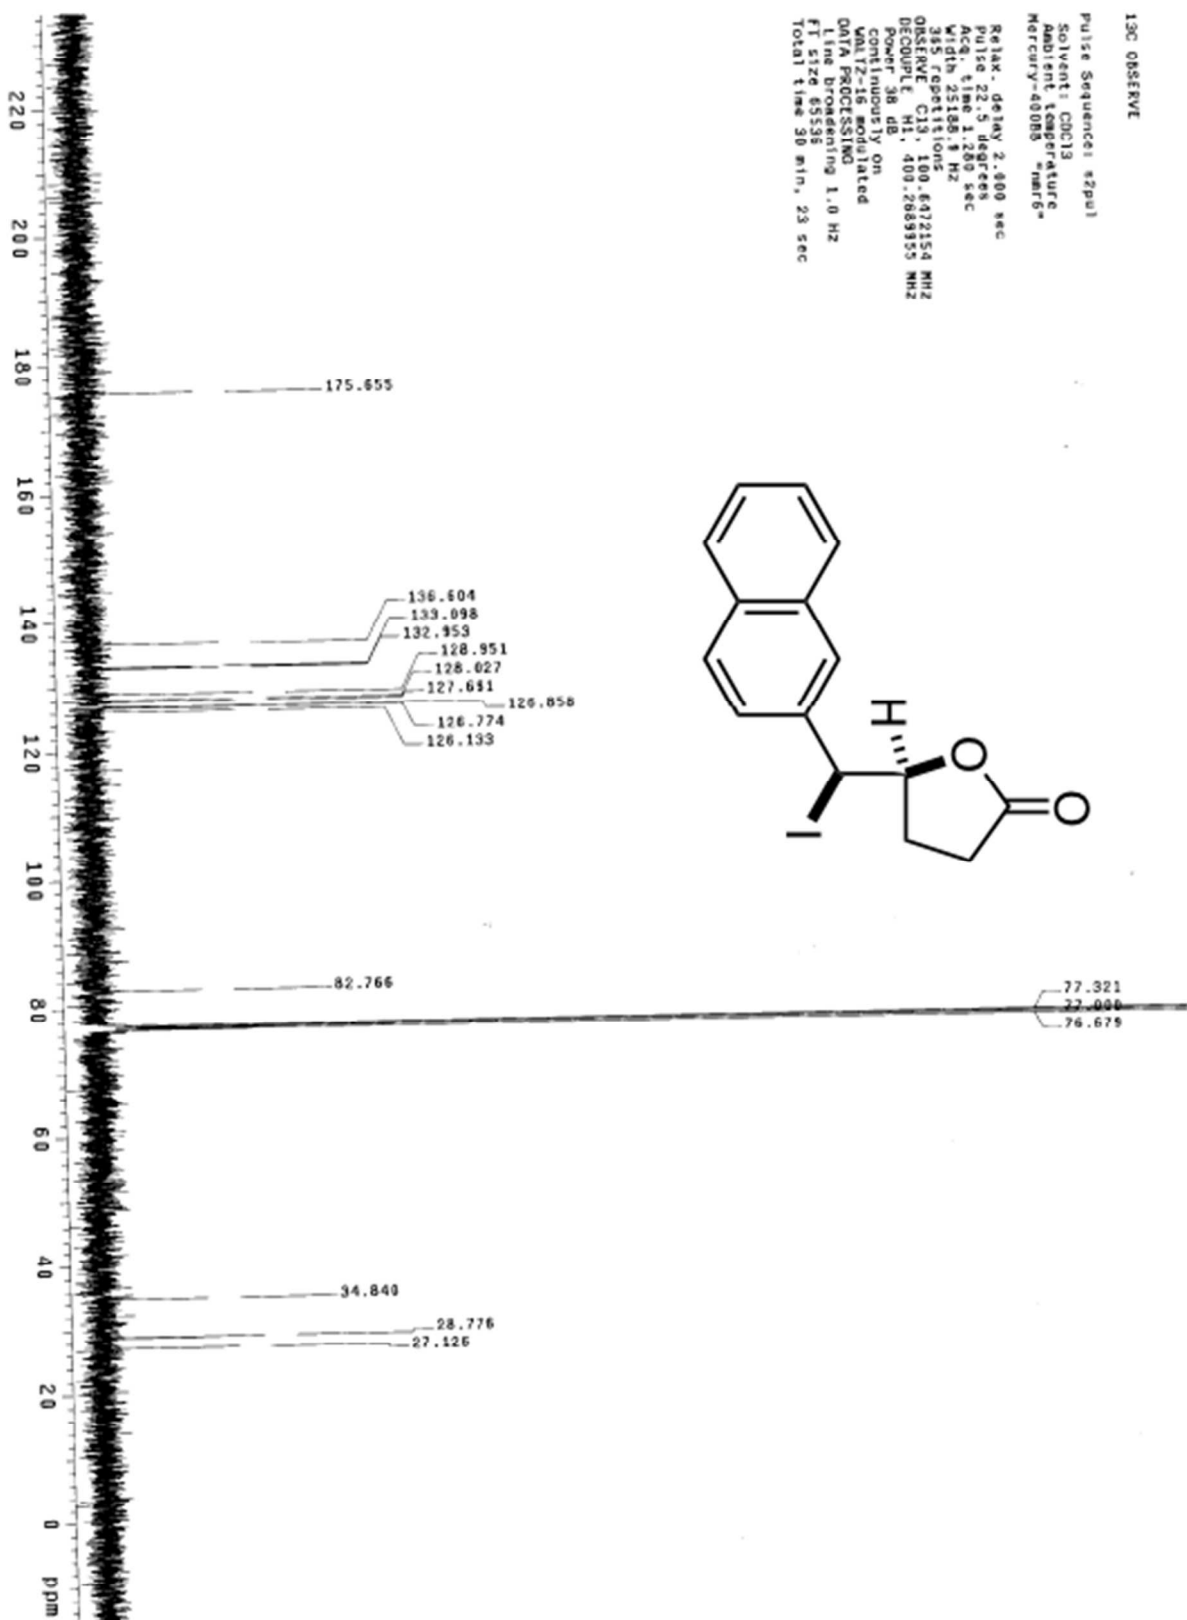

Figure S-24 <sup>13</sup>C NMR of Compound 6h

STANDARD 1H OBSERVE

Pulse Sequence: s2pul  
Solvent: CDCl3  
Ambient temperature  
UNITYplus-300 "nmr2"

Relax. delay 1.000 sec  
Pulse 15.0 degrees  
Acq. time 3.315 sec  
Width 416.1 Hz  
Observed H1 300.1390308 MHz  
DATE PROCESSED  
Line broadening 0.1 Hz  
FT size 32768  
Total time 1 min, 17 sec

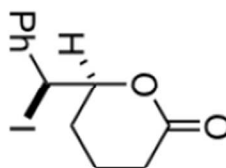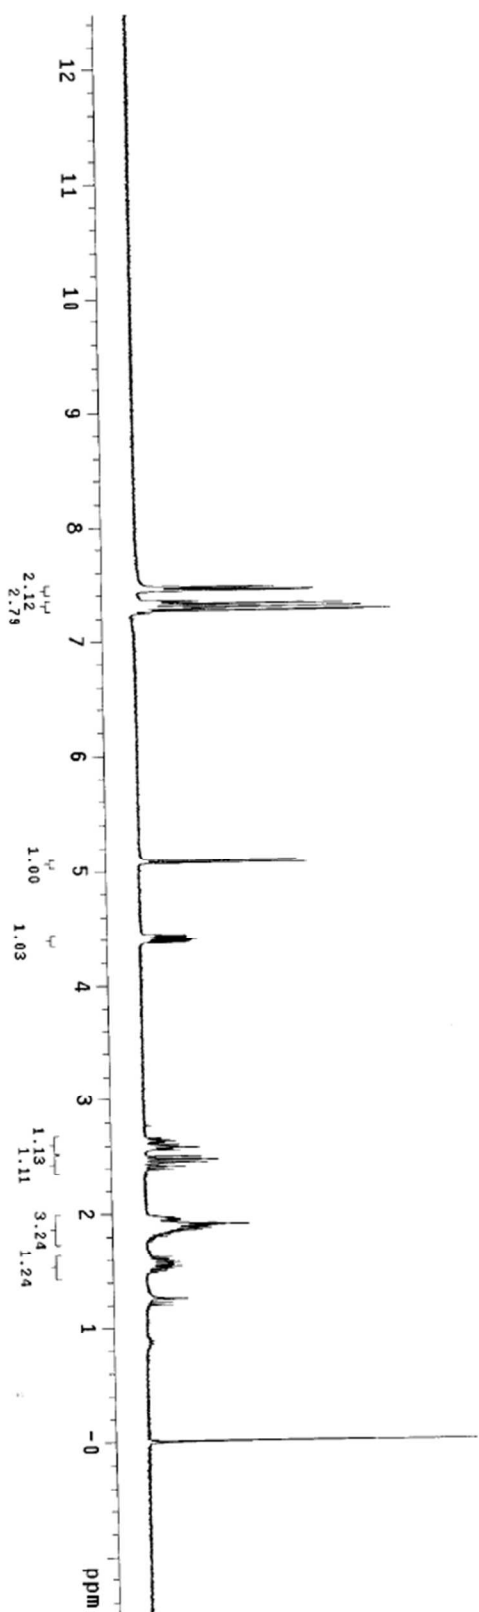

Figure S-25 <sup>1</sup>H NMR of Compound 8a

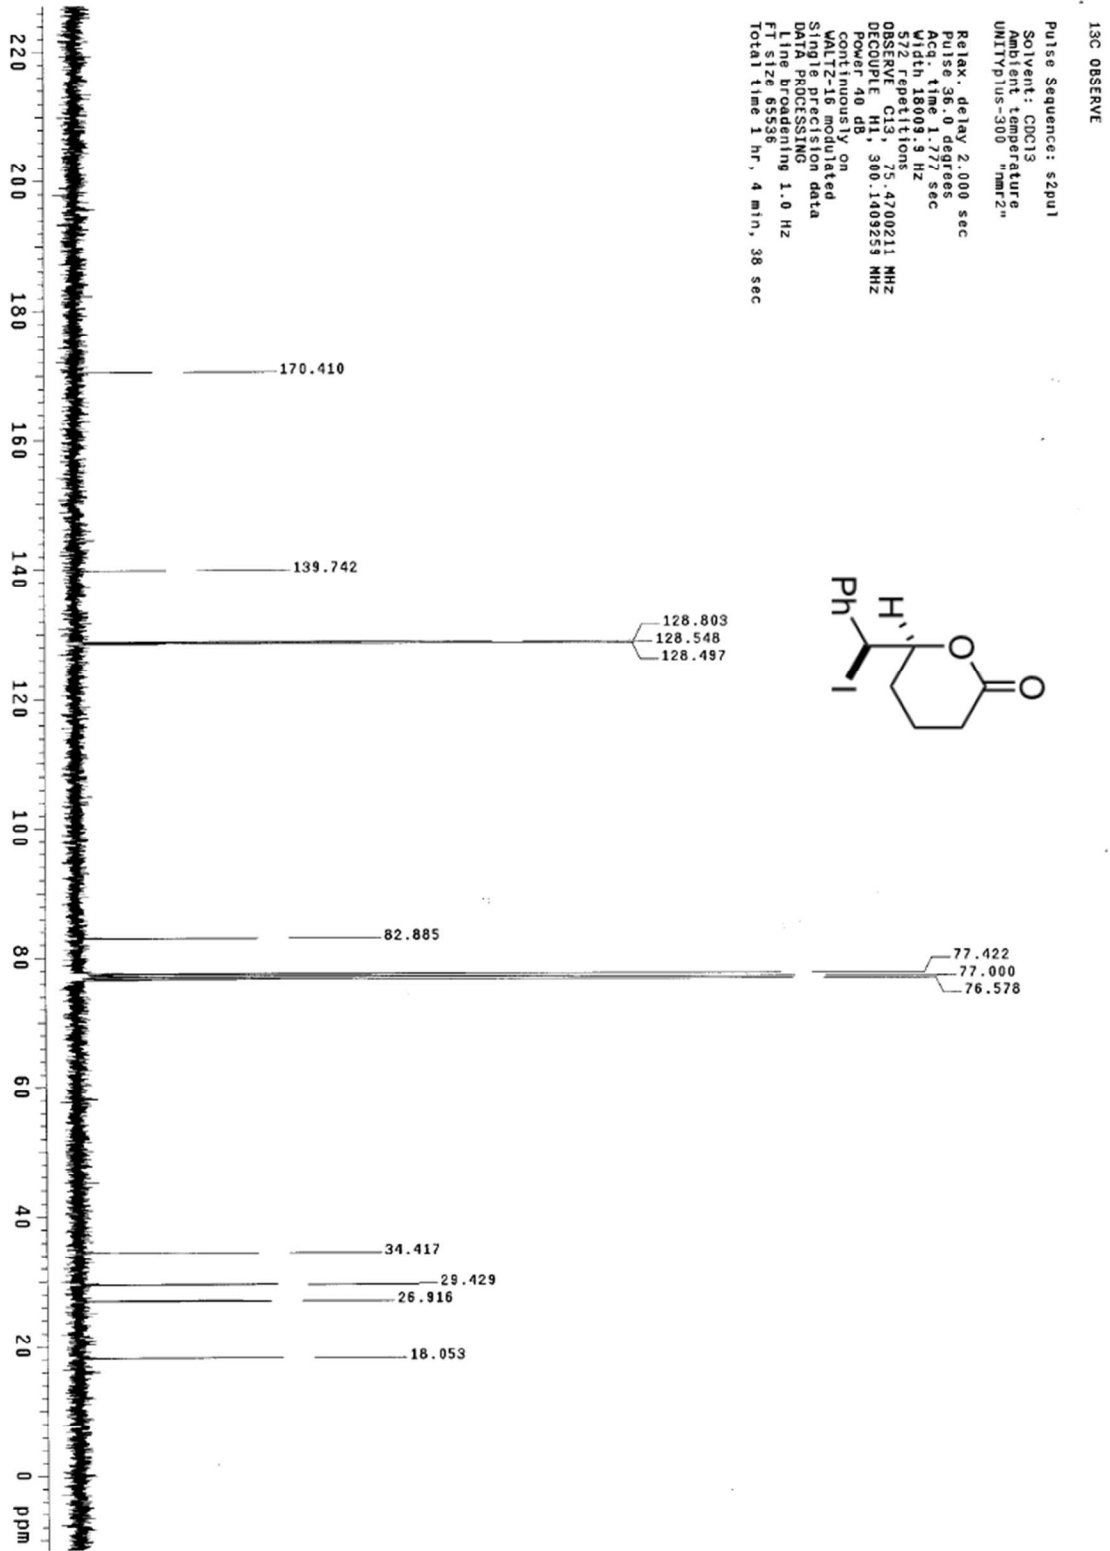

Figure S-26 <sup>13</sup>C NMR of Compound 8a

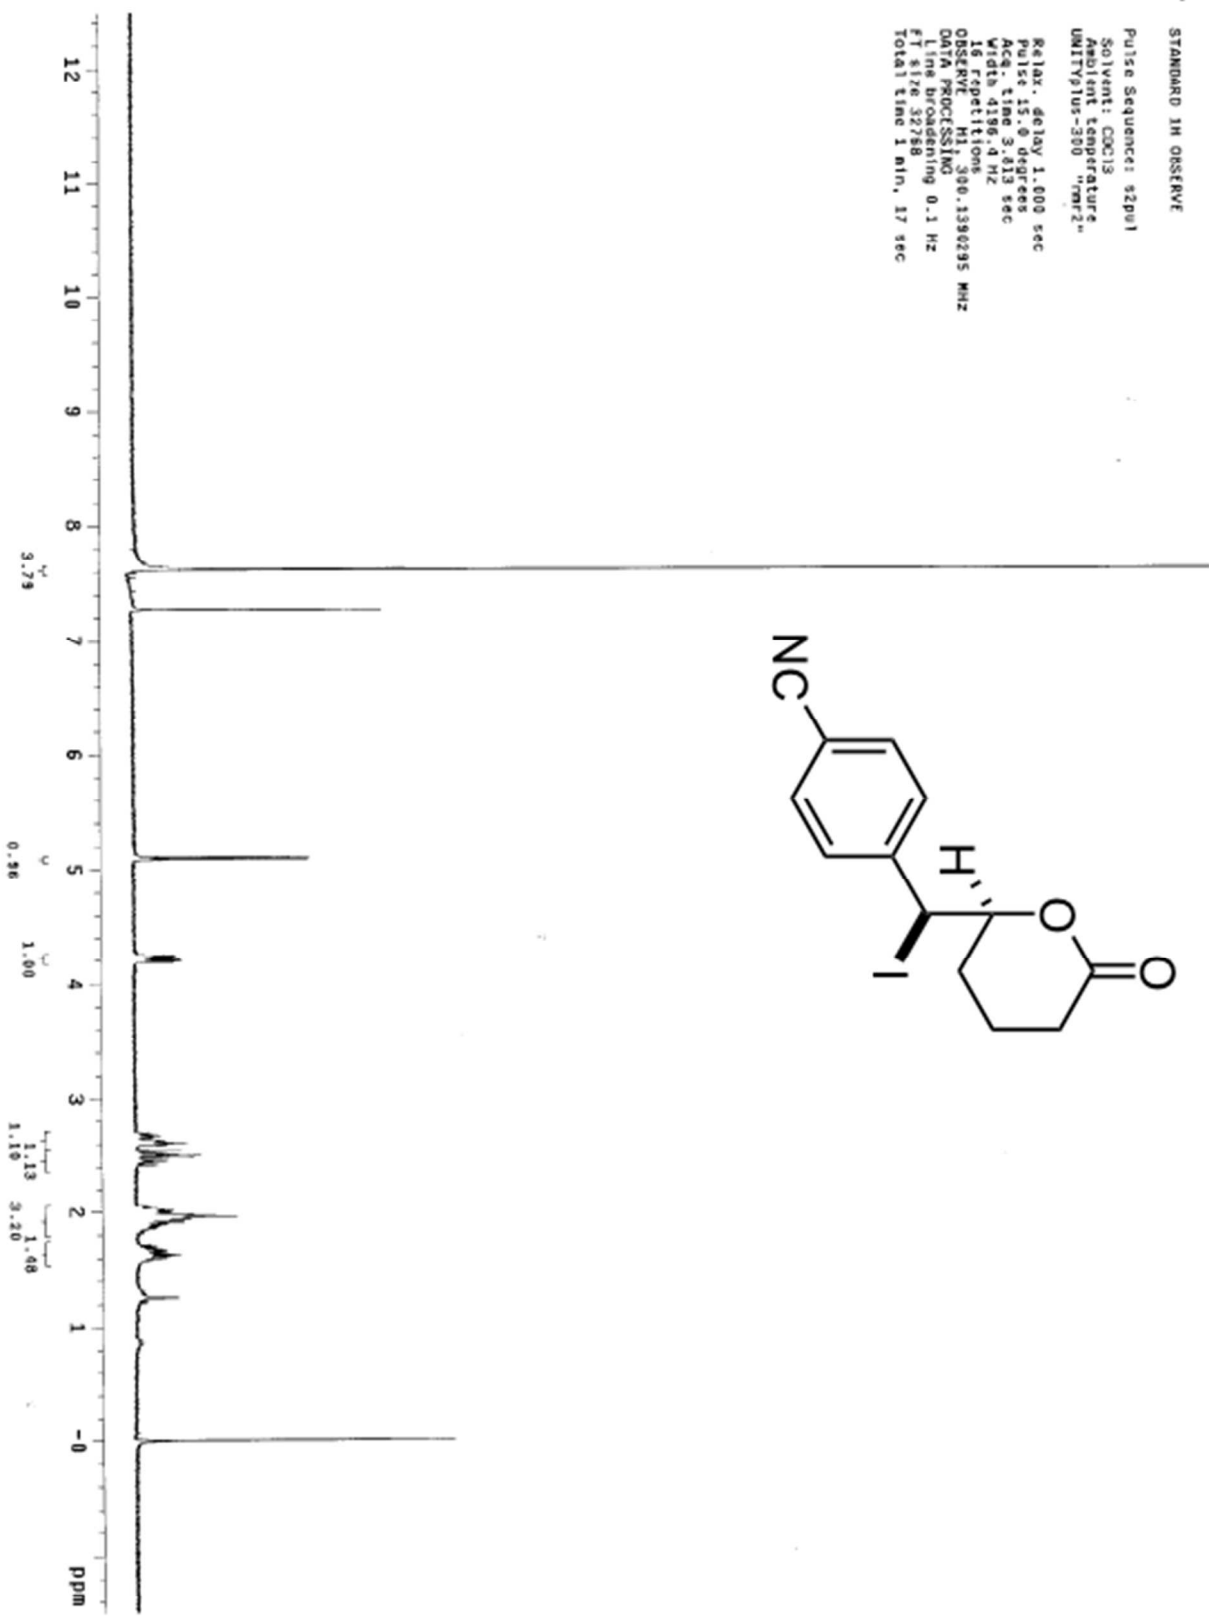

Figure S-27 <sup>1</sup>H NMR of Compound 8b

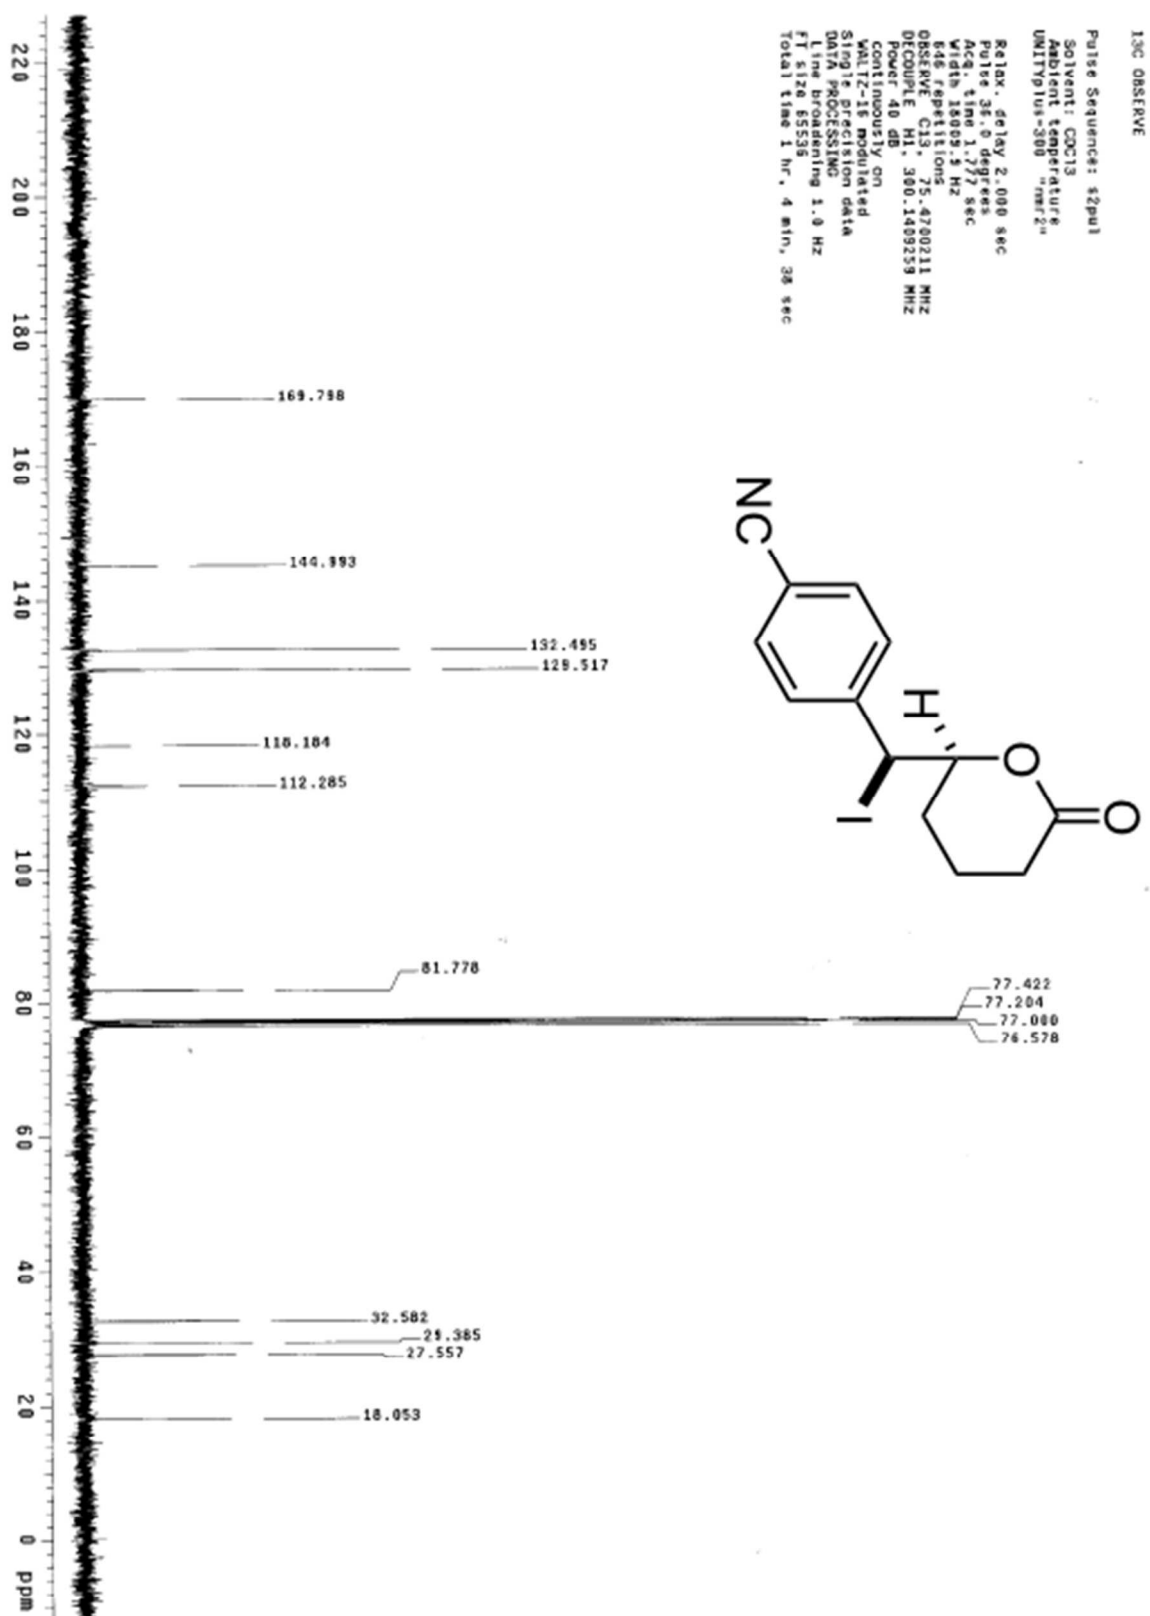

Figure S-28 <sup>13</sup>C NMR of Compound 8b

STANDARD 1H OBSERVE

Pulse Sequence: s2pu1

Solvent: CDCl3

Acquisition Temperature: 300.15 K

UNITYP1US-300 "nmr2"

Relax. delay: 1.000 sec

Pulse: 12.000000 sec

Acq: 12.000000 sec

Width: 4196.4 Hz

16 repetitions

OBSERVE: H1, 300.1390321 MHz

DATA PROCESSING

Line broadening: 0.1 Hz

FT size: 32768

Total time: 1 min, 17 sec

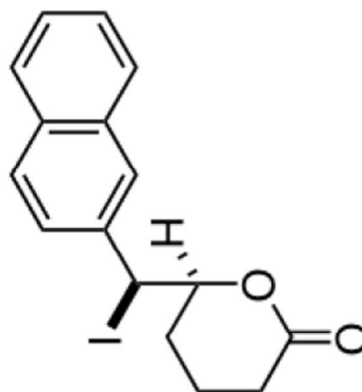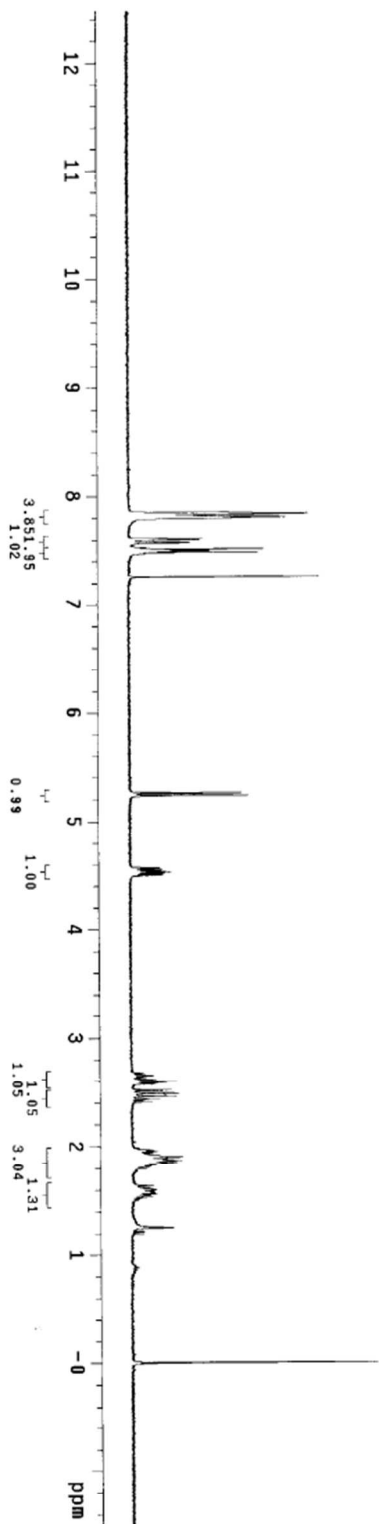

Figure S-29 <sup>1</sup>H NMR of Compound 8c



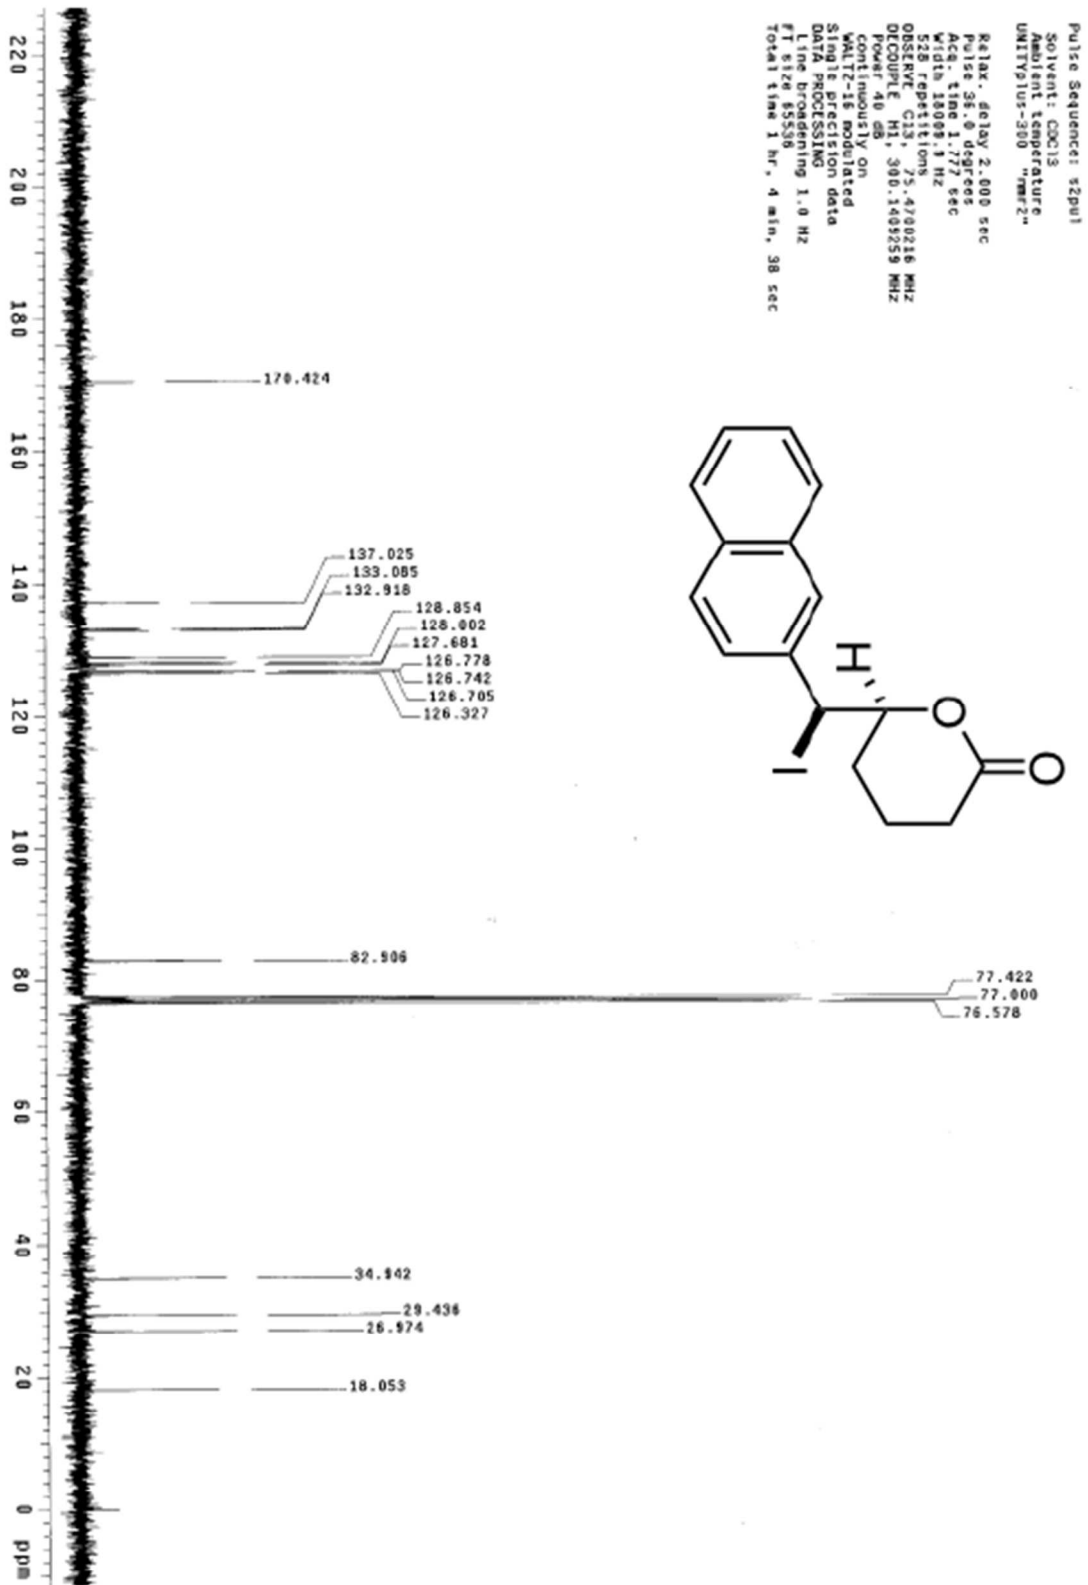

Figure S-30 <sup>13</sup>C NMR of Compound 8c

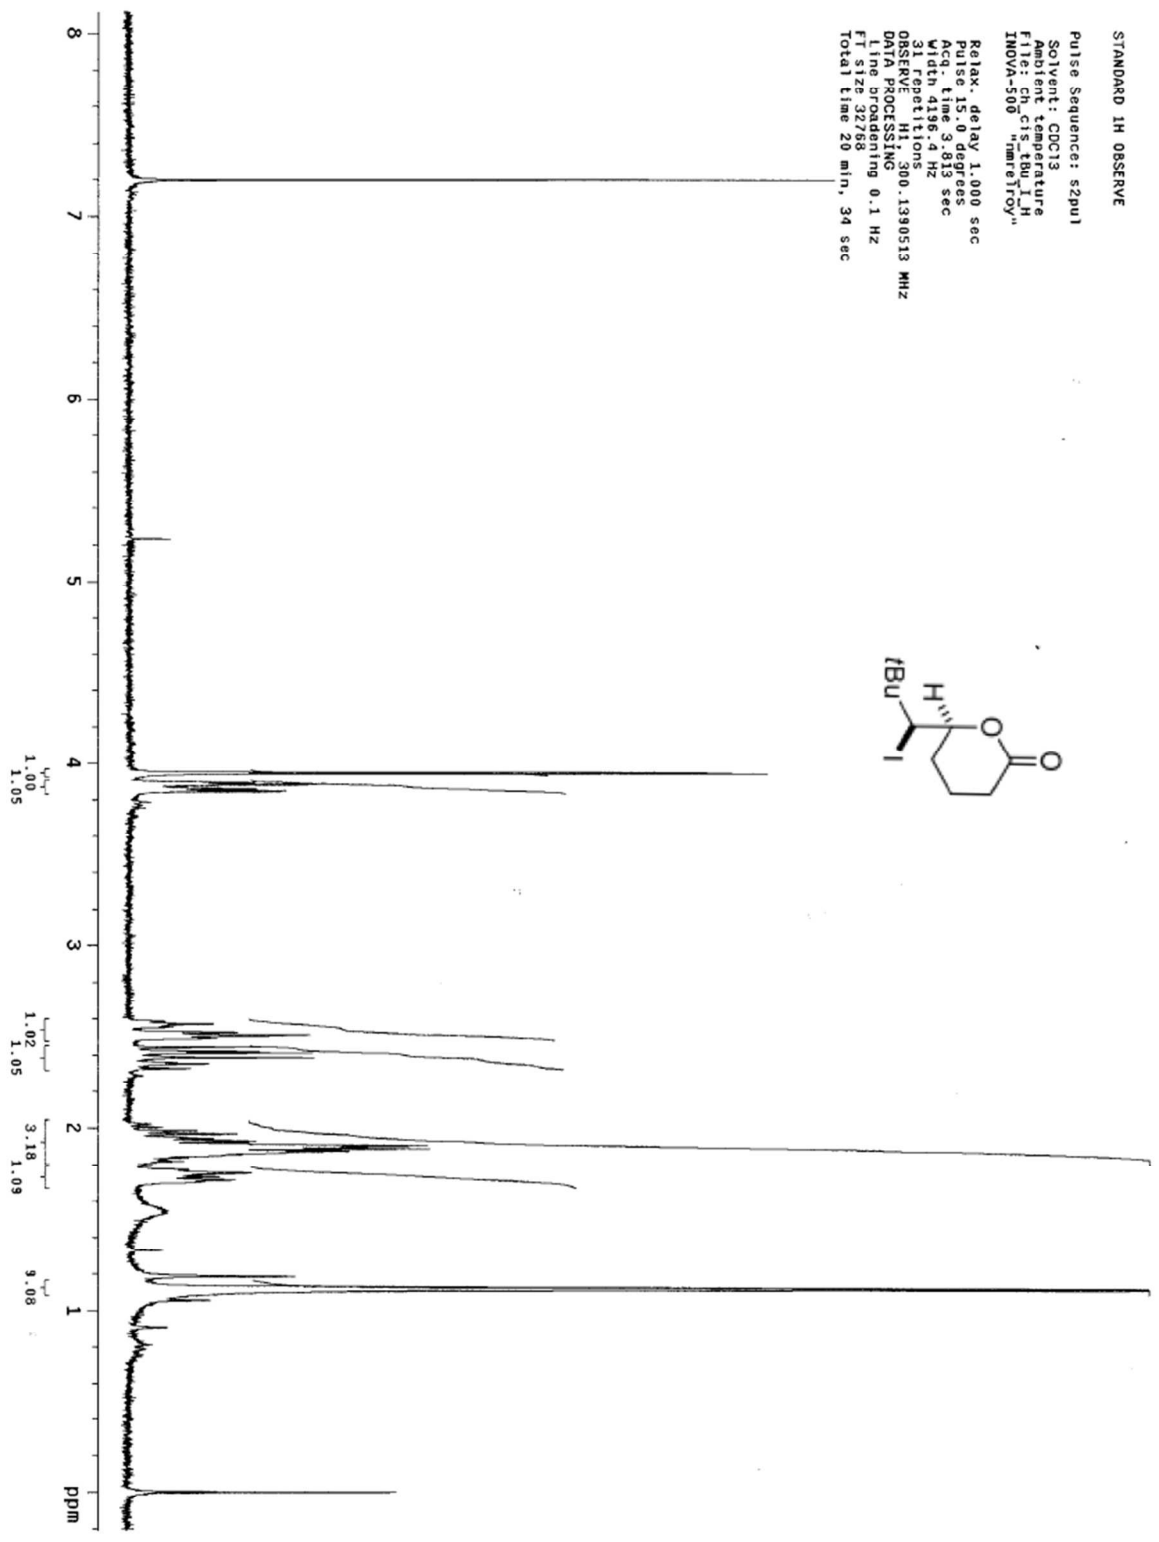

Figure S-31 <sup>1</sup>H NMR of Compound 8d

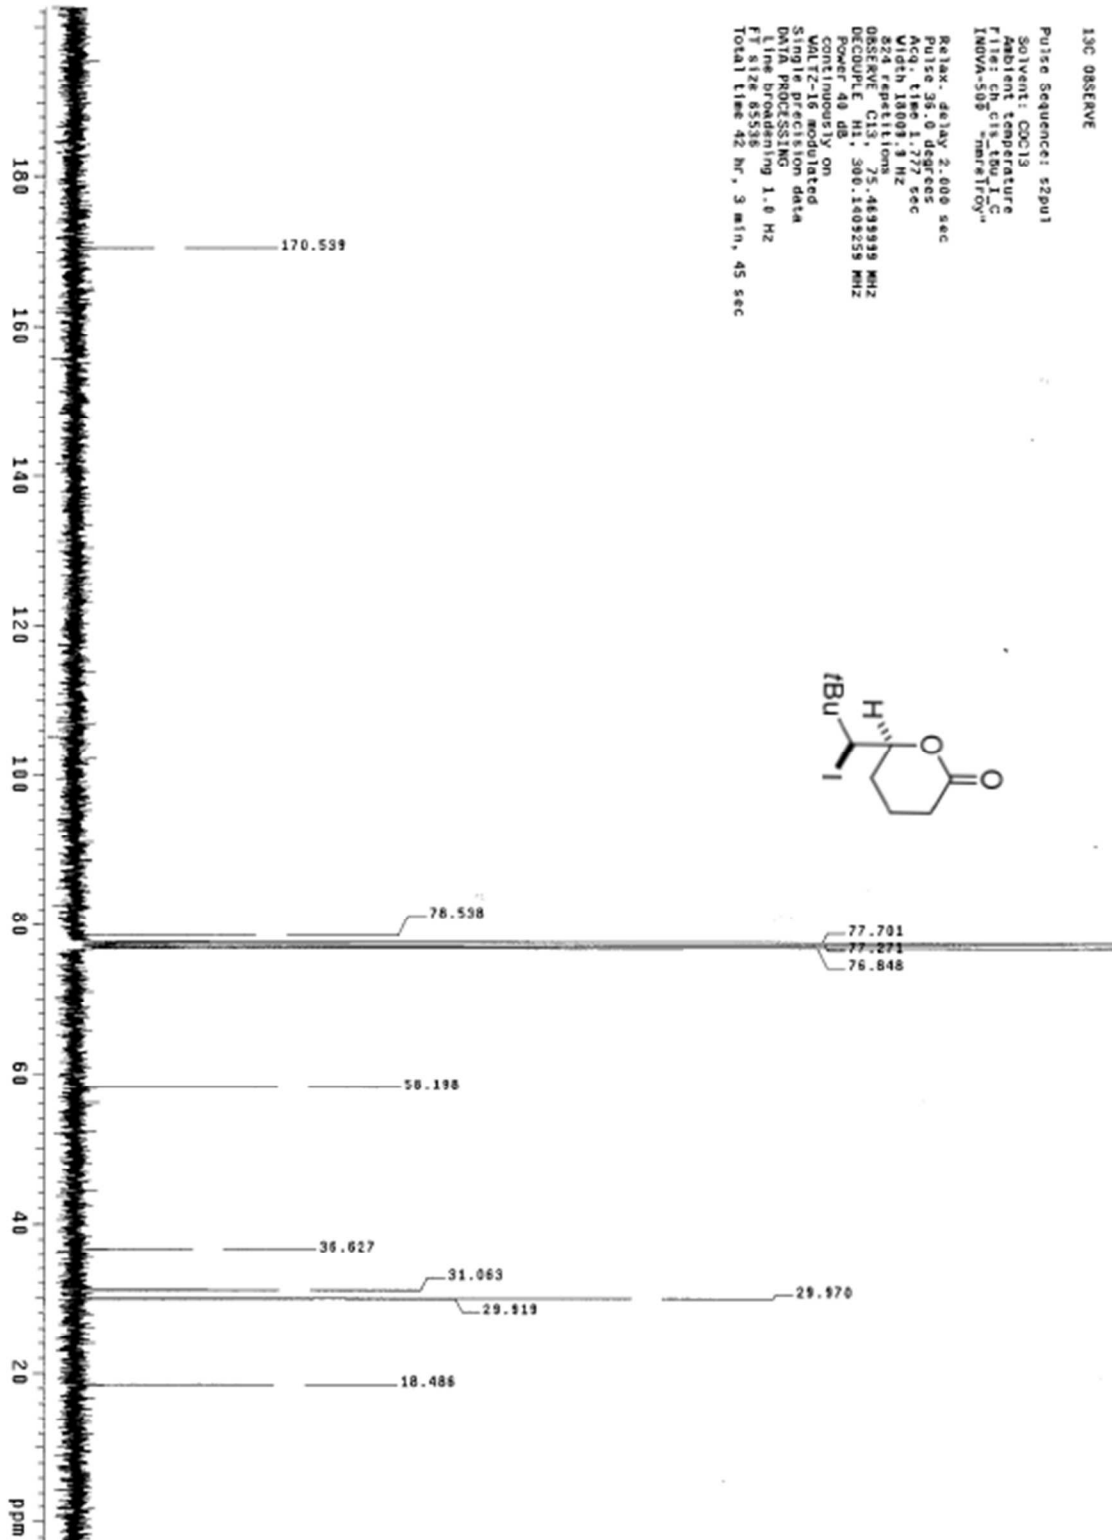

Figure S-32 <sup>13</sup>C NMR of Compound 8d

STANDARD 1H OBSERVE

Pulse Sequence: szpu1  
 Solvent: CDCl3  
 Acquisition Temperature  
 Mercury-400DB "nmr6"

Relax. delay 2.000 sec  
 Pulse program  
 Acquisition time 2.856 sec  
 Width 5892.2 Hz  
 8 repetitions

OBSERVE: H1, 400.2669784 MHz  
 DATA PROCESSING  
 Line broadening 0.1 Hz  
 FT size 32768  
 Total time 0 min, 41 sec

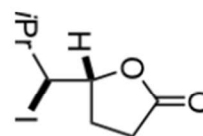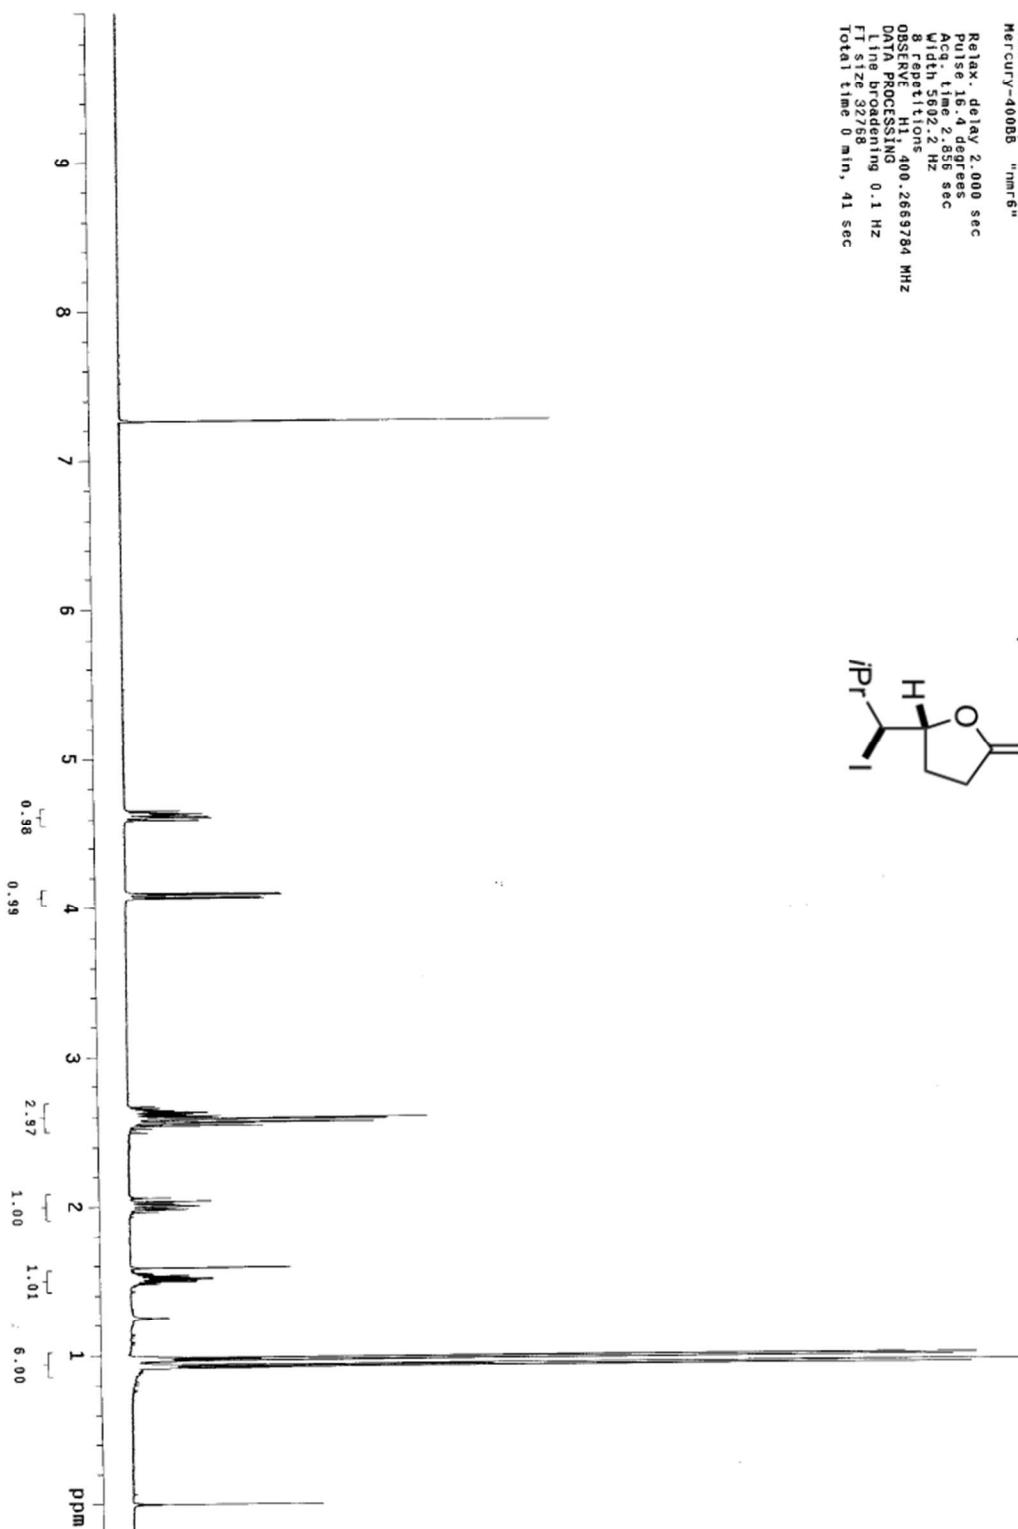

Figure S-33 <sup>1</sup>H NMR of Compound 10a

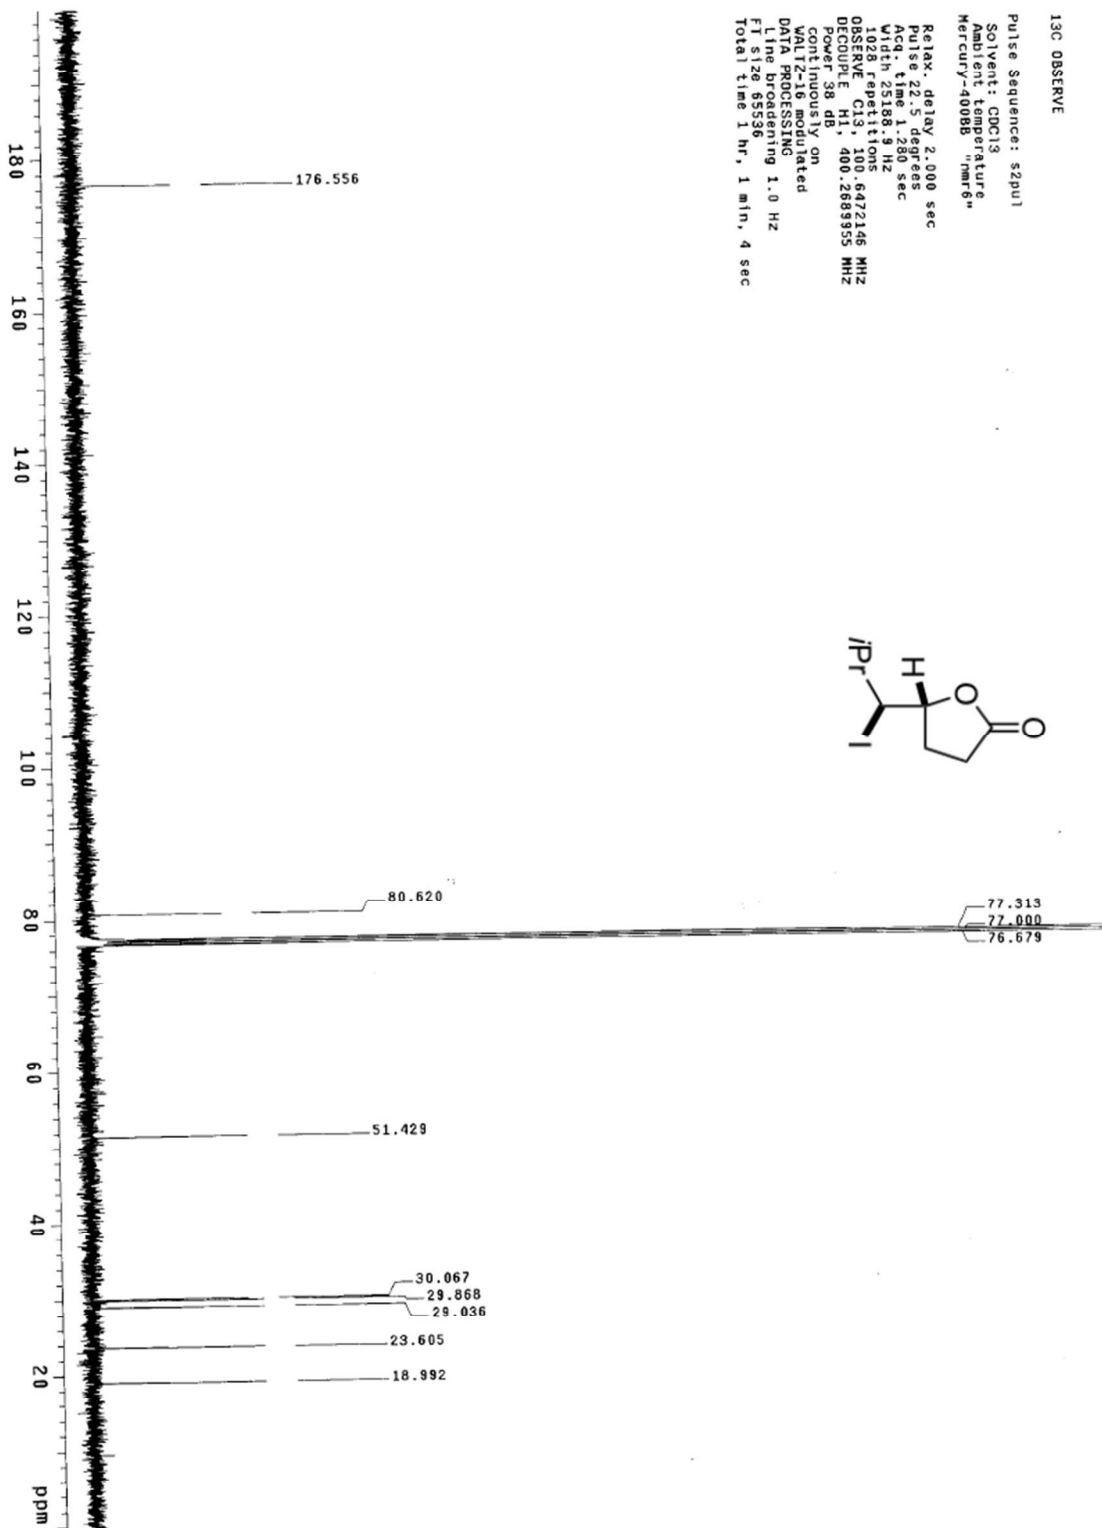

Figure S-34 <sup>13</sup>C NMR of Compound 10a

STANDARD 1H OBSERVE

Pulse Sequence: s2pu1  
 Solvent: CDCl3  
 Ambient Temperature  
 Mercury-40088 "nmr8"

Relax. delay 2.000 sec  
 Pulse 16.4 degrees  
 Acq. time 2.856 sec  
 Width 5602.2 Hz  
 16 repetitions

OBSERVE: H1100.2668771 MHz  
 DATA ACQUISITION  
 FI size 32768  
 Total time 0 min, 0 sec

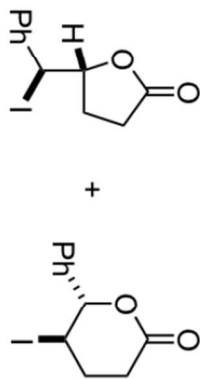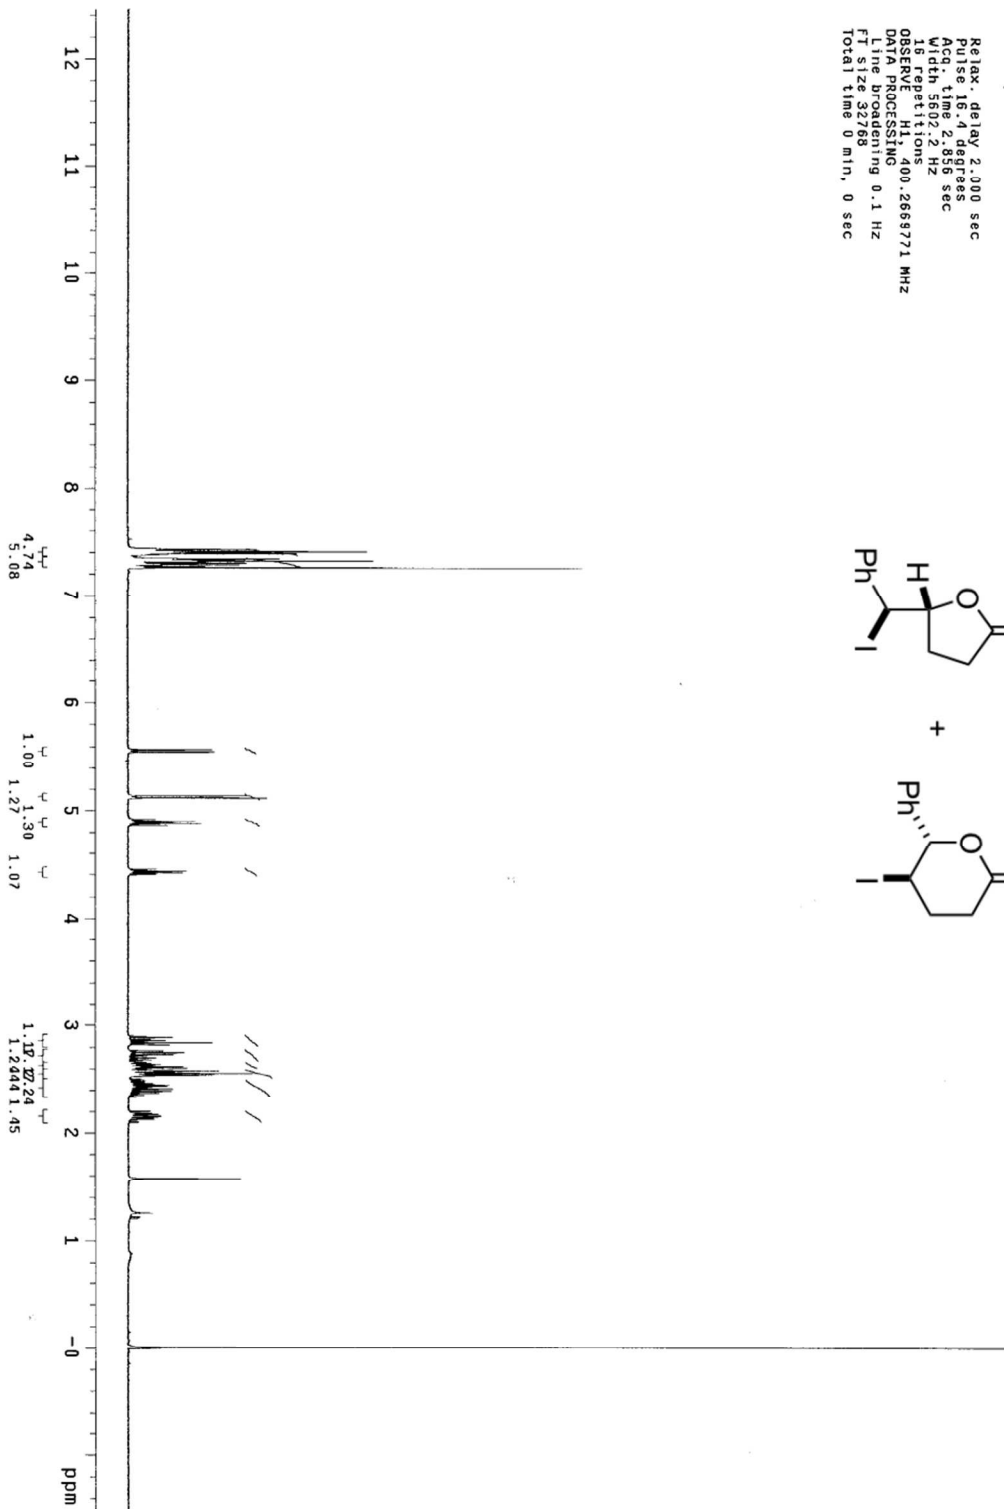

Figure S-35 <sup>1</sup>H NMR of Compound 10b and 11b

STANDARD 1H OBSERVE

Pulse Sequence: s2pu1  
 Solvent: CDCl3  
 Ambient temperature  
 Mercury-40088 nm/s

Relax. delay 2.000 sec  
 Pulse 16.4 degrees  
 Acq. time 2.856 sec  
 Width 5802.2 Hz  
 8 Scans

08SEP2011 11:41  
 OSEPP0110ns400.2669784 MHZ  
 DATA PROCESSING  
 Line broadening 0.1 Hz  
 FT size 32768  
 Total time 0 min, 41 sec

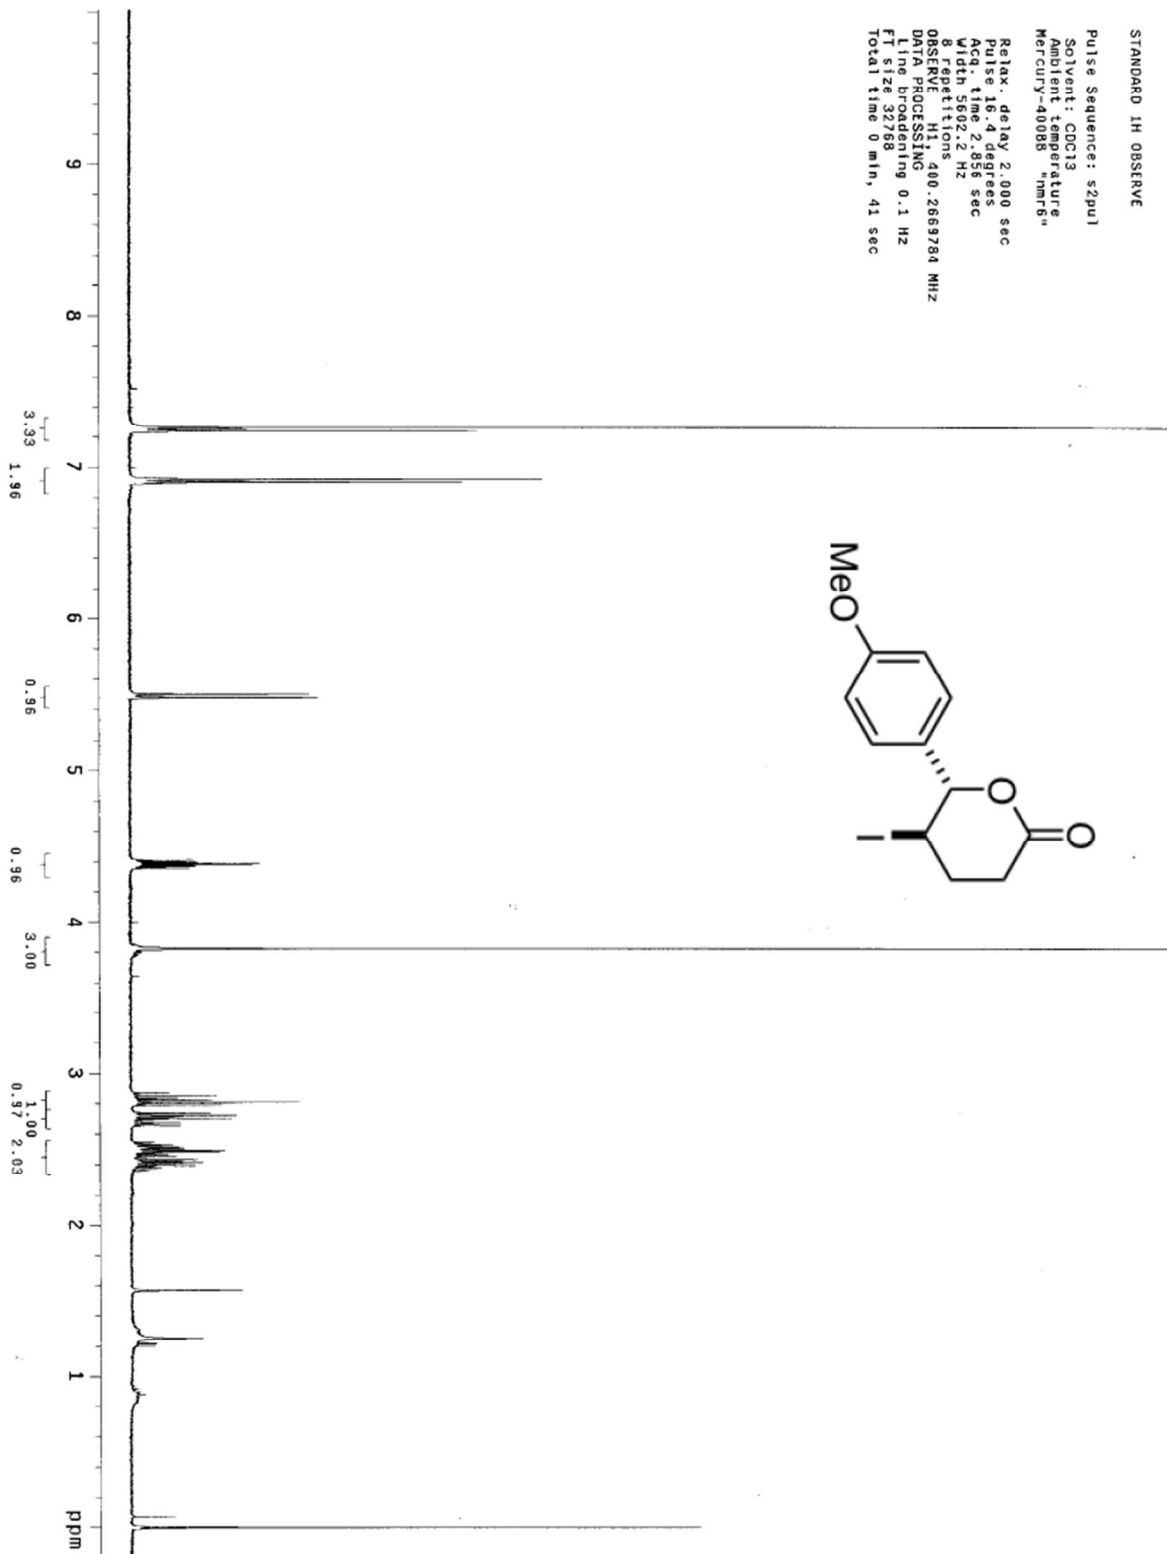

Figure S-36 <sup>1</sup>H NMR of Compound 11c

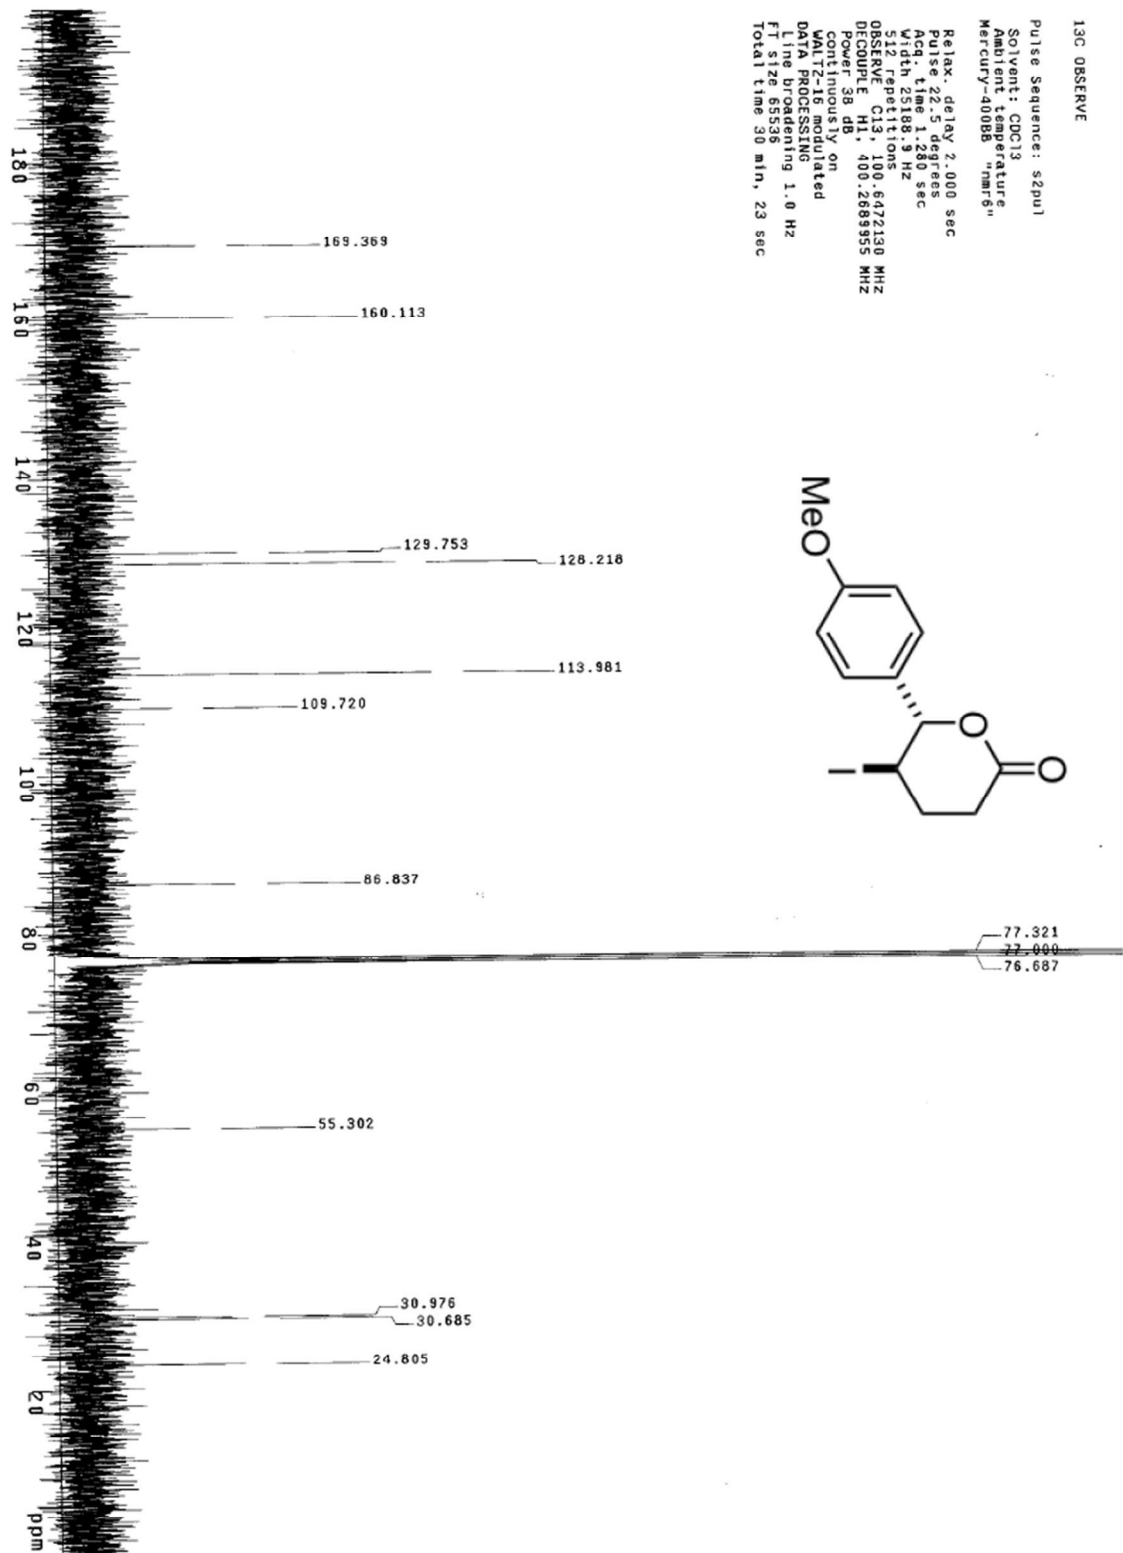

Figure S-37 <sup>13</sup>C NMR of Compound 11c



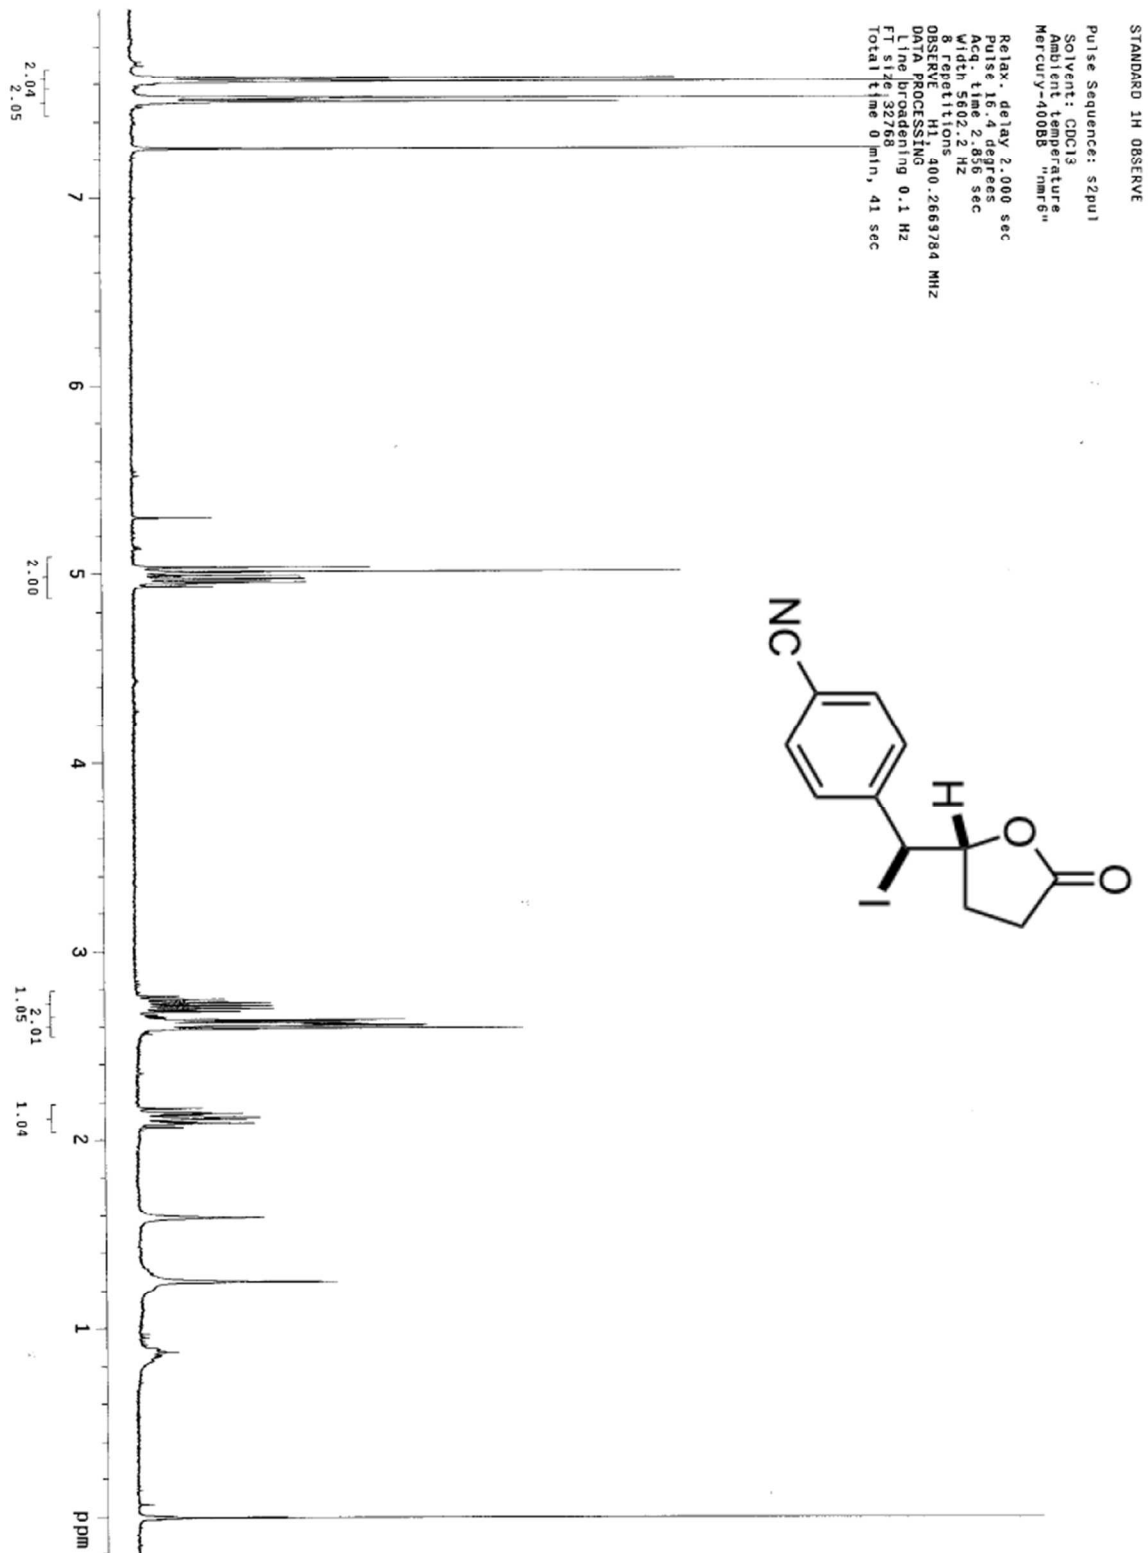

Figure S-38 <sup>1</sup>H NMR of Compound 10d

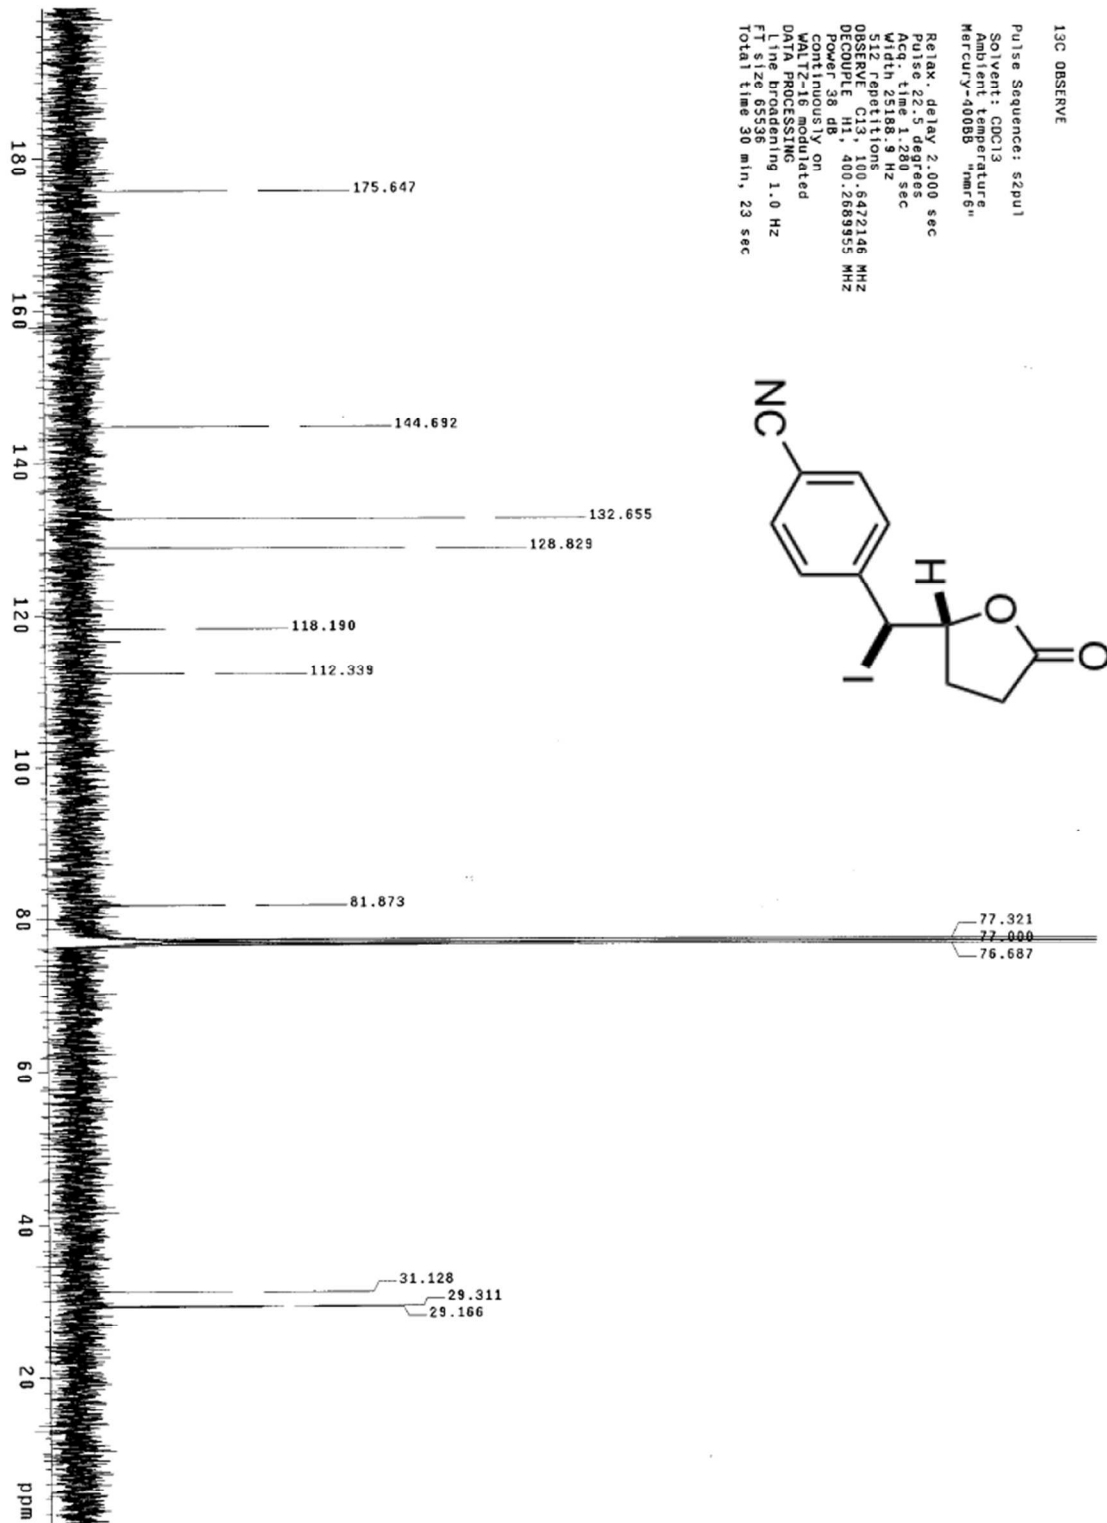

Figure S-39 <sup>13</sup>C NMR of Compound 10d

STANDARD 1H OBSERVE

Pulse Sequence: s2pu1  
Solvent: CDCl3  
Ambient temperature  
Mercury-400BB "nmr6"  
Relax. delay 2.000 sec  
Pulse 18.4 degrees  
Acq. time 2.856 sec  
NUC1 13C12.2 Hz  
NUC2 1H  
OBSERVE1 H100.2669761 MHz  
DATA PROCESSING  
Line broadening 0.1 Hz  
FI size 32768  
Total time 0 min, 0 sec

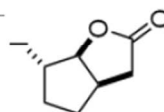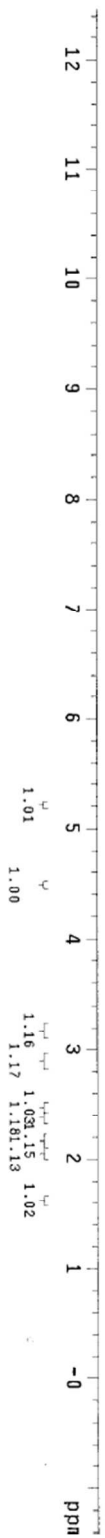

Figure S-40 <sup>1</sup>H NMR of Compound 13

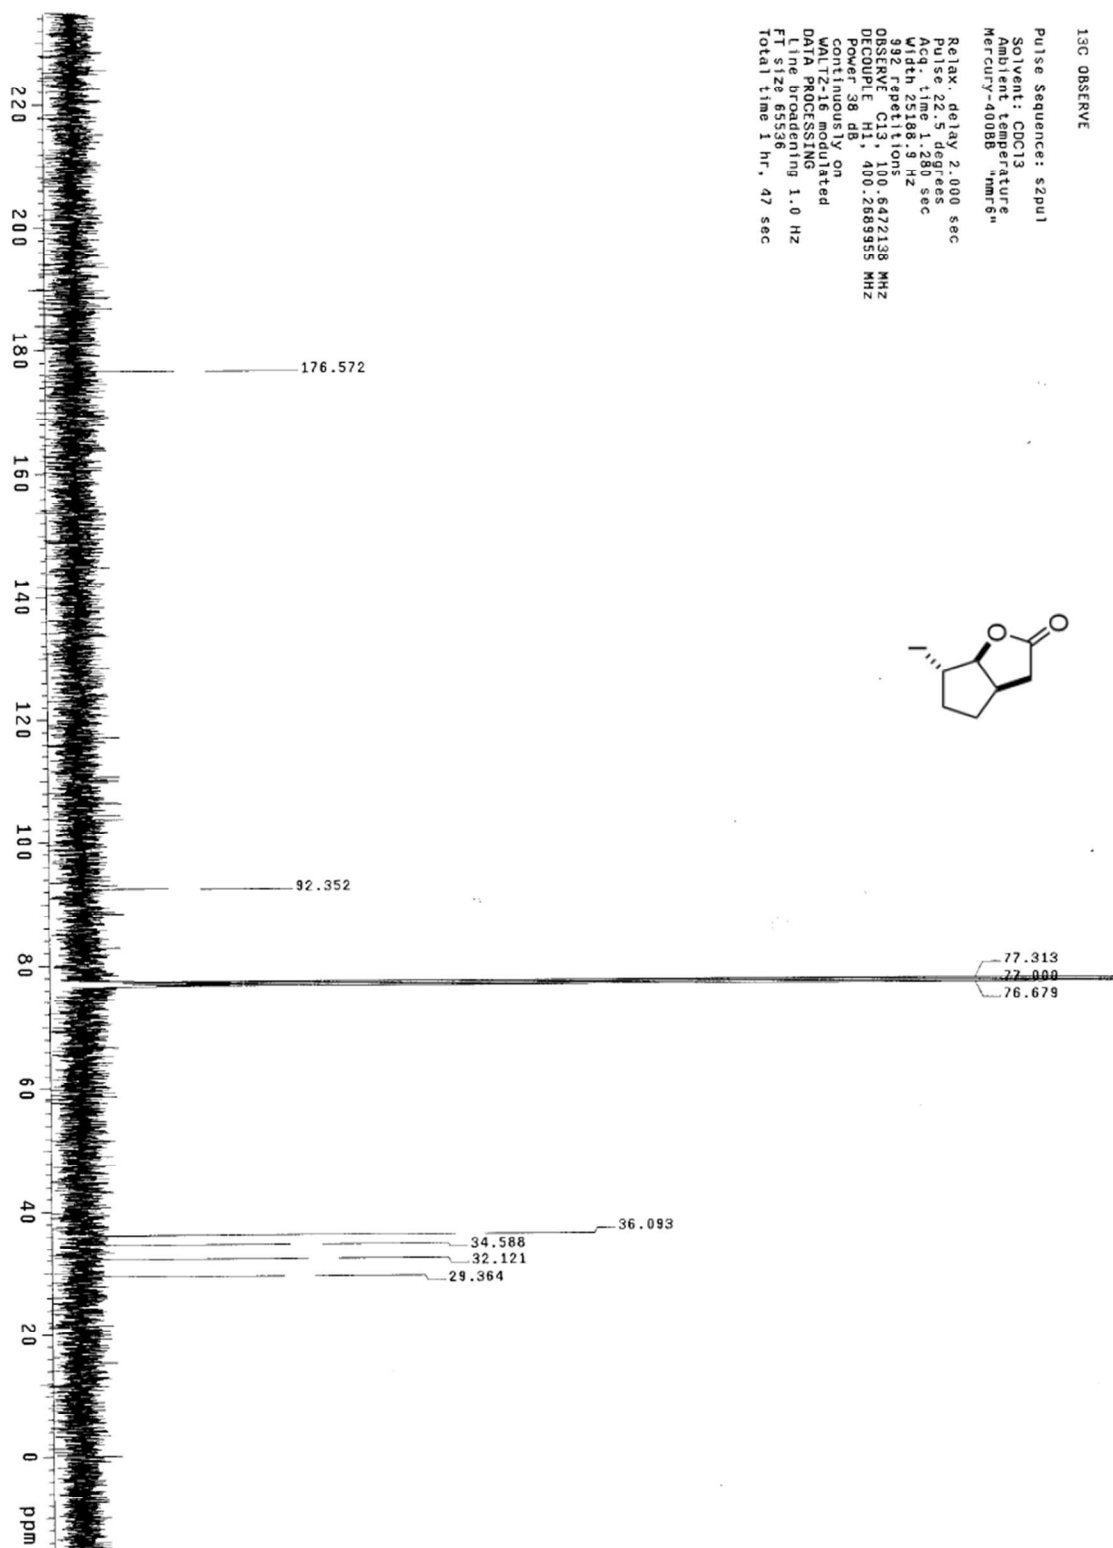

Figure S-41 <sup>13</sup>C NMR of Compound 13

STANDARD 1H OBSERVE

Pulse Sequence: s2pu1  
 Solvent: CDCl3  
 Ambient temperature  
 UNITYplus-300 "nmr2"

Relax. delay 1.000 sec  
 Pulse 15.0 degrees  
 Acq. time 3.813 sec  
 Width 4195.4 Hz  
 16 repetitions

OBSERVE H1:300.1390293 MHZ  
 DATA PROCESSING 0.1 HZ  
 FT SIZ: 32768  
 Total time 1 min, 17 sec

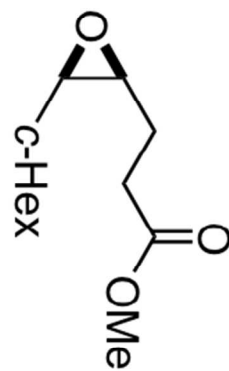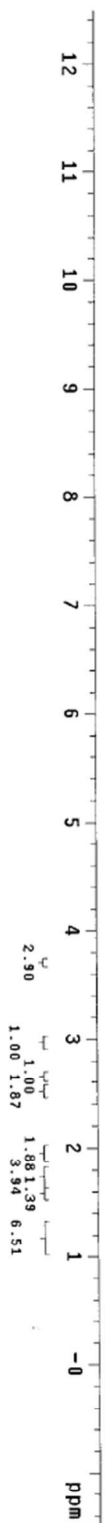

Figure S-42 <sup>1</sup>H NMR of Compound 14

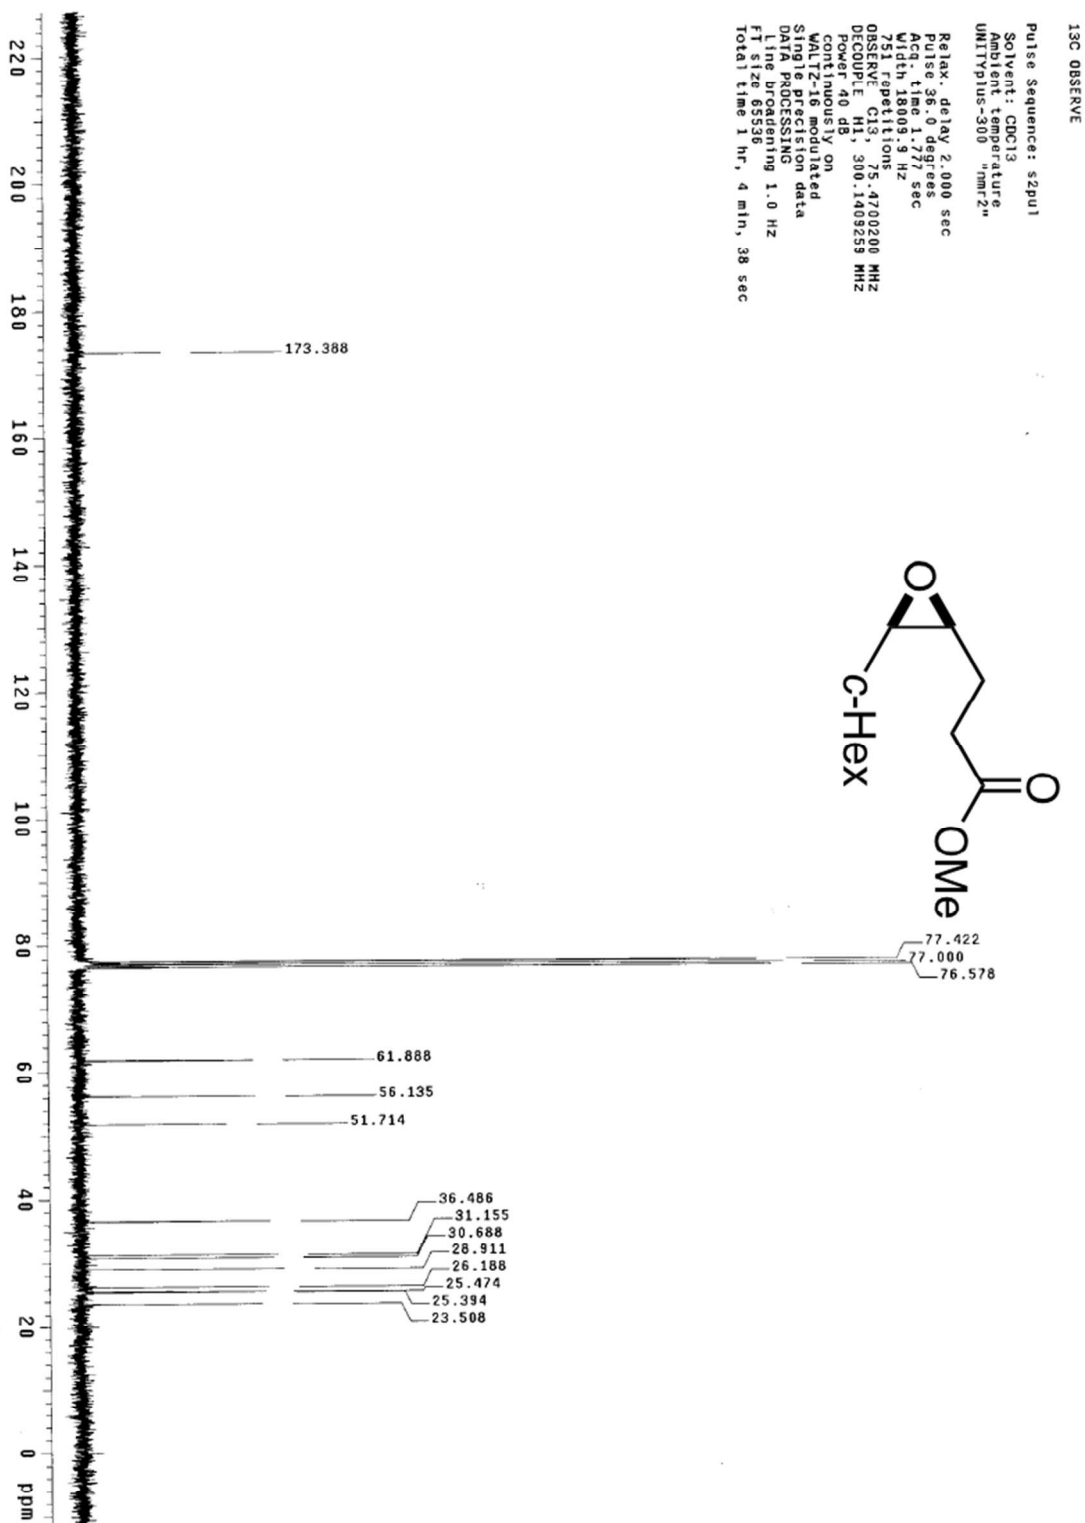

Figure S-43 <sup>13</sup>C NMR of Compound 14

## References

1. Pangborn, A. B.; Giardello, M. A.; Grubbs, R. H.; Rosen, R. K.; Timmers, F. J. *Organometallics* **1996**, *15*, 1518–1520.
2. Vankar, Y. D.; Kumaravel, G. *Tetrahedron Lett.* **1984**, *25*, 233–236.
3. Paull, D. H.; Fang, C.; Donald, J. D.; Pansick, A. D.; Martin, S. F. *J. Am. Chem. Soc.* **2012**, *134*, 11128–11131.
4. (a) Tan, C. K. T.; Zhou, L.; Yeung, Y.-Y. *Org. Lett.* **2011**, *13*, 2738–2741. (b) Tan, C. K.; Le, C.; Yeung, Y.-Y. *Chem. Commun.*, **2012**, *48*, 5793–5795.
5. Kaga, H.; Coto, K.; Takahashi, T.; Hino, M.; Tokuashi, T.; Orito, K. *Tetrahedron* **1996**, *52*, 8451–8470.
